# Supplementary material
Source: PubMed Central journal article supplement (PMC3426686)
Supplement: AEM.01259-12_zam999103661so1.pdf [file AEM.01259-12_zam999103661so1.pdf]

Supplemental Table 1. Bacterial strains used for sequencing and MALDI-TOF validation

| Collection   | Genus              | Species     | Serotype | Strain Designation | Source               | Country          | Application <sup>a</sup> | Genbank accession number | Reference <sup>b</sup> |
|--------------|--------------------|-------------|----------|--------------------|----------------------|------------------|--------------------------|--------------------------|------------------------|
| ECRC         | <i>Escherichia</i> | <i>coli</i> | O26      | 0_0761             | Chicken              | N/A <sup>c</sup> | I                        | JN871617                 | 4                      |
| ECRC         | <i>Escherichia</i> | <i>coli</i> | O26      | 0_0824             | Chicken              | N/A              | I                        | JN871618                 | 4                      |
| ECRC         | <i>Escherichia</i> | <i>coli</i> | O26:H11  | 0.1015             | Bovine               | N/A              | III                      |                          |                        |
| Acheson - MA | <i>Escherichia</i> | <i>coli</i> | O26:H11  | 10                 | Human                | USA              | III                      |                          |                        |
| Acheson - MA | <i>Escherichia</i> | <i>coli</i> | O26:NM   | 22                 | Human                | USA              | III                      |                          |                        |
| ECRC         | <i>Escherichia</i> | <i>coli</i> | O26:H11  | 81.0193            | Conure, (Psittacine) | N/A              | III                      |                          |                        |
| ECRC         | <i>Escherichia</i> | <i>coli</i> | O26:H11  | 81.0211            | Antelope             | N/A              | III                      |                          |                        |
| SDSU         | <i>Escherichia</i> | <i>coli</i> | O26:H11  | 88-1577            | N/A                  | USA              | III                      |                          |                        |
| SDSU         | <i>Escherichia</i> | <i>coli</i> | O26:H11  | 89.4911            | N/A                  | USA              | III                      |                          |                        |
| ECRC         | <i>Escherichia</i> | <i>coli</i> | O26:H11  | 90.0105            | Human                | N/A              | III                      |                          |                        |
| ECRC         | <i>Escherichia</i> | <i>coli</i> | O26      | 90.0157            | Turkey               | N/A              | I                        | JN871663                 | 4                      |
| ECRC         | <i>Escherichia</i> | <i>coli</i> | O26:H11  | 93.0495            | Human                | N/A              | I                        | JN871646                 | 4                      |
| ECRC         | <i>Escherichia</i> | <i>coli</i> | O26:H11  | 93.0506            | Human                | N/A              | III                      |                          |                        |
| ECRC         | <i>Escherichia</i> | <i>coli</i> | O26      | 94.0003            | N/A                  | N/A              | I                        | JN871613                 |                        |
| ECRC         | <i>Escherichia</i> | <i>coli</i> | O26:H11  | 95.0256            | Bovine               | N/A              | I                        | JN871647                 | 4                      |
| ECRC         | <i>Escherichia</i> | <i>coli</i> | O26:H11  | 95.0274            | Bovine               | N/A              | III                      |                          |                        |
| ECRC         | <i>Escherichia</i> | <i>coli</i> | O26:H11  | 99.0285            | Bovine               | N/A              | III                      |                          |                        |
| ECRC         | <i>Escherichia</i> | <i>coli</i> | O26:H11  | 99.0703            | Bovine               | N/A              | I                        | JN871633                 | 4                      |
| ECRC         | <i>Escherichia</i> | <i>coli</i> | O26:H11  | 99.0849            | Human                | N/A              | III                      |                          |                        |
| ECRC         | <i>Escherichia</i> | <i>coli</i> | O26:H11  | 99.0862            | Bovine               | N/A              | III                      |                          |                        |
| ECRC         | <i>Escherichia</i> | <i>coli</i> | O26:H11  | 99.0869            | Human                | N/A              | III                      |                          |                        |
| IDPHD        | <i>Escherichia</i> | <i>coli</i> | O26:H11  | 7922               | Human                | USA              | I                        | JN871644                 |                        |
| IDPHD        | <i>Escherichia</i> | <i>coli</i> | O26:H11  | 10140              | Human                | USA              | I                        | JN871639                 |                        |
| IDPHD        | <i>Escherichia</i> | <i>coli</i> | O26:H11  | 10469              | Human                | USA              | I                        | JN871629                 |                        |
| ATCC         | <i>Escherichia</i> | <i>coli</i> | O26:H11  | 11840              | N/A                  | N/A              | III                      |                          |                        |
| IDPHD        | <i>Escherichia</i> | <i>coli</i> | O26:H11  | 12690              | Human                | USA              | III                      |                          |                        |
| IDPHD        | <i>Escherichia</i> | <i>coli</i> | O26:H11  | 12795              | Human                | USA              | I                        | JN871666                 |                        |
| IDPHD        | <i>Escherichia</i> | <i>coli</i> | O26:H11  | 13081              | Human                | USA              | III                      |                          |                        |
| CDC          | <i>Escherichia</i> | <i>coli</i> | O26:H11  | 00-3230            | Human                | USA              | I                        | JN871635                 |                        |
| CDC          | <i>Escherichia</i> | <i>coli</i> | O26:H11  | 01-3327            | Human                | USA              | I                        | JN871636                 |                        |
| CDC          | <i>Escherichia</i> | <i>coli</i> | O26:H11  | 05-3471            | Human                | USA              | I                        | JN871637                 |                        |
| CDC          | <i>Escherichia</i> | <i>coli</i> | O26:H11  | 06-3044            | Human                | USA              | I                        | JN871621                 |                        |
| CDC          | <i>Escherichia</i> | <i>coli</i> | O26:H11  | 06-3288            | Human                | USA              | I                        | JN871626                 |                        |
| CDC          | <i>Escherichia</i> | <i>coli</i> | O26:H11  | 07-3337            | Human                | USA              | I                        | JN871622                 |                        |
| CDC          | <i>Escherichia</i> | <i>coli</i> | O26:H11  | 07-3722            | Human                | USA              | I                        | JN871628                 |                        |
| CDC          | <i>Escherichia</i> | <i>coli</i> | O26:H11  | 08-3323            | Human                | USA              | I                        | JN871638                 |                        |
| CDC          | <i>Escherichia</i> | <i>coli</i> | O26:H11  | 08-3449            | Human                | USA              | I                        | JN871623                 |                        |
| CDC          | <i>Escherichia</i> | <i>coli</i> | O26:H11  | 08-4358            | Human                | USA              | I                        | JN871627                 |                        |
| Acheson - MA | <i>Escherichia</i> | <i>coli</i> | O26:H11  | 10-253             | Human                | USA              | III                      |                          |                        |
| ECRC - DECA  | <i>Escherichia</i> | <i>coli</i> | O26:H11  | 10B                | Human                | Australia        | I                        | JN871630                 | 11                     |
| ECRC - DECA  | <i>Escherichia</i> | <i>coli</i> | O26:H11  | 10C                | Human                | USA              | I                        | JN871640                 | 11                     |
| ECRC - DECA  | <i>Escherichia</i> | <i>coli</i> | O26:H11  | 10E                | Calf                 | USA              | I                        | JN871641                 | 11                     |
| Fair 2002    | <i>Escherichia</i> | <i>coli</i> | O26:H11  | 18B24-2            | Bovine               | USA              | III                      |                          |                        |

Supplemental Table 1. Bacterial strains used for sequencing and MALDI-TOF validation

| Collection          | Genus              | Species     | Serotype | Strain Designation | Source | Country     | Application <sup>a</sup> | Genbank accession number | Reference <sup>b</sup> |
|---------------------|--------------------|-------------|----------|--------------------|--------|-------------|--------------------------|--------------------------|------------------------|
| CDC                 | <i>Escherichia</i> | <i>coli</i> | O26:H11  | 2009C-3612         | Human  | USA         | I                        | JN871624                 |                        |
| CDC                 | <i>Escherichia</i> | <i>coli</i> | O26:H11  | 2009C-3689         | Human  | USA         | I                        | JN871620                 |                        |
| CDC                 | <i>Escherichia</i> | <i>coli</i> | O26:H11  | 2010C-3902         | Human  | USA         | I                        | JN871642                 |                        |
| MARC                | <i>Escherichia</i> | <i>coli</i> | O26:H11  | 40-1               | Bovine | USA         | III                      |                          |                        |
| Acheson - MA        | <i>Escherichia</i> | <i>coli</i> | O26:H11  | 5-447              | Human  | USA         | III                      |                          |                        |
| ECRC                | <i>Escherichia</i> | <i>coli</i> | O26:H46  | 5306.56            | Bovine | USA         | I                        | JN871656                 | 4                      |
| Pop. ZX             | <i>Escherichia</i> | <i>coli</i> | O26:H11  | 6648-1             | Bovine | USA         | III                      |                          |                        |
| Fly Prevalence 2007 | <i>Escherichia</i> | <i>coli</i> | O26:H11  | 7_11_88A           | Fly    | USA         | I                        | JN871645                 |                        |
| Fly Prevalence 2007 | <i>Escherichia</i> | <i>coli</i> | O26:H11  | 7-12 15B           | Bovine | USA         | III                      |                          |                        |
| Fly Prevalence 2007 | <i>Escherichia</i> | <i>coli</i> | O26:H11  | 7-15 5C            | Bovine | USA         | III                      |                          |                        |
| Fly Prevalence 2007 | <i>Escherichia</i> | <i>coli</i> | O26:H11  | 7_29_23A           | Bovine | USA         | I                        | JN871625                 |                        |
| Fly Prevalence 2007 | <i>Escherichia</i> | <i>coli</i> | O26:H11  | 7-33 80A           | Fly    | USA         | III                      |                          |                        |
| U of Georgia        | <i>Escherichia</i> | <i>coli</i> | O26:H11  | 88-353             | N/A    | USA         | III                      |                          |                        |
| Acheson - MA        | <i>Escherichia</i> | <i>coli</i> | O26:H11  | 9-23               | Human  | USA         | III                      |                          |                        |
| Summer showlist     | <i>Escherichia</i> | <i>coli</i> | O26:H11  | 948-4              | Bovine | USA         | III                      |                          |                        |
| CDC                 | <i>Escherichia</i> | <i>coli</i> | O26:H11  | 97_3250            | Human  | USA         | I                        | JN871648                 |                        |
| ECRC - DECA         | <i>Escherichia</i> | <i>coli</i> | O26:H11  | 9A                 | Human  | USA         | I                        | JN871655                 | 11                     |
| ECRC - DECA         | <i>Escherichia</i> | <i>coli</i> | O26:H11  | 9B                 | Human  | USA         | I                        | JN871668                 | 11                     |
| ECRC - DECA         | <i>Escherichia</i> | <i>coli</i> | O26:H11  | 9C                 | Human  | Switzerland | I                        | JN871669                 | 11                     |
| Ben Green           | <i>Escherichia</i> | <i>coli</i> | O26      | B1_2               | Bovine | USA         | I                        | JN871665                 |                        |
| C. Park             | <i>Escherichia</i> | <i>coli</i> | O26:H11  | BERMUDEZ           | Human  | USA         | III                      |                          |                        |
| C. Park             | <i>Escherichia</i> | <i>coli</i> | O26:H11  | CHWIS              | Human  | USA         | III                      |                          |                        |
| EHEC 2              | <i>Escherichia</i> | <i>coli</i> | O26:H11  | CL5                | N/A    | N/A         | III                      |                          |                        |
| Fly Prevalence      | <i>Escherichia</i> | <i>coli</i> | O26      | D01016_1d_1        | Bovine | USA         | I                        | JN871657                 |                        |
| Fly Prevalence      | <i>Escherichia</i> | <i>coli</i> | O26      | D03004_3           | Bovine | USA         | I                        | JN871658                 |                        |
| Fly Prevalence      | <i>Escherichia</i> | <i>coli</i> | O26      | D04007_4           | Dairy  | USA         | I                        | JN871659                 |                        |
| ECRC - DECA         | <i>Escherichia</i> | <i>coli</i> | O26:H11  | DEC 10A            | Human  | Canada      | III                      |                          | 11                     |
| ECRC - DECA         | <i>Escherichia</i> | <i>coli</i> | O26:H11  | DEC 10D            | Bovine | France      | III                      |                          | 11                     |
| ECRC - DECA         | <i>Escherichia</i> | <i>coli</i> | O26:H11  | DEC 9D             | Human  | Denmark     | III                      |                          | 11                     |
| ECRC - DECA         | <i>Escherichia</i> | <i>coli</i> | O26:H11  | DEC 9E             | Human  | Mexico      | III                      |                          | 11                     |
| Feedlot Survey      | <i>Escherichia</i> | <i>coli</i> | O26      | F1_A4_1            | Dairy  | USA         | I                        | JN871660                 |                        |
| Feedlot Survey      | <i>Escherichia</i> | <i>coli</i> | O26      | F1_B3_1            | Bovine | USA         | I                        | JN871673                 |                        |
| Feedlot Survey      | <i>Escherichia</i> | <i>coli</i> | O26      | F11_205_1_2        | Bovine | USA         | I                        | JN871670                 |                        |
| Feedlot Survey      | <i>Escherichia</i> | <i>coli</i> | O26      | F12_432_4_1        | Bovine | USA         | I                        | JN871671                 |                        |
| Feedlot Survey      | <i>Escherichia</i> | <i>coli</i> | O26      | F13_25_1_5         | Bovine | USA         | I                        | JN871672                 |                        |
| Feedlot Survey      | <i>Escherichia</i> | <i>coli</i> | O26:H11  | F2 407-2-2         | Bovine | USA         | III                      |                          |                        |
| Feedlot Survey      | <i>Escherichia</i> | <i>coli</i> | O26:H46  | F3_13_1_3          | Bovine | USA         | I                        | JN871661                 |                        |
| Feedlot Survey      | <i>Escherichia</i> | <i>coli</i> | O26:H11  | F3_24_4_2          | Bovine | USA         | I                        | JN871674                 |                        |
| Feedlot Survey      | <i>Escherichia</i> | <i>coli</i> | O26      | F5_16_1_3          | Dairy  | USA         | I                        | JN871662                 |                        |
| Feedlot Survey      | <i>Escherichia</i> | <i>coli</i> | O26      | F5_4_3_2           | Bovine | USA         | I                        | JN871675                 |                        |
| ECRC                | <i>Escherichia</i> | <i>coli</i> | O26:H11  | H311b              | N/A    | N/A         | III                      |                          |                        |
| Fair 2002           | <i>Escherichia</i> | <i>coli</i> | O26:H11  | L1G18-1            | Goat   | USA         | III                      |                          |                        |
| Fair 2002           | <i>Escherichia</i> | <i>coli</i> | O26:H11  | L3S14_1            | Sheep  | USA         | I                        | JN871649                 | 4                      |

Supplemental Table 1. Bacterial strains used for sequencing and MALDI-TOF validation

| Collection                | Genus              | Species     | Serotype | Strain Designation | Source         | Country | Application <sup>a</sup> | Genbank accession number | Reference <sup>b</sup> |
|---------------------------|--------------------|-------------|----------|--------------------|----------------|---------|--------------------------|--------------------------|------------------------|
| MARC                      | <i>Escherichia</i> | <i>coli</i> | O26:H11  | 6629               | Bovine         | USA     | II                       | JN871643                 |                        |
| Fair 2002                 | <i>Escherichia</i> | <i>coli</i> | O26:H11  | MB21-1             | Bovine         | USA     | III                      |                          |                        |
| Fair 2002                 | <i>Escherichia</i> | <i>coli</i> | O26:H11  | N5D43-1            | Bovine         | USA     | III                      |                          |                        |
| Fair 2002                 | <i>Escherichia</i> | <i>coli</i> | O26:H11  | N9S2-1             | Sheep          | USA     | III                      |                          |                        |
| North Platte Exp. Station | <i>Escherichia</i> | <i>coli</i> | O26:H11  | NP2_2              | Environment    | USA     | I                        | JN871676                 |                        |
| U of Georgia              | <i>Escherichia</i> | <i>coli</i> | O26:H11  | P1331              | N/A            | USA     | III                      |                          |                        |
| Fair 2003                 | <i>Escherichia</i> | <i>coli</i> | O26:H11  | P5_1               | Bovine         | USA     | I                        | JN871650                 |                        |
| ZOO 2004                  | <i>Escherichia</i> | <i>coli</i> | O26      | R28_5_1B           | Chicken        | USA     | I                        | JN871619                 |                        |
| ZOO 2004                  | <i>Escherichia</i> | <i>coli</i> | O26      | R32_14_1F          | Goat           | USA     | I                        | JN871614                 |                        |
| ZOO 2004                  | <i>Escherichia</i> | <i>coli</i> | O26      | R43_4_1            | Bovine         | USA     | I                        | JN871664                 |                        |
| EHEC 2                    | <i>Escherichia</i> | <i>coli</i> | O26:H11  | TW01200            | Human          | USA     | III                      |                          |                        |
| Durso Blind Panel         | <i>Escherichia</i> | <i>coli</i> | O26:H32  | TW01209            | Human          | N/A     | I                        | JN871615                 |                        |
| Durso Blind Panel         | <i>Escherichia</i> | <i>coli</i> | O26:H36  | TW01221            | Human          | N/A     | I                        | JN871634                 |                        |
| EHEC 2                    | <i>Escherichia</i> | <i>coli</i> | O26:H11  | TW02295            | Human          | N/A     | III                      |                          |                        |
| EHEC 2                    | <i>Escherichia</i> | <i>coli</i> | O26:H11  | TW04272            | Human          | USA     | III                      |                          |                        |
| EHEC 2                    | <i>Escherichia</i> | <i>coli</i> | O26:H11  | TW05070            | Human          | Chile   | III                      |                          |                        |
| Durso Blind Panel         | <i>Escherichia</i> | <i>coli</i> | O26:H11  | TW07154            | N/A            | N/A     | I                        | JN871667                 |                        |
| Durso Blind Panel         | <i>Escherichia</i> | <i>coli</i> | O26:H32  | TW07187            | N/A            | N/A     | I                        | JN871616                 |                        |
| Durso Blind Panel         | <i>Escherichia</i> | <i>coli</i> | O26:H11  | TW07622            | N/A            | N/A     | I                        | JN871651                 |                        |
| Durso Blind Panel         | <i>Escherichia</i> | <i>coli</i> | O26:H11  | TW07705            | N/A            | N/A     | I                        | JN871652                 |                        |
| Durso Blind Panel         | <i>Escherichia</i> | <i>coli</i> | O26:H11  | TW07872            | N/A            | N/A     | I                        | JN871653                 |                        |
| Durso Blind Panel         | <i>Escherichia</i> | <i>coli</i> | O26:H11  | TW08637            | Human          | N/A     | I                        | JN871631                 |                        |
| Durso Blind Panel         | <i>Escherichia</i> | <i>coli</i> | O26:H11  | TW08998            | Human          | Germany | I                        | JN871654                 |                        |
| Durso Blind Panel         | <i>Escherichia</i> | <i>coli</i> | O26:H11  | TW09156            | N/A            | Uruguay | I                        | JN871632                 |                        |
| C. Park                   | <i>Escherichia</i> | <i>coli</i> | O26:H11  | WAR                | Human          | USA     | III                      |                          |                        |
| CDC                       | <i>Escherichia</i> | <i>coli</i> | O45      | 06-224             | Human          | USA     | I                        | JN859205                 |                        |
| MARC NOR                  | <i>Escherichia</i> | <i>coli</i> | O45      | WDG-3              | Bovine         | USA     | I                        | JN859207                 |                        |
| CDC - O STD's             | <i>Escherichia</i> | <i>coli</i> | O45:H10  | H61                | N/A            | USA     | I                        | JN859208                 |                        |
| C. Park                   | <i>Escherichia</i> | <i>coli</i> | O45:H2   | ALLG               | Human          | USA     | I                        | JN859202                 |                        |
| C. Park                   | <i>Escherichia</i> | <i>coli</i> | O45:H2   | COU                | Human          | USA     | I                        | JN859203                 |                        |
| CDC                       | <i>Escherichia</i> | <i>coli</i> | O45:H2   | A9619-C2           | Human          | USA     | I                        | JN859204                 |                        |
| ECRC - DECA               | <i>Escherichia</i> | <i>coli</i> | O45:H2   | 11C                | Human          | USA     | I                        | JN859201                 | 11                     |
| MARC MSQRU                | <i>Escherichia</i> | <i>coli</i> | O45:H2   | G4                 | N/A            | USA     | I                        | JN859200                 |                        |
| MARC MSQRU                | <i>Escherichia</i> | <i>coli</i> | O45:H2   | H3                 | N/A            | USA     | I                        | JN859206                 |                        |
| MARC NOR                  | <i>Escherichia</i> | <i>coli</i> | O45:H2   | 015-1269           | Human          | USA     | I                        | JN859199                 |                        |
| ECRC                      | <i>Escherichia</i> | <i>coli</i> | O45:H4   | 87.1085            | N/A            | N/A     | I                        | JN859197                 |                        |
| ECRC                      | <i>Escherichia</i> | <i>coli</i> | O45:H4   | 89.0609            | N/A            | N/A     | I                        | JN859198                 |                        |
| ECRC                      | <i>Escherichia</i> | <i>coli</i> | O103     | 0_1623             | Whitetail deer | N/A     | I                        | JN862617                 |                        |
| ECRC                      | <i>Escherichia</i> | <i>coli</i> | O103:H11 | 83_1306            | N/A            | N/A     | I                        | JN862600                 |                        |
| ECRC                      | <i>Escherichia</i> | <i>coli</i> | O103:H11 | 86_0765            | Mouse          | N/A     | I                        | JN862598                 |                        |
| ECRC                      | <i>Escherichia</i> | <i>coli</i> | O103:H21 | 86_1202            | N/A            | N/A     | I                        | JN862597                 |                        |
| ECRC                      | <i>Escherichia</i> | <i>coli</i> | O103     | 87_1368            | Goat           | N/A     | I                        | JN862616                 |                        |
| ECRC                      | <i>Escherichia</i> | <i>coli</i> | O103     | 90.0393            | Bovine         | N/A     | III                      |                          |                        |

Supplemental Table 1. Bacterial strains used for sequencing and MALDI-TOF validation

| Collection        | Genus              | Species     | Serotype | Strain Designation | Source | Country | Application <sup>a</sup> | Genbank accession number | Reference <sup>b</sup> |
|-------------------|--------------------|-------------|----------|--------------------|--------|---------|--------------------------|--------------------------|------------------------|
| ECRC              | <i>Escherichia</i> | <i>coli</i> | O103:H4  | 92_0898            | N/A    | N/A     | I                        | JN862599                 |                        |
| ECRC              | <i>Escherichia</i> | <i>coli</i> | O103:H2  | 93_0624            | Human  | N/A     | I                        | JN862606                 |                        |
| ECRC              | <i>Escherichia</i> | <i>coli</i> | O103     | 95.3771            | Human  | N/A     | III                      |                          |                        |
| ECRC              | <i>Escherichia</i> | <i>coli</i> | O103     | 95_3772            | Human  | N/A     | I                        | JN862601                 |                        |
| ECRC              | <i>Escherichia</i> | <i>coli</i> | O103     | 97_1377            | Cattle | N/A     | I                        | JN862607                 |                        |
| ECRC              | <i>Escherichia</i> | <i>coli</i> | O103     | 98_1717            | Dog    | N/A     | I                        | JN862604                 |                        |
| ECRC              | <i>Escherichia</i> | <i>coli</i> | O103     | 98_2051            | Water  | N/A     | I                        | JN862595                 |                        |
| ECRC              | <i>Escherichia</i> | <i>coli</i> | O103     | 99_1792            | Human  | N/A     | I                        | JN862614                 |                        |
| ECRC              | <i>Escherichia</i> | <i>coli</i> | O103     | 99_1806            | Human  | N/A     | I                        | JN862615                 |                        |
| ECRC              | <i>Escherichia</i> | <i>coli</i> | O103     | 99_1807            | Human  | N/A     | I                        | JN862613                 |                        |
| ECRC              | <i>Escherichia</i> | <i>coli</i> | O103     | 99.1822            | Human  | N/A     | III                      |                          |                        |
| IDPHD             | <i>Escherichia</i> | <i>coli</i> | O103:H25 | 6582               | Human  | USA     | I                        | JN862603                 |                        |
| IDPHD             | <i>Escherichia</i> | <i>coli</i> | O103:H11 | 11868              | Human  | USA     | III                      |                          |                        |
| IDPHD             | <i>Escherichia</i> | <i>coli</i> | O103:H2  | 12390              | Human  | USA     | III                      |                          |                        |
| IDPHD             | <i>Escherichia</i> | <i>coli</i> | O103:H2  | 12442              | Human  | USA     | III                      |                          |                        |
| IDPHD             | <i>Escherichia</i> | <i>coli</i> | O103:H2  | 12442              | Human  | USA     | I                        | JN862602                 |                        |
| IDPHD             | <i>Escherichia</i> | <i>coli</i> | O103:H11 | 13075              | Human  | USA     | I                        | JN862611                 |                        |
| IDPHD             | <i>Escherichia</i> | <i>coli</i> | O103:H2  | 14141              | Human  | USA     | III                      |                          |                        |
| IDPHD             | <i>Escherichia</i> | <i>coli</i> | O103:H11 | 15123              | Human  | USA     | III                      |                          |                        |
| SDSU              | <i>Escherichia</i> | <i>coli</i> | O103:NM  | 89_118             | N/A    | USA     | I                        | JN862610                 |                        |
| CDC - O STD's     | <i>Escherichia</i> | <i>coli</i> | O103:H8  | H_515b             | N/A    | USA     | I                        | JN862596                 |                        |
| C. Park           | <i>Escherichia</i> | <i>coli</i> | O103     | MAH                | Human  | USA     | I                        | JN862609                 |                        |
| C. Park           | <i>Escherichia</i> | <i>coli</i> | O103     | PARA               | Human  | USA     | I                        | JN862605                 |                        |
| Durso Blind Panel | <i>Escherichia</i> | <i>coli</i> | O103:H2  | TW08640            | Human  | N/A     | I                        | JN862612                 |                        |
| Durso Blind Panel | <i>Escherichia</i> | <i>coli</i> | O103:H11 | TW08872            | N/A    | N/A     | I                        | JN862608                 |                        |
| ECRC              | <i>Escherichia</i> | <i>coli</i> | O111:H8  | 0.1932             | Bovine | N/A     | III                      |                          |                        |
| ECRC              | <i>Escherichia</i> | <i>coli</i> | O111:H8  | 0.2056             | Bovine | N/A     | III                      |                          |                        |
| Acheson - MA      | <i>Escherichia</i> | <i>coli</i> | O111:H8  | 18                 | Human  | USA     | I                        | JN887664                 | 4, 5                   |
| MARC              | <i>Escherichia</i> | <i>coli</i> | O111:H8  | 1074               | Bovine | USA     | II                       | JN887665                 | 4                      |
| ECRC              | <i>Escherichia</i> | <i>coli</i> | O111:H8  | 94.0718            | Bovine | N/A     | III                      |                          |                        |
| ECRC              | <i>Escherichia</i> | <i>coli</i> | O111:H8  | 99.09              | Human  | N/A     | III                      |                          |                        |
| ECRC              | <i>Escherichia</i> | <i>coli</i> | O111:H8  | 99.1169            | Bovine | N/A     | III                      |                          |                        |
| IDPHD             | <i>Escherichia</i> | <i>coli</i> | O111:H8  | 8234               | Human  | USA     | III                      |                          |                        |
| IDPHD             | <i>Escherichia</i> | <i>coli</i> | O111:H8  | 8361               | Human  | USA     | III                      |                          |                        |
| IDPHD             | <i>Escherichia</i> | <i>coli</i> | O111:H8  | 9662               | Human  | USA     | II                       | JN887666                 |                        |
| IDPHD             | <i>Escherichia</i> | <i>coli</i> | O111:H8  | 11474              | Human  | USA     | III                      |                          |                        |
| IDPHD             | <i>Escherichia</i> | <i>coli</i> | O111:H8  | 11936              | Human  | USA     | III                      |                          |                        |
| IDPHD             | <i>Escherichia</i> | <i>coli</i> | O111:H8  | 12893              | Human  | USA     | III                      |                          |                        |
| IDPHD             | <i>Escherichia</i> | <i>coli</i> | O111:H8  | 14614              | Human  | USA     | III                      |                          |                        |
| IDPHD             | <i>Escherichia</i> | <i>coli</i> | O111:H8  | 14892              | Human  | USA     | III                      |                          |                        |
| IDPHD             | <i>Escherichia</i> | <i>coli</i> | O111:H8  | 14895              | Human  | USA     | III                      |                          |                        |
| ATCC              | <i>Escherichia</i> | <i>coli</i> | O111:NM  | 43887              | Human  | N/A     | I                        | JN887676                 | 4, 5                   |
| NYDH              | <i>Escherichia</i> | <i>coli</i> | O111     | 04-11953           | Human  | Canada  | I                        | JN887644                 |                        |

Supplemental Table 1. Bacterial strains used for sequencing and MALDI-TOF validation

| Collection          | Genus              | Species     | Serotype | Strain Designation | Source | Country   | Application <sup>a</sup> | Genbank accession number | Reference <sup>b</sup> |
|---------------------|--------------------|-------------|----------|--------------------|--------|-----------|--------------------------|--------------------------|------------------------|
| Pop. GF             | <i>Escherichia</i> | <i>coli</i> | O111:H8  | 0474-5             | Bovine | USA       | III                      |                          |                        |
| Winter Showlist     | <i>Escherichia</i> | <i>coli</i> | O111:H8  | 1056-1             | Bovine | USA       | III                      |                          |                        |
| ECRC - DECA         | <i>Escherichia</i> | <i>coli</i> | O111:H2  | 12A                | Human  | England   | I                        | JN887673                 | 11                     |
| ECRC - DECA         | <i>Escherichia</i> | <i>coli</i> | O111:H2  | 12B                | Human  | USA       | I                        | JN887682                 | 11                     |
| ECRC - DECA         | <i>Escherichia</i> | <i>coli</i> | O111:HN  | 12C                | Human  | Panama    | III                      |                          |                        |
| ECRC - DECA         | <i>Escherichia</i> | <i>coli</i> | O111:H2  | 12D                | Human  | Peru      | I                        | JN887683                 | 11                     |
| ECRC - DECA         | <i>Escherichia</i> | <i>coli</i> | O111:HN  | 12E                | Human  | Kenya     | I                        | JN887685                 | 11                     |
| ECRC - DECA         | <i>Escherichia</i> | <i>coli</i> | O111:H21 | 15A                | Human  | USA       | III                      |                          |                        |
| ECRC - DECA         | <i>Escherichia</i> | <i>coli</i> | O111:H21 | 15B                | Human  | USA       | I                        | JN887678                 | 11                     |
| ECRC - DECA         | <i>Escherichia</i> | <i>coli</i> | O111:H21 | 15C                | Human  | USA       | I                        | JN887680                 | 11                     |
| ECRC - DECA         | <i>Escherichia</i> | <i>coli</i> | O111:H21 | 15D                | Human  | USA       | I                        | JN887681                 | 11                     |
| ECRC - DECA         | <i>Escherichia</i> | <i>coli</i> | O111:H21 | 15E                | Human  | USA       | I                        | JN887679                 | 11                     |
| ECRC                | <i>Escherichia</i> | <i>coli</i> | O111:H8  | 3007-85            | Human  | USA       | I                        | JN887660                 | 4, 5                   |
| MARC                | <i>Escherichia</i> | <i>coli</i> | O111:H8  | 4-1                | Bovine | USA       | III                      |                          |                        |
| IDPHD               | <i>Escherichia</i> | <i>coli</i> | O111:H8  | 6617               | Human  | USA       | III                      |                          |                        |
| ECRC - DECA         | <i>Escherichia</i> | <i>coli</i> | O111:H21 | 6A                 | Human  | USA       | I                        | JN887686                 | 11                     |
| ECRC - DECA         | <i>Escherichia</i> | <i>coli</i> | O111:H12 | 6B                 | Human  | Germany   | I                        | JN887687                 | 5, 11                  |
| ECRC - DECA         | <i>Escherichia</i> | <i>coli</i> | O111:H12 | 6C                 | Human  | Guatemala | I                        | JN887674                 | 11                     |
| ECRC - DECA         | <i>Escherichia</i> | <i>coli</i> | O111:H12 | 6D                 | Human  | Italy     | I                        | JN887688                 | 11                     |
| ECRC - DECA         | <i>Escherichia</i> | <i>coli</i> | O111:HN  | 6E                 | Human  | Brazil    | I                        | JN887689                 | 11                     |
| Fly Prevalence 2007 | <i>Escherichia</i> | <i>coli</i> | O111:H8  | 7-11 88A           | Fly    | USA       | III                      |                          |                        |
| Fly Prevalence 2007 | <i>Escherichia</i> | <i>coli</i> | O111:H8  | 7-14 10A           | Bovine | USA       | III                      |                          |                        |
| Fly Prevalence 2007 | <i>Escherichia</i> | <i>coli</i> | O111:H8  | 7-15 17A           | Bovine | USA       | III                      |                          |                        |
| Fly Prevalence 2007 | <i>Escherichia</i> | <i>coli</i> | O111:H8  | 7-16 37A           | Bovine | USA       | III                      |                          |                        |
| Fly Prevalence 2007 | <i>Escherichia</i> | <i>coli</i> | O111:H8  | 7-16 64A           | Fly    | USA       | III                      |                          |                        |
| Fly Prevalence 2007 | <i>Escherichia</i> | <i>coli</i> | O111:H8  | 7-16 69A           | Fly    | USA       | III                      |                          |                        |
| Fly Prevalence 2007 | <i>Escherichia</i> | <i>coli</i> | O111:H8  | 7-20 65A           | Fly    | USA       | III                      |                          |                        |
| Fly Prevalence 2007 | <i>Escherichia</i> | <i>coli</i> | O111:H8  | 7-22 6A            | Bovine | USA       | III                      |                          |                        |
| Fly Prevalence 2007 | <i>Escherichia</i> | <i>coli</i> | O111:H8  | 7-26 8A            | Bovine | USA       | III                      |                          |                        |
| Fly Prevalence 2007 | <i>Escherichia</i> | <i>coli</i> | O111:H8  | 7-27 20A           | Bovine | USA       | I                        | JN887655                 |                        |
| Fly Prevalence 2007 | <i>Escherichia</i> | <i>coli</i> | O111:H8  | 7-32 9A            | Bovine | USA       | III                      |                          |                        |
| Fly Prevalence 2007 | <i>Escherichia</i> | <i>coli</i> | O111:H8  | 7-33 12A           | Bovine | USA       | III                      |                          |                        |
| Fly Prevalence 2007 | <i>Escherichia</i> | <i>coli</i> | O111:H8  | 7-45 80A           | Fly    | USA       | I                        | JN887662                 |                        |
| Fly Prevalence 2007 | <i>Escherichia</i> | <i>coli</i> | O111:H8  | 7-51 19A           | Bovine | USA       | III                      |                          |                        |
| Fly Prevalence 2007 | <i>Escherichia</i> | <i>coli</i> | O111:H8  | 7-54 11A           | Bovine | USA       | III                      |                          |                        |
| Fly Prevalence 2007 | <i>Escherichia</i> | <i>coli</i> | O111:H8  | 7-54 68A           | Fly    | USA       | III                      |                          |                        |
| Fly Prevalence 2007 | <i>Escherichia</i> | <i>coli</i> | O111:H8  | 7-55 62A           | Fly    | USA       | III                      |                          |                        |
| Fly Prevalence 2007 | <i>Escherichia</i> | <i>coli</i> | O111:H8  | 7-56 3B            | Bovine | USA       | III                      |                          |                        |
| Fly Prevalence 2007 | <i>Escherichia</i> | <i>coli</i> | O111:H8  | 7-58 72A           | Fly    | USA       | I                        | JN887656                 |                        |
| IDPHD               | <i>Escherichia</i> | <i>coli</i> | O111:H8  | 7364               | Human  | USA       | III                      |                          |                        |
| ECRC                | <i>Escherichia</i> | <i>coli</i> | O111:H7  | 82_0549            | N/A    | N/A       | I                        | JN887684                 | 5                      |
| ECRC                | <i>Escherichia</i> | <i>coli</i> | O111:H4  | 87-0518            | N/A    | N/A       | I                        | JN887670                 | 4, 5                   |
| ECRC                | <i>Escherichia</i> | <i>coli</i> | O111:H11 | 87-1377            | Bovine | USA       | I                        | JN887648                 |                        |

Supplemental Table 1. Bacterial strains used for sequencing and MALDI-TOF validation

| Collection       | Genus              | Species     | Serotype | Strain Designation | Source | Country  | Application <sup>a</sup> | Genbank accession number | Reference <sup>b</sup> |
|------------------|--------------------|-------------|----------|--------------------|--------|----------|--------------------------|--------------------------|------------------------|
| ECRC             | <i>Escherichia</i> | <i>coli</i> | O111:H11 | 87-1883            | Bovine | USA      | I                        | JN887653                 |                        |
| ECRC             | <i>Escherichia</i> | <i>coli</i> | O111:H11 | 87-1917            | Swine  | USA      | I                        | JN887651                 | 4                      |
| ECRC             | <i>Escherichia</i> | <i>coli</i> | O111:H11 | 88-0502            | Bovine | USA      | I                        | JN887652                 |                        |
| SDSU             | <i>Escherichia</i> | <i>coli</i> | O111:NM  | 88-19539           | N/A    | USA      | I                        | JN887649                 | 4, 5                   |
| SDSU             | <i>Escherichia</i> | <i>coli</i> | O111:H11 | 88-4110            | N/A    | USA      | I                        | JN887646                 | 4, 5                   |
| ECRC - DECA      | <i>Escherichia</i> | <i>coli</i> | O111:H8  | 8A                 | Human  | USA      | III                      |                          |                        |
| ECRC - DECA      | <i>Escherichia</i> | <i>coli</i> | O111:H8  | 8B                 | Human  | USA      | III                      |                          |                        |
| ECRC - DECA      | <i>Escherichia</i> | <i>coli</i> | O111:HN  | 8C                 | Calf   | USA      | I                        | JN887647                 | 11                     |
| ECRC - DECA      | <i>Escherichia</i> | <i>coli</i> | O111:H11 | 8D                 | Human  | Cuba     | I                        | JN887668                 | 11                     |
| ECRC - DECA      | <i>Escherichia</i> | <i>coli</i> | O111:H8  | 8E                 | Human  | Denmark  | I                        | JN887659                 | 11                     |
| Acheson - MA     | <i>Escherichia</i> | <i>coli</i> | O111:H8  | 9-54               | Human  | USA      | III                      |                          |                        |
| ECRC             | <i>Escherichia</i> | <i>coli</i> | O111:H8  | 90.0101            | Bovine | N/A      | III                      |                          |                        |
| ECRC             | <i>Escherichia</i> | <i>coli</i> | O111:H8  | 90.0102            | Bovine | N/A      | III                      |                          |                        |
| ECRC             | <i>Escherichia</i> | <i>coli</i> | O111:H8  | 95-0122            | N/A    | N/A      | III                      |                          |                        |
| ECRC             | <i>Escherichia</i> | <i>coli</i> | O111     | 96-0533            | Turkey | N/A      | I                        | JN887672                 | 4                      |
| ECRC             | <i>Escherichia</i> | <i>coli</i> | O111     | 96-1487            | Human  | N/A      | I                        | JN887667                 | 4                      |
| ECRC             | <i>Escherichia</i> | <i>coli</i> | O111     | 98-0136            | Swine  | N/A      | I                        | JN887671                 | 4                      |
| ECRC             | <i>Escherichia</i> | <i>coli</i> | O111:H8  | 99.1145            | Bovine | N/A      | III                      |                          |                        |
| ZOO              | <i>Escherichia</i> | <i>coli</i> | O111:H8  | A010005-1          | Sheep  | N/A      | III                      |                          |                        |
| U. of CA, Riley  | <i>Escherichia</i> | <i>coli</i> | O111     | B171               | N/A    | USA      | I                        | JN887677                 | 4, 5                   |
| TX-DH            | <i>Escherichia</i> | <i>coli</i> | O111:H8  | BE 00749           | N/A    | USA      | III                      |                          |                        |
| TX-DH            | <i>Escherichia</i> | <i>coli</i> | O111:H8  | BE-99-1202         | N/A    | USA      | III                      |                          |                        |
| State Flies      | <i>Escherichia</i> | <i>coli</i> | O111:H8  | FL43-1             | Bovine | USA      | III                      |                          |                        |
| State Flies      | <i>Escherichia</i> | <i>coli</i> | O111:H8  | GF6-1              | Fly    | USA      | III                      |                          |                        |
| Fly - Cohort     | <i>Escherichia</i> | <i>coli</i> | O111     | GY3-1              | Fly    | USA      | I                        | JN887690                 |                        |
| TN Face Fly 2003 | <i>Escherichia</i> | <i>coli</i> | O111:H8  | H36-1              | Bovine | USA      | III                      |                          |                        |
| Ohio Hamburger   | <i>Escherichia</i> | <i>coli</i> | O111:H8  | HB133-1BG          | Bovine | USA      | III                      |                          |                        |
| Fair 2002        | <i>Escherichia</i> | <i>coli</i> | O111:H8  | L1G30-1A           | Goat   | USA      | III                      |                          |                        |
| Fair 2002        | <i>Escherichia</i> | <i>coli</i> | O111:H8  | L3S15-2            | Sheep  | USA      | III                      |                          |                        |
| MARC             | <i>Escherichia</i> | <i>coli</i> | O111:H8  | MARC 1074-2        | Bovine | USA      | III                      |                          |                        |
| State Flies      | <i>Escherichia</i> | <i>coli</i> | O111:H8  | NCF4-3             | Fly    | USA      | III                      |                          |                        |
| Fair 2002        | <i>Escherichia</i> | <i>coli</i> | O111:H8  | PG12-1             | Goat   | USA      | III                      |                          |                        |
| C. Park          | <i>Escherichia</i> | <i>coli</i> | O111:H8  | PLAV               | Human  | USA      | I                        | JN887657                 |                        |
| C. Park          | <i>Escherichia</i> | <i>coli</i> | O111:H8  | SCHAF              | Human  | USA      | III                      |                          |                        |
| Fair 2003        | <i>Escherichia</i> | <i>coli</i> | O111:H8  | SF26 102-1         | Bovine | USA      | III                      |                          |                        |
| TN Face Fly 2003 | <i>Escherichia</i> | <i>coli</i> | O111:H8  | SF4-1              | Fly    | USA      | III                      |                          |                        |
| ECRC             | <i>Escherichia</i> | <i>coli</i> | O111:NM  | Stoke W            | N/A    | N/A      | I                        | JN887675                 | 4, 5                   |
| EHEC 2           | <i>Escherichia</i> | <i>coli</i> | O111:H8  | TW00970            | Human  | USA      | II                       |                          | 10                     |
| EHEC 2           | <i>Escherichia</i> | <i>coli</i> | O111:H8  | TW01387            | Human  | Canada   | I                        | JN887661                 | 4, 10                  |
| EHEC 2           | <i>Escherichia</i> | <i>coli</i> | O111:H8  | TW04257            | Human  | USA      | I                        | JN887658                 | 4, 5, 10               |
| EHEC 2           | <i>Escherichia</i> | <i>coli</i> | O111:H8  | TW04519            | Calf   | Scotland | III                      |                          |                        |
| EHEC 2           | <i>Escherichia</i> | <i>coli</i> | O111:H8  | TW05614            | Human  | Germany  | III                      |                          |                        |
| EHEC 2           | <i>Escherichia</i> | <i>coli</i> | O111:H8  | TW05651            | Human  | Italy    | III                      |                          |                        |

Supplemental Table 1. Bacterial strains used for sequencing and MALDI-TOF validation

| Collection        | Genus              | Species     | Serotype  | Strain Designation | Source        | Country | Application <sup>a</sup> | Genbank accession number | Reference <sup>b</sup> |
|-------------------|--------------------|-------------|-----------|--------------------|---------------|---------|--------------------------|--------------------------|------------------------|
| EHEC 2            | <i>Escherichia</i> | <i>coli</i> | O111:H8   | TW07502            | Human         | Germany | I                        | JN887654                 | 4, 5, 10               |
| Durso Blind Panel | <i>Escherichia</i> | <i>coli</i> | O111:H8   | TW07926            | Human         | USA     | III                      | JN887645                 |                        |
| Durso Blind Panel | <i>Escherichia</i> | <i>coli</i> | O111:H11  | TW03810            | N/A           | N/A     | III                      | JN887669                 |                        |
| Durso Blind Panel | <i>Escherichia</i> | <i>coli</i> | O111:H11  | TW05355            | Human         | Canada  | III                      | JN887650                 |                        |
| CDC - O STD's     | <i>Escherichia</i> | <i>coli</i> | O121:H10  | W39                | N/A           | USA     | I                        | JN859209                 |                        |
| CDC               | <i>Escherichia</i> | <i>coli</i> | O121:H19  | 3056_85            | Human         | USA     | I                        | JN859216                 |                        |
| Durso Blind Panel | <i>Escherichia</i> | <i>coli</i> | O121:H19  | TW08868            | Human         | USA     | I                        | JN859213                 |                        |
| IDPHD             | <i>Escherichia</i> | <i>coli</i> | O121:H19  | 5518               | Human         | USA     | I                        | JN859215                 |                        |
| IDPHD             | <i>Escherichia</i> | <i>coli</i> | O121:H19  | 13247              | Human         | USA     | I                        | JN859217                 |                        |
| IDPHD             | <i>Escherichia</i> | <i>coli</i> | O121:H19  | 11287              | Human         | USA     | I                        | JN859218                 |                        |
| IDPHD             | <i>Escherichia</i> | <i>coli</i> | O121:H19  | 6507               | Human         | USA     | I                        | JN859220                 |                        |
| IDPHD             | <i>Escherichia</i> | <i>coli</i> | O121:H19  | 11215              | Human         | USA     | I                        | JN859219                 |                        |
| ECRC              | <i>Escherichia</i> | <i>coli</i> | O121:H7   | 86_0698            | N/A           | N/A     | I                        | JN859210                 |                        |
| ECRC              | <i>Escherichia</i> | <i>coli</i> | O121:H7   | 90_0373            | N/A           | N/A     | I                        | JN859211                 |                        |
| ECRC - ECOR       | <i>Escherichia</i> | <i>coli</i> | O121:HN   | EC21               | Bovine        | N/A     | I                        | JN859212                 | 9                      |
| IDPHD             | <i>Escherichia</i> | <i>coli</i> | O121:NM   | 9918               | Human         | USA     | I                        | JN859214                 |                        |
| MARC              | <i>Escherichia</i> | <i>coli</i> | O145:Hneg | 307A2              | Packing Plant | USA     | I                        | JN850043                 |                        |
| CDC - O STD's     | <i>Escherichia</i> | <i>coli</i> | O145:NM   | E1385              | N/A           | USA     | I                        | JN850039                 |                        |
| IDPHD             | <i>Escherichia</i> | <i>coli</i> | O145:NM   | 6896               | Human         | USA     | I                        | JN850044                 |                        |
| IDPHD             | <i>Escherichia</i> | <i>coli</i> | O145:NM   | 6940               | Human         | USA     | I                        | JN850040                 |                        |
| IDPHD             | <i>Escherichia</i> | <i>coli</i> | O145:NM   | 8235               | Human         | USA     | I                        | JN850041                 |                        |
| IDPHD             | <i>Escherichia</i> | <i>coli</i> | O145:NM   | 14728              | Human         | USA     | I                        | JN850042                 |                        |
| USMARC            | <i>Escherichia</i> | <i>coli</i> | O157:H7   | CO 1185-1          | Bovine        | USA     | III                      |                          | 1, 2                   |
| USMARC            | <i>Escherichia</i> | <i>coli</i> | O157:H7   | CO 147-1           | Bovine        | USA     | III                      |                          | 1, 2                   |
| USMARC            | <i>Escherichia</i> | <i>coli</i> | O157:H7   | CO 50-1            | Bovine        | USA     | III                      |                          | 1, 2                   |
| USMARC            | <i>Escherichia</i> | <i>coli</i> | O157:H7   | CO 713-5           | Bovine        | USA     | III                      |                          | 1, 2                   |
| USMARC            | <i>Escherichia</i> | <i>coli</i> | O157:H7   | KS 1534-4A         | Bovine        | USA     | III                      |                          | 1, 2                   |
| USMARC            | <i>Escherichia</i> | <i>coli</i> | O157:H7   | KS 368-1           | Bovine        | USA     | III                      |                          | 1, 2                   |
| USMARC            | <i>Escherichia</i> | <i>coli</i> | O157:H7   | KS 411-1           | Bovine        | USA     | III                      |                          | 1, 2                   |
| USMARC            | <i>Escherichia</i> | <i>coli</i> | O157:H7   | KS 448-1           | Bovine        | USA     | III                      |                          | 1, 2                   |
| USMARC            | <i>Escherichia</i> | <i>coli</i> | O157:H7   | KS 546             | Bovine        | USA     | III                      |                          | 1, 2                   |
| USMARC            | <i>Escherichia</i> | <i>coli</i> | O157:H7   | LSU 56             | Bovine        | USA     | III                      |                          | 1, 2                   |
| USMARC            | <i>Escherichia</i> | <i>coli</i> | O157:H7   | LSU 58             | Bovine        | USA     | III                      |                          | 1, 2                   |
| USMARC            | <i>Escherichia</i> | <i>coli</i> | O157:H7   | MARC 6635-2        | Bovine        | USA     | III                      |                          | 1, 2                   |
| USMARC            | <i>Escherichia</i> | <i>coli</i> | O157:H7   | NE 1060-1          | Bovine        | USA     | III                      |                          | 1, 2                   |
| USMARC            | <i>Escherichia</i> | <i>coli</i> | O157:H7   | NE 1092-2          | Bovine        | USA     | III                      |                          | 1, 2                   |
| USMARC            | <i>Escherichia</i> | <i>coli</i> | O157:H7   | NE 1127-1          | Bovine        | USA     | III                      |                          | 1, 2                   |
| USMARC            | <i>Escherichia</i> | <i>coli</i> | O157:H7   | NE 1169-1          | Bovine        | USA     | III                      |                          | 1, 2                   |
| USMARC            | <i>Escherichia</i> | <i>coli</i> | O157:H7   | NE 122-1           | Bovine        | USA     | III                      |                          | 1, 2                   |
| USMARC            | <i>Escherichia</i> | <i>coli</i> | O157:H7   | NE 1270-2          | Bovine        | USA     | III                      |                          | 1, 2                   |
| USMARC            | <i>Escherichia</i> | <i>coli</i> | O157:H7   | NE 1370-3          | Bovine        | USA     | III                      |                          | 1, 2                   |
| USMARC            | <i>Escherichia</i> | <i>coli</i> | O157:H7   | NE 5-1             | Bovine        | USA     | III                      |                          | 1, 2                   |
| USMARC            | <i>Escherichia</i> | <i>coli</i> | O157:H7   | NE 81-1            | Bovine        | USA     | III                      |                          | 1, 2                   |

Supplemental Table 1. Bacterial strains used for sequencing and MALDI-TOF validation

| Collection   | Genus              | Species     | Serotype | Strain Designation | Source | Country | Application <sup>a</sup> | Genbank accession number | Reference <sup>b</sup> |
|--------------|--------------------|-------------|----------|--------------------|--------|---------|--------------------------|--------------------------|------------------------|
| USMARC       | <i>Escherichia</i> | <i>coli</i> | O157:H7  | NE 92-1            | Bovine | USA     | III                      |                          | 1, 2                   |
| USMARC       | <i>Escherichia</i> | <i>coli</i> | O157:H7  | NE 972-1           | Bovine | USA     | III                      |                          | 1, 2                   |
| USMARC       | <i>Escherichia</i> | <i>coli</i> | O157:H7  | Show KS 470-1      | Bovine | USA     | III                      |                          | 1, 2                   |
| USMARC       | <i>Escherichia</i> | <i>coli</i> | O157:H7  | Show NE 175-1      | Bovine | USA     | III                      |                          | 1, 2                   |
| USMARC       | <i>Escherichia</i> | <i>coli</i> | O157:H7  | Show NE 184-1      | Bovine | USA     | III                      |                          | 1, 2                   |
| USMARC       | <i>Escherichia</i> | <i>coli</i> | O157:H7  | Show NE 235-1      | Bovine | USA     | III                      |                          | 1, 2                   |
| USMARC       | <i>Escherichia</i> | <i>coli</i> | O157:H7  | SS CO 81-1         | Bovine | USA     | III                      |                          | 1, 2                   |
| USMARC       | <i>Escherichia</i> | <i>coli</i> | O157:H7  | SS NE 1040-1       | Bovine | USA     | III                      |                          | 1, 2                   |
| USMARC       | <i>Escherichia</i> | <i>coli</i> | O157:H7  | SS NE 1183-1       | Bovine | USA     | III                      |                          | 1, 2                   |
| USMARC       | <i>Escherichia</i> | <i>coli</i> | O157:H7  | SS NE 1339-1       | Bovine | USA     | III                      |                          | 1, 2                   |
| USMARC       | <i>Escherichia</i> | <i>coli</i> | O157:H7  | SS NE 1400-1       | Bovine | USA     | III                      |                          | 1, 2                   |
| USMARC       | <i>Escherichia</i> | <i>coli</i> | O157:H7  | SS TX 313-1        | Bovine | USA     | III                      |                          | 1, 2                   |
| USMARC       | <i>Escherichia</i> | <i>coli</i> | O157:H7  | SS TX 426-1        | Bovine | USA     | III                      |                          | 1, 2                   |
| USMARC       | <i>Escherichia</i> | <i>coli</i> | O157:H7  | SS TX 754-1        | Bovine | USA     | III                      |                          | 1, 2                   |
| USMARC       | <i>Escherichia</i> | <i>coli</i> | O157:H7  | SS TX 781-1        | Bovine | USA     | III                      |                          | 1, 2                   |
| USMARC       | <i>Escherichia</i> | <i>coli</i> | O157:H7  | TX 265-1           | Bovine | USA     | III                      |                          | 1, 2                   |
| USMARC       | <i>Escherichia</i> | <i>coli</i> | O157:H7  | TX 291-1           | Bovine | USA     | III                      |                          | 1, 2                   |
| USMARC       | <i>Escherichia</i> | <i>coli</i> | O157:H7  | TX 349-1           | Bovine | USA     | III                      |                          | 1, 2                   |
| USMARC       | <i>Escherichia</i> | <i>coli</i> | O157:H7  | TX 376-2           | Bovine | USA     | III                      |                          | 1, 2                   |
| USMARC       | <i>Escherichia</i> | <i>coli</i> | O157:H7  | TX 723-1           | Bovine | USA     | III                      |                          | 1, 2                   |
| USMARC       | <i>Escherichia</i> | <i>coli</i> | O157:H7  | TX 864-1           | Bovine | USA     | III                      |                          | 1, 2                   |
| USMARC       | <i>Escherichia</i> | <i>coli</i> | O157:H7  | TX 909-1           | Bovine | USA     | III                      |                          | 1, 2                   |
| USMARC       | <i>Escherichia</i> | <i>coli</i> | O157:H7  | TX 931-2           | Bovine | USA     | III                      |                          | 1, 2                   |
| USMARC       | <i>Escherichia</i> | <i>coli</i> | O157:H7  | WS NE 21-1         | Bovine | USA     | III                      |                          | 1, 2                   |
| USMARC       | <i>Escherichia</i> | <i>coli</i> | O157:H7  | WS NE 274-2        | Bovine | USA     | III                      |                          | 1, 2                   |
| USMARC       | <i>Escherichia</i> | <i>coli</i> | O157:H7  | WS NE 340-1        | Bovine | USA     | III                      |                          | 1, 2                   |
| USMARC       | <i>Escherichia</i> | <i>coli</i> | O157:H7  | WS NE 48-1         | Bovine | USA     | III                      |                          | 1, 2                   |
| USMARC       | <i>Escherichia</i> | <i>coli</i> | O157:H7  | WS TX 886-1        | Bovine | USA     | III                      |                          | 1, 2                   |
| USMARC       | <i>Escherichia</i> | <i>coli</i> | O157:H7  | YB14-1             | Bovine | USA     | III                      |                          | 1, 2                   |
| Mandrell     | <i>Escherichia</i> | <i>coli</i> | O157:H7  | RM1239             | Human  | USA     | III                      |                          | 3                      |
| Acheson - MA | <i>Escherichia</i> | <i>coli</i> | O157:H7  | 2                  | Human  | USA     | III                      |                          | 2                      |
| USMARC       | <i>Escherichia</i> | <i>coli</i> | O157:H7  | 3-5-1              | Bovine | USA     | III                      |                          | 2, 6                   |
| USMARC       | <i>Escherichia</i> | <i>coli</i> | O157:H7  | 105-4-1            | Bovine | USA     | III                      |                          | 2, 6                   |
| USMARC       | <i>Escherichia</i> | <i>coli</i> | O157:H7  | 106-2-2            | Bovine | USA     | III                      |                          | 2, 6                   |
| USMARC       | <i>Escherichia</i> | <i>coli</i> | O157:H7  | 107-1-1            | Bovine | USA     | III                      |                          | 6                      |
| USMARC       | <i>Escherichia</i> | <i>coli</i> | O157:H7  | 107-2-1            | Bovine | USA     | III                      |                          | 2, 6                   |
| USMARC       | <i>Escherichia</i> | <i>coli</i> | O157:H7  | 112-5-1            | Bovine | USA     | III                      |                          | 2, 6                   |
| USMARC       | <i>Escherichia</i> | <i>coli</i> | O157:H7  | 120-4-1            | Bovine | USA     | III                      |                          | 2, 6                   |
| USMARC       | <i>Escherichia</i> | <i>coli</i> | O157:H7  | 2-2-1              | Bovine | USA     | III                      |                          | 2, 6                   |
| USMARC       | <i>Escherichia</i> | <i>coli</i> | O157:H7  | 2-3                | Bovine | USA     | III                      |                          | 2, 6                   |
| USMARC       | <i>Escherichia</i> | <i>coli</i> | O157:H7  | 2-6-2              | Bovine | USA     | III                      |                          | 2, 6                   |
| USMARC       | <i>Escherichia</i> | <i>coli</i> | O157:H7  | 207-8-1            | Bovine | USA     | III                      |                          | 2, 6                   |
| USMARC       | <i>Escherichia</i> | <i>coli</i> | O157:H7  | 209-1-1            | Bovine | USA     | III                      |                          | 2, 6                   |

Supplemental Table 1. Bacterial strains used for sequencing and MALDI-TOF validation

| Collection | Genus              | Species     | Serotype | Strain Designation | Source | Country | Application <sup>a</sup> | Genbank accession number | Reference <sup>b</sup> |
|------------|--------------------|-------------|----------|--------------------|--------|---------|--------------------------|--------------------------|------------------------|
| USMARC     | <i>Escherichia</i> | <i>coli</i> | O157:H7  | 211-2-1            | Bovine | USA     | III                      |                          | 2, 6                   |
| USMARC     | <i>Escherichia</i> | <i>coli</i> | O157:H7  | 214-1-1            | Bovine | USA     | III                      |                          | 2, 6                   |
| USMARC     | <i>Escherichia</i> | <i>coli</i> | O157:H7  | 23-1               | Bovine | USA     | III                      |                          | 2, 6                   |
| USMARC     | <i>Escherichia</i> | <i>coli</i> | O157:H7  | 30-3               | Bovine | USA     | III                      |                          | 2, 6                   |
| USMARC     | <i>Escherichia</i> | <i>coli</i> | O157:H7  | 38-1               | Bovine | USA     | III                      |                          | 2, 6                   |
| USMARC     | <i>Escherichia</i> | <i>coli</i> | O157:H7  | 4-3                | Bovine | USA     | III                      |                          | 2, 6                   |
| USMARC     | <i>Escherichia</i> | <i>coli</i> | O157:H7  | 5-11-1             | Bovine | USA     | III                      |                          | 2, 6                   |
| USMARC     | <i>Escherichia</i> | <i>coli</i> | O157:H7  | Ex1-1              | Bovine | USA     | III                      |                          | 2, 6                   |
| USMARC     | <i>Escherichia</i> | <i>coli</i> | O157:H7  | Gim1-1             | Bovine | USA     | III                      |                          | 2, 6                   |
| USMARC     | <i>Escherichia</i> | <i>coli</i> | O157:H7  | L47-1              | Bovine | USA     | III                      |                          | 2, 6                   |
| CDC        | <i>Escherichia</i> | <i>coli</i> | O157:H7  | F4552              | Human  | USA     | III                      |                          |                        |
| CDC        | <i>Escherichia</i> | <i>coli</i> | O157:H7  | F4586              | Human  | USA     | III                      |                          |                        |
| CDC        | <i>Escherichia</i> | <i>coli</i> | O157:H7  | F5606              | Human  | USA     | III                      |                          |                        |
| CDC        | <i>Escherichia</i> | <i>coli</i> | O157:H7  | F5707              | Human  | USA     | III                      |                          |                        |
| CDC        | <i>Escherichia</i> | <i>coli</i> | O157:H7  | F5733              | Human  | USA     | III                      |                          |                        |
| CDC        | <i>Escherichia</i> | <i>coli</i> | O157:H7  | F6141              | Human  | USA     | III                      |                          |                        |
| CDC        | <i>Escherichia</i> | <i>coli</i> | O157:H7  | F6142              | Human  | USA     | III                      |                          |                        |
| CDC        | <i>Escherichia</i> | <i>coli</i> | O157:H7  | F6569              | Human  | USA     | III                      |                          |                        |
| CDC        | <i>Escherichia</i> | <i>coli</i> | O157:H7  | F6667              | Human  | USA     | III                      |                          |                        |
| CDC        | <i>Escherichia</i> | <i>coli</i> | O157:H7  | F6748              | Human  | USA     | III                      |                          |                        |
| CDC        | <i>Escherichia</i> | <i>coli</i> | O157:H7  | F6749              | Human  | USA     | III                      |                          |                        |
| CDC        | <i>Escherichia</i> | <i>coli</i> | O157:H7  | F6750              | Human  | USA     | III                      |                          |                        |
| CDC        | <i>Escherichia</i> | <i>coli</i> | O157:H7  | F6751              | Human  | USA     | III                      |                          |                        |
| CDC        | <i>Escherichia</i> | <i>coli</i> | O157:H7  | F6851              | Human  | USA     | III                      |                          |                        |
| CDC        | <i>Escherichia</i> | <i>coli</i> | O157:H7  | F6854              | Human  | USA     | III                      |                          |                        |
| CDC        | <i>Escherichia</i> | <i>coli</i> | O157:H7  | F6856              | Human  | USA     | III                      |                          |                        |
| CDC        | <i>Escherichia</i> | <i>coli</i> | O157:H7  | F6857              | Human  | USA     | III                      |                          |                        |
| CDC        | <i>Escherichia</i> | <i>coli</i> | O157:H7  | F6858              | Human  | USA     | III                      |                          |                        |
| CDC        | <i>Escherichia</i> | <i>coli</i> | O157:H7  | F6859              | Human  | USA     | III                      |                          |                        |
| CDC        | <i>Escherichia</i> | <i>coli</i> | O157:H7  | F6861              | Human  | USA     | III                      |                          |                        |
| CDC        | <i>Escherichia</i> | <i>coli</i> | O157:H7  | F6862              | Human  | USA     | III                      |                          |                        |
| CDC        | <i>Escherichia</i> | <i>coli</i> | O157:H7  | F6862              | Human  | USA     | III                      |                          |                        |
| CDC        | <i>Escherichia</i> | <i>coli</i> | O157:H7  | F6883              | Human  | USA     | III                      |                          |                        |
| CDC        | <i>Escherichia</i> | <i>coli</i> | O157:H7  | F6884              | Human  | USA     | III                      |                          |                        |
| CDC        | <i>Escherichia</i> | <i>coli</i> | O157:H7  | F6891              | Human  | USA     | III                      |                          |                        |
| CDC        | <i>Escherichia</i> | <i>coli</i> | O157:H7  | F6892              | Human  | USA     | III                      |                          |                        |
| CDC        | <i>Escherichia</i> | <i>coli</i> | O157:H7  | F6893              | Human  | USA     | III                      |                          |                        |
| CDC        | <i>Escherichia</i> | <i>coli</i> | O157:H7  | F6913              | Human  | USA     | III                      |                          |                        |
| CDC        | <i>Escherichia</i> | <i>coli</i> | O157:H7  | F6942              | Human  | USA     | III                      |                          |                        |
| CDC        | <i>Escherichia</i> | <i>coli</i> | O157:H7  | F6953              | Human  | USA     | III                      |                          |                        |
| CDC        | <i>Escherichia</i> | <i>coli</i> | O157:H7  | F7345              | Human  | USA     | III                      |                          |                        |
| CDC        | <i>Escherichia</i> | <i>coli</i> | O157:H7  | F7349              | Human  | USA     | III                      |                          |                        |
| CDC        | <i>Escherichia</i> | <i>coli</i> | O157:H7  | F7350              | Human  | USA     | III                      |                          |                        |

Supplemental Table 1. Bacterial strains used for sequencing and MALDI-TOF validation

| Collection | Genus              | Species     | Serotype | Strain Designation | Source | Country | Application <sup>a</sup> | Genbank accession number | Reference <sup>b</sup> |
|------------|--------------------|-------------|----------|--------------------|--------|---------|--------------------------|--------------------------|------------------------|
| CDC        | <i>Escherichia</i> | <i>coli</i> | O157:H7  | F7351              | Human  | USA     | III                      |                          |                        |
| CDC        | <i>Escherichia</i> | <i>coli</i> | O157:H7  | F7353              | Human  | USA     | III                      |                          |                        |
| CDC        | <i>Escherichia</i> | <i>coli</i> | O157:H7  | F7382              | Human  | USA     | III                      |                          |                        |
| CDC        | <i>Escherichia</i> | <i>coli</i> | O157:H7  | F7383              | Human  | USA     | III                      |                          |                        |
| CDC        | <i>Escherichia</i> | <i>coli</i> | O157:H7  | F7384              | Human  | USA     | III                      |                          |                        |
| CDC        | <i>Escherichia</i> | <i>coli</i> | O157:H7  | F7386              | Human  | USA     | III                      |                          |                        |
| CDC        | <i>Escherichia</i> | <i>coli</i> | O157:H7  | F7388              | Human  | USA     | III                      |                          |                        |
| CDC        | <i>Escherichia</i> | <i>coli</i> | O157:H7  | F7508              | Human  | USA     | III                      |                          |                        |
| CDC        | <i>Escherichia</i> | <i>coli</i> | O157:H7  | F7639              | Human  | USA     | III                      |                          |                        |
| CDC        | <i>Escherichia</i> | <i>coli</i> | O157:H7  | F8092              | Human  | USA     | III                      |                          |                        |
| CDC        | <i>Escherichia</i> | <i>coli</i> | O157:H7  | F8092B             | Human  | USA     | III                      |                          |                        |
| CDC        | <i>Escherichia</i> | <i>coli</i> | O157:H7  | F8289-D            | Human  | USA     | III                      |                          |                        |
| CDC        | <i>Escherichia</i> | <i>coli</i> | O157:H7  | F8774              | Human  | USA     | III                      |                          |                        |
| CDC        | <i>Escherichia</i> | <i>coli</i> | O157:H7  | F8778              | Human  | USA     | III                      |                          |                        |
| CDC        | <i>Escherichia</i> | <i>coli</i> | O157:H7  | F8783              | Human  | USA     | III                      |                          |                        |
| CDC        | <i>Escherichia</i> | <i>coli</i> | O157:H7  | F8784              | Human  | USA     | III                      |                          |                        |
| CDC        | <i>Escherichia</i> | <i>coli</i> | O157:H7  | F8797              | Human  | USA     | III                      |                          |                        |
| CDC        | <i>Escherichia</i> | <i>coli</i> | O157:H7  | F8798              | Human  | USA     | III                      |                          |                        |
| CDC        | <i>Escherichia</i> | <i>coli</i> | O157:H7  | F8799              | Human  | USA     | III                      |                          |                        |
| CDC        | <i>Escherichia</i> | <i>coli</i> | O157:H7  | F8801              | Human  | USA     | III                      |                          |                        |
| CDC        | <i>Escherichia</i> | <i>coli</i> | O157:H7  | F8802              | Human  | USA     | III                      |                          |                        |
| CDC        | <i>Escherichia</i> | <i>coli</i> | O157:H7  | F8803              | Human  | USA     | III                      |                          |                        |
| CDC        | <i>Escherichia</i> | <i>coli</i> | O157:H7  | F8952              | Human  | USA     | III                      |                          |                        |
| CDC        | <i>Escherichia</i> | <i>coli</i> | O157:H7  | F9019              | Human  | USA     | III                      |                          |                        |
| CDC        | <i>Escherichia</i> | <i>coli</i> | O157:H7  | G5285              | Human  | USA     | III                      |                          |                        |
| CDC        | <i>Escherichia</i> | <i>coli</i> | O157:H7  | G5295              | Human  | USA     | III                      |                          |                        |
| CDC        | <i>Escherichia</i> | <i>coli</i> | O157:H7  | G5297              | Human  | USA     | III                      |                          |                        |
| CDC        | <i>Escherichia</i> | <i>coli</i> | O157:H7  | G5303              | Human  | USA     | III                      |                          |                        |
| CDC        | <i>Escherichia</i> | <i>coli</i> | O157:H7  | G5307              | Human  | USA     | III                      |                          |                        |
| CDC        | <i>Escherichia</i> | <i>coli</i> | O157:H7  | G5321              | Human  | USA     | III                      |                          |                        |
| CDC        | <i>Escherichia</i> | <i>coli</i> | O157:H7  | G5425              | Human  | USA     | III                      |                          |                        |
| CDC        | <i>Escherichia</i> | <i>coli</i> | O157:H7  | G6063              | Human  | USA     | III                      |                          |                        |
| CDC        | <i>Escherichia</i> | <i>coli</i> | O157:H7  | G7560              | Human  | USA     | III                      |                          |                        |
| CDC        | <i>Escherichia</i> | <i>coli</i> | O157:H7  | G7602              | Human  | USA     | III                      |                          |                        |
| CDC        | <i>Escherichia</i> | <i>coli</i> | O157:H7  | H0672              | Human  | USA     | III                      |                          |                        |
| CDC        | <i>Escherichia</i> | <i>coli</i> | O157:H7  | H0706              | Human  | USA     | III                      |                          |                        |
| CDC        | <i>Escherichia</i> | <i>coli</i> | O157:H7  | H1949              | Human  | USA     | III                      |                          |                        |
| CDC        | <i>Escherichia</i> | <i>coli</i> | O157:H7  | H2014              | Human  | USA     | III                      |                          |                        |
| CDC        | <i>Escherichia</i> | <i>coli</i> | O157:H7  | H2495              | Human  | USA     | III                      |                          |                        |
| CDC        | <i>Escherichia</i> | <i>coli</i> | O157:H7  | H2498              | Human  | USA     | III                      |                          |                        |
| CDC        | <i>Escherichia</i> | <i>coli</i> | O157:H7  | H6039              | Human  | USA     | III                      |                          |                        |
| CDC        | <i>Escherichia</i> | <i>coli</i> | O157:H7  | H6436              | Human  | USA     | III                      |                          |                        |

Supplemental Table 1. Bacterial strains used for sequencing and MALDI-TOF validation

| Collection | Genus              | Species     | Serotype | Strain Designation | Source | Country | Application <sup>a</sup> | Genbank accession number | Reference <sup>b</sup> |
|------------|--------------------|-------------|----------|--------------------|--------|---------|--------------------------|--------------------------|------------------------|
| CDC        | <i>Escherichia</i> | <i>coli</i> | O157:H7  | H6437              | Human  | USA     | III                      |                          |                        |
| CDC        | <i>Escherichia</i> | <i>coli</i> | O157:H7  | H6437              | Human  | USA     | III                      |                          |                        |
| CDC        | <i>Escherichia</i> | <i>coli</i> | O157:H7  | G5244              | Human  | USA     | III                      |                          |                        |
| RMID       | <i>Escherichia</i> | <i>coli</i> | O157:H7  | Sakai              | Human  | USA     | III                      |                          | 2, 7                   |
| IDPHD      | <i>Escherichia</i> | <i>coli</i> | O157:H7  | 31277              | Human  | USA     | III                      |                          | 2                      |
| USMARC     | <i>Escherichia</i> | <i>coli</i> | O157:H7  | 05-115             | Bovine | USA     | III                      |                          | 2, 8                   |
| USMARC     | <i>Escherichia</i> | <i>coli</i> | O157:H7  | 05-955             | Bovine | USA     | III                      |                          | 2, 8                   |
| USMARC     | <i>Escherichia</i> | <i>coli</i> | O157:H7  | 12B5-1             | Bovine | USA     | III                      |                          | 2, 8                   |
| USMARC     | <i>Escherichia</i> | <i>coli</i> | O157:H7  | 13B3-1             | Bovine | USA     | III                      |                          | 2, 8                   |
| USMARC     | <i>Escherichia</i> | <i>coli</i> | O157:H7  | 17B6-2             | Bovine | USA     | III                      |                          | 2, 8                   |
| USMARC     | <i>Escherichia</i> | <i>coli</i> | O157:H7  | 19B18-1            | Bovine | USA     | III                      |                          | 2, 8                   |
| USMARC     | <i>Escherichia</i> | <i>coli</i> | O157:H7  | 1B8-1              | Bovine | USA     | III                      |                          | 2, 8                   |
| USMARC     | <i>Escherichia</i> | <i>coli</i> | O157:H7  | B11-3              | Bovine | USA     | III                      |                          | 2, 8                   |
| USMARC     | <i>Escherichia</i> | <i>coli</i> | O157:H7  | BB24-1             | Bovine | USA     | III                      |                          | 2, 8                   |
| USMARC     | <i>Escherichia</i> | <i>coli</i> | O157:H7  | BB27-1             | Bovine | USA     | III                      |                          | 2, 8                   |
| USMARC     | <i>Escherichia</i> | <i>coli</i> | O157:H7  | FB12-2             | Bovine | USA     | III                      |                          | 2, 8                   |
| USMARC     | <i>Escherichia</i> | <i>coli</i> | O157:H7  | HB20-3             | Bovine | USA     | III                      |                          | 2, 8                   |
| USMARC     | <i>Escherichia</i> | <i>coli</i> | O157:H7  | MB32-1             | Bovine | USA     | III                      |                          | 2, 8                   |
| USMARC     | <i>Escherichia</i> | <i>coli</i> | O157:H7  | MB40-1             | Bovine | USA     | III                      |                          | 2, 8                   |
| USMARC     | <i>Escherichia</i> | <i>coli</i> | O157:H7  | MB41-1             | Bovine | USA     | III                      |                          | 2, 8                   |
| USMARC     | <i>Escherichia</i> | <i>coli</i> | O157:H7  | MB9-1              | Bovine | USA     | III                      |                          | 2, 8                   |
| USMARC     | <i>Escherichia</i> | <i>coli</i> | O157:H7  | N2B24-1            | Bovine | USA     | III                      |                          | 2, 8                   |
| USMARC     | <i>Escherichia</i> | <i>coli</i> | O157:H7  | N2B53-1            | Bovine | USA     | III                      |                          | 2, 8                   |
| USMARC     | <i>Escherichia</i> | <i>coli</i> | O157:H7  | N5D2-1             | Bovine | USA     | III                      |                          | 2, 8                   |
| USMARC     | <i>Escherichia</i> | <i>coli</i> | O157:H7  | N8B7-2             | Bovine | USA     | III                      |                          | 2, 8                   |
| USMARC     | <i>Escherichia</i> | <i>coli</i> | O157:H7  | SF18 28-1          | Bovine | USA     | III                      |                          | 2, 8                   |
| USMARC     | <i>Escherichia</i> | <i>coli</i> | O157:H7  | SF26 94-1          | Bovine | USA     | III                      |                          | 2, 8                   |
| USMARC     | <i>Escherichia</i> | <i>coli</i> | O157:H7  | TB19-1             | Bovine | USA     | III                      |                          | 2, 8                   |
| USMARC     | <i>Escherichia</i> | <i>coli</i> | O157:H7  | TB21-1             | Bovine | USA     | III                      |                          | 2, 8                   |
| DECA       | <i>Escherichia</i> | <i>coli</i> | O157:H7  | 3A                 | Human  | USA     | III                      |                          | 2                      |
| DECA       | <i>Escherichia</i> | <i>coli</i> | O157:H7  | 3C                 | Human  | USA     | III                      |                          | 2                      |
| DECA       | <i>Escherichia</i> | <i>coli</i> | O157:H7  | 3D                 | Human  | USA     | III                      |                          | 2                      |
| DECA       | <i>Escherichia</i> | <i>coli</i> | O157:H7  | 3E                 | Human  | USA     | III                      |                          | 2                      |
| DECA       | <i>Escherichia</i> | <i>coli</i> | O157:H7  | 4B                 | Human  | USA     | III                      |                          | 2                      |
| DECA       | <i>Escherichia</i> | <i>coli</i> | O157:H7  | 4E                 | Human  | USA     | III                      |                          | 2                      |
| EHEC 1-4   | <i>Escherichia</i> | <i>coli</i> | O157:H7  | TW00116            | Human  | USA     | III                      |                          | 2, 10                  |
| EHEC 1-5   | <i>Escherichia</i> | <i>coli</i> | O157:H7  | TW00975            | Human  | USA     | III                      |                          | 2, 10                  |
| EHEC 1-7   | <i>Escherichia</i> | <i>coli</i> | O157:H7  | TW02883            | Human  | USA     | III                      |                          | 2, 10                  |
| EHEC 1-2   | <i>Escherichia</i> | <i>coli</i> | O157:H7  | TW04863            | Human  | USA     | III                      |                          | 2, 10                  |
| EHEC 1-8   | <i>Escherichia</i> | <i>coli</i> | O157:H7  | TW05356            | Human  | USA     | III                      |                          | 2, 10                  |
| EHEC 1-6   | <i>Escherichia</i> | <i>coli</i> | O157:H7  | TW06555            | Human  | USA     | III                      |                          | 2, 10                  |
| EHEC 1-3   | <i>Escherichia</i> | <i>coli</i> | O157:H7  | TW07587            | Human  | USA     | III                      |                          | 2, 10                  |
| IDPHD      | <i>Escherichia</i> | <i>coli</i> | O128:NM  | 12698              | Human  | USA     | III                      |                          |                        |

Supplemental Table 1. Bacterial strains used for sequencing and MALDI-TOF validation

| Collection       | Genus              | Species     | Serotype     | Strain Designation | Source | Country   | Application <sup>a</sup> | Genbank accession number | Reference <sup>b</sup> |
|------------------|--------------------|-------------|--------------|--------------------|--------|-----------|--------------------------|--------------------------|------------------------|
| IDPHD            | <i>Escherichia</i> | <i>coli</i> | O165:NM      | 12820              | Human  | USA       | III                      |                          |                        |
| IDPHD            | <i>Escherichia</i> | <i>coli</i> | O135:H15     | 14339              | Human  | USA       | III                      |                          |                        |
| CDC - Test Panel | <i>Escherichia</i> | <i>coli</i> | O157:H16     | CDC 20             | Human  | USA       | III                      |                          |                        |
| CDC - Test Panel | <i>Escherichia</i> | <i>coli</i> | O157:H45     | CDC-2              | Human  | USA       | III                      |                          |                        |
| CDC - Test Panel | <i>Escherichia</i> | <i>coli</i> | O157:H12     | CDC17A             | Human  | USA       | III                      |                          |                        |
| CDC - Test Panel | <i>Escherichia</i> | <i>coli</i> | O27:H7       | CDC-15             | Human  | USA       | III                      |                          |                        |
| DECA             | <i>Escherichia</i> | <i>coli</i> | O55:H6       | DECA 1A            | Human  | USA       | III                      |                          |                        |
| DECA             | <i>Escherichia</i> | <i>coli</i> | O55:H6       | DECA 1B            | Human  | D. Guiana | III                      |                          |                        |
| EHEC 1           | <i>Escherichia</i> | <i>coli</i> | O55:H7       | TW05353            | Meat   | N/A       | III                      |                          |                        |
| EHEC 1           | <i>Escherichia</i> | <i>coli</i> | O55:H7       | TW07512            | Human  | USA       | III                      |                          |                        |
| EHEC 1           | <i>Escherichia</i> | <i>coli</i> | O55:H7       | TW00947            | Human  | Sri Lanka | III                      |                          |                        |
| EHEC 1           | <i>Escherichia</i> | <i>coli</i> | O55:H7       | TW04062            | Human  | USA       | III                      |                          |                        |
| IDPHD            | <i>Escherichia</i> | <i>coli</i> | O76:H19      | 12974              | Human  | USA       | III                      |                          |                        |
| IDPHD            | <i>Escherichia</i> | <i>coli</i> | O8:H14       | 13627              | Human  | USA       | III                      |                          |                        |
| IDPHD            | <i>Escherichia</i> | <i>coli</i> | O-undet:H34  | 6853               | Human  | USA       | III                      |                          |                        |
| IDPHD            | <i>Escherichia</i> | <i>coli</i> | O'undet:NM   | 9655               | Human  | USA       | III                      |                          |                        |
| IDPHD            | <i>Escherichia</i> | <i>coli</i> | O'undet:NM   | 9823               | Human  | USA       | III                      |                          |                        |
| IDPHD            | <i>Escherichia</i> | <i>coli</i> | O'undet:NM   | 9972               | Human  | USA       | III                      |                          |                        |
| STEC             | <i>Escherichia</i> | <i>coli</i> | O118:H16     | TW14               | N/A    | N/A       | III                      |                          |                        |
| EIEC             | <i>Escherichia</i> | <i>coli</i> | O124:H30     | TW1                | N/A    | N/A       | III                      |                          |                        |
| IDPHD            | <i>Escherichia</i> | <i>coli</i> | O146:H21     | 7606               | Human  | USA       | III                      |                          |                        |
| STEC             | <i>Escherichia</i> | <i>coli</i> | O15:H11      | TW11               | N/A    | N/A       | III                      |                          |                        |
| IDPHD            | <i>Escherichia</i> | <i>coli</i> | O165:NM      | 9773               | Human  | USA       | III                      |                          |                        |
| IDPHD            | <i>Escherichia</i> | <i>coli</i> | O28:H25      | 10596              | Human  | USA       | III                      |                          |                        |
| STEC             | <i>Escherichia</i> | <i>coli</i> | O70:H11      | TW4                | N/A    | N/A       | III                      |                          |                        |
| CDC - O STD's    | <i>Escherichia</i> | <i>coli</i> | O1:K1:H7     | U 5-41             | N/A    | USA       | III                      |                          |                        |
| CDC - O STD's    | <i>Escherichia</i> | <i>coli</i> | O2:K1:H4     | U 9-41             | N/A    | USA       | III                      |                          |                        |
| CDC - O STD's    | <i>Escherichia</i> | <i>coli</i> | O3:K2a,2b:H2 | U 14-41            | N/A    | USA       | III                      |                          |                        |
| CDC - O STD's    | <i>Escherichia</i> | <i>coli</i> | O4:K3:H5     | U 4-41             | N/A    | USA       | III                      |                          |                        |
| CDC - O STD's    | <i>Escherichia</i> | <i>coli</i> | O5:K4:H4     | U 1-41             | N/A    | USA       | III                      |                          |                        |
| CDC - O STD's    | <i>Escherichia</i> | <i>coli</i> | O6:K2a,2c:H1 | Bi 7458-41         | N/A    | USA       | III                      |                          |                        |
| CDC - O STD's    | <i>Escherichia</i> | <i>coli</i> | O7:K1:HNM    | Bi 7509-41         | N/A    | USA       | III                      |                          |                        |
| CDC - O STD's    | <i>Escherichia</i> | <i>coli</i> | O8:K8:H4     | G 3404-41          | N/A    | USA       | III                      |                          |                        |
| CDC - O STD's    | <i>Escherichia</i> | <i>coli</i> | O9:K9:H12    | Bi 316-42          | N/A    | USA       | III                      |                          |                        |
| CDC - O STD's    | <i>Escherichia</i> | <i>coli</i> | O10:K5:H4    | Bi 8337-41         | N/A    | USA       | III                      |                          |                        |
| CDC - O STD's    | <i>Escherichia</i> | <i>coli</i> | O11:K10:H10  | Bi 623-42          | N/A    | USA       | III                      |                          |                        |
| CDC - O STD's    | <i>Escherichia</i> | <i>coli</i> | O12:K5:HNM   | Bi 626-42          | N/A    | USA       | III                      |                          |                        |
| CDC - O STD's    | <i>Escherichia</i> | <i>coli</i> | O13:K11:H11  | Su 4321-41         | N/A    | USA       | III                      |                          |                        |
| CDC - O STD's    | <i>Escherichia</i> | <i>coli</i> | O14:K7:HNM   | Su 4411-41         | N/A    | USA       | III                      |                          |                        |
| CDC - O STD's    | <i>Escherichia</i> | <i>coli</i> | O15:K14:H4   | F 7902-41          | N/A    | USA       | III                      |                          |                        |
| CDC - O STD's    | <i>Escherichia</i> | <i>coli</i> | O16:K1:HNM   | F 11119-41         | N/A    | USA       | III                      |                          |                        |
| CDC - O STD's    | <i>Escherichia</i> | <i>coli</i> | O17:K16:H18  | K 12a              | N/A    | USA       | III                      |                          |                        |
| CDC - O STD's    | <i>Escherichia</i> | <i>coli</i> | O18:K(b):H14 | F 10018-41         | N/A    | USA       | III                      |                          |                        |

Supplemental Table 1. Bacterial strains used for sequencing and MALDI-TOF validation

| Collection    | Genus              | Species     | Serotype       | Strain Designation | Source | Country | Application <sup>a</sup> | Genbank accession number | Reference <sup>b</sup> |
|---------------|--------------------|-------------|----------------|--------------------|--------|---------|--------------------------|--------------------------|------------------------|
| CDC - O STD's | <i>Escherichia</i> | <i>coli</i> | O19a           | F 8858-41          | N/A    | USA     | III                      |                          |                        |
| CDC - O STD's | <i>Escherichia</i> | <i>coli</i> | O19ab:H7       | F 8188-41          | N/A    | USA     | III                      |                          |                        |
| CDC - O STD's | <i>Escherichia</i> | <i>coli</i> | O20:K17:HNM    | P 7a               | N/A    | USA     | III                      |                          |                        |
| CDC - O STD's | <i>Escherichia</i> | <i>coli</i> | O21:K20:HNM    | E 19a              | N/A    | USA     | III                      |                          |                        |
| CDC - O STD's | <i>Escherichia</i> | <i>coli</i> | O22:K13:H1     | E 14a              | N/A    | USA     | III                      |                          |                        |
| CDC - O STD's | <i>Escherichia</i> | <i>coli</i> | O23:K18:H15    | E 39a              | N/A    | USA     | III                      |                          |                        |
| CDC - O STD's | <i>Escherichia</i> | <i>coli</i> | O24:KAP(+):HNM | E 41a              | N/A    | USA     | III                      |                          |                        |
| CDC - O STD's | <i>Escherichia</i> | <i>coli</i> | O25:K19:H12    | E 47a              | N/A    | USA     | III                      |                          |                        |
| CDC - O STD's | <i>Escherichia</i> | <i>coli</i> | O26:K(b):H11   | H 311b             | N/A    | USA     | III                      |                          |                        |
| CDC - O STD's | <i>Escherichia</i> | <i>coli</i> | O27:K-:HNM     | F 9884-41          | N/A    | USA     | III                      |                          |                        |
| CDC - O STD's | <i>Escherichia</i> | <i>coli</i> | O28:K-:HNM     | K 1a               | N/A    | USA     | III                      |                          |                        |
| CDC - O STD's | <i>Escherichia</i> | <i>coli</i> | O29:K-:H10     | Su 4338-41         | N/A    | USA     | III                      |                          |                        |
| CDC - O STD's | <i>Escherichia</i> | <i>coli</i> | O30:K-:HNM     | P 2a               | N/A    | USA     | III                      |                          |                        |
| CDC - O STD's | <i>Escherichia</i> | <i>coli</i> | O32:K-:H19     | P 6a               | N/A    | USA     | III                      |                          |                        |
| CDC - O STD's | <i>Escherichia</i> | <i>coli</i> | O33:K-:HNM     | E 40               | N/A    | USA     | III                      |                          |                        |
| CDC - O STD's | <i>Escherichia</i> | <i>coli</i> | O34:K-:H10     | H 304              | N/A    | USA     | III                      |                          |                        |
| CDC - O STD's | <i>Escherichia</i> | <i>coli</i> | O35:K-:H10     | E 77a              | N/A    | USA     | III                      |                          |                        |
| CDC - O STD's | <i>Escherichia</i> | <i>coli</i> | O36:K-:H9      | H 502a             | N/A    | USA     | III                      |                          |                        |
| CDC - O STD's | <i>Escherichia</i> | <i>coli</i> | O37:K-:H10     | H 510c             | N/A    | USA     | III                      |                          |                        |
| CDC - O STD's | <i>Escherichia</i> | <i>coli</i> | O38:H26        | F 11621-41         | N/A    | USA     | III                      |                          |                        |
| CDC - O STD's | <i>Escherichia</i> | <i>coli</i> | O39:HNM        | H 7                | N/A    | USA     | III                      |                          |                        |
| CDC - O STD's | <i>Escherichia</i> | <i>coli</i> | O40:K-:H4      | H 316              | N/A    | USA     | III                      |                          |                        |
| CDC - O STD's | <i>Escherichia</i> | <i>coli</i> | O41:K-:H40     | H 710c             | N/A    | USA     | III                      |                          |                        |
| CDC - O STD's | <i>Escherichia</i> | <i>coli</i> | O42:K-:H37     | P 11a              | N/A    | USA     | III                      |                          |                        |
| CDC - O STD's | <i>Escherichia</i> | <i>coli</i> | O43:K-:H2      | Bi 7455-41         | N/A    | USA     | III                      |                          |                        |
| CDC - O STD's | <i>Escherichia</i> | <i>coli</i> | O44:K74:H18    | H 702c             | N/A    | USA     | III                      |                          |                        |
| CDC - O STD's | <i>Escherichia</i> | <i>coli</i> | O45:K1:H10     | H 61               | N/A    | USA     | III                      |                          |                        |
| CDC - O STD's | <i>Escherichia</i> | <i>coli</i> | O46:K-:H16     | P 1c               | N/A    | USA     | III                      |                          |                        |
| CDC - O STD's | <i>Escherichia</i> | <i>coli</i> | O48:K-:HNM     | U 8-41             | N/A    | USA     | III                      |                          |                        |
| CDC - O STD's | <i>Escherichia</i> | <i>coli</i> | O49:KAP(+):H12 | U 12-41            | N/A    | USA     | III                      |                          |                        |
| CDC - O STD's | <i>Escherichia</i> | <i>coli</i> | O50:K-:HNM(4)  | U 18-41            | N/A    | USA     | III                      |                          |                        |
| CDC - O STD's | <i>Escherichia</i> | <i>coli</i> | O51:K-:H24     | U 19-41            | N/A    | USA     | III                      |                          |                        |
| CDC - O STD's | <i>Escherichia</i> | <i>coli</i> | O52:K-:H10     | U 20-41            | N/A    | USA     | III                      |                          |                        |
| CDC - O STD's | <i>Escherichia</i> | <i>coli</i> | O53:K-:H3      | Bi 7327-41         | N/A    | USA     | III                      |                          |                        |
| CDC - O STD's | <i>Escherichia</i> | <i>coli</i> | O54:K-:H2      | Bi 3972-41         | N/A    | USA     | III                      |                          |                        |
| CDC - O STD's | <i>Escherichia</i> | <i>coli</i> | O55:K(b):HNM   | Su 3912-41         | N/A    | USA     | III                      |                          |                        |
| CDC - O STD's | <i>Escherichia</i> | <i>coli</i> | O56:KAP(+):HNM | Su 3684-41         | N/A    | USA     | III                      |                          |                        |
| CDC - O STD's | <i>Escherichia</i> | <i>coli</i> | O57:K-:HNM     | F 8198-41          | N/A    | USA     | III                      |                          |                        |
| CDC - O STD's | <i>Escherichia</i> | <i>coli</i> | O58:K-:HNM(27) | F 8962-41          | N/A    | USA     | III                      |                          |                        |
| CDC - O STD's | <i>Escherichia</i> | <i>coli</i> | O59:K-:H19     | F 9095-41          | N/A    | USA     | III                      |                          |                        |
| CDC - O STD's | <i>Escherichia</i> | <i>coli</i> | O60:K-:HNM(33) | F 10167a-41        | N/A    | USA     | III                      |                          |                        |
| CDC - O STD's | <i>Escherichia</i> | <i>coli</i> | O61:K-:H19     | F 10167b-41        | N/A    | USA     | III                      |                          |                        |
| CDC - O STD's | <i>Escherichia</i> | <i>coli</i> | O62:K-:H30     | F 10524-41         | N/A    | USA     | III                      |                          |                        |

Supplemental Table 1. Bacterial strains used for sequencing and MALDI-TOF validation

| Collection    | Genus              | Species     | Serotype           | Strain Designation | Source | Country | Application <sup>a</sup> | Genbank accession number | Reference <sup>b</sup> |
|---------------|--------------------|-------------|--------------------|--------------------|--------|---------|--------------------------|--------------------------|------------------------|
| CDC - O STD's | <i>Escherichia</i> | <i>coli</i> | O63:K-:HNM         | F 10598-41         | N/A    | USA     | III                      |                          |                        |
| CDC - O STD's | <i>Escherichia</i> | <i>coli</i> | O64:K-:HNM         | K 6b               | N/A    | USA     | III                      |                          |                        |
| CDC - O STD's | <i>Escherichia</i> | <i>coli</i> | O65:K-:HNM         | K 11a              | N/A    | USA     | III                      |                          |                        |
| CDC - O STD's | <i>Escherichia</i> | <i>coli</i> | O66:K-:H25         | P 6a               | N/A    | USA     | III                      |                          |                        |
| CDC - O STD's | <i>Escherichia</i> | <i>coli</i> | O68:K-:H4          | P 7d               | N/A    | USA     | III                      |                          |                        |
| CDC - O STD's | <i>Escherichia</i> | <i>coli</i> | O69:K-:H38         | P 9b               | N/A    | USA     | III                      |                          |                        |
| CDC - O STD's | <i>Escherichia</i> | <i>coli</i> | O70:K-:H38         | P 9c               | N/A    | USA     | III                      |                          |                        |
| CDC - O STD's | <i>Escherichia</i> | <i>coli</i> | O71:K-:H12         | P 10a              | N/A    | USA     | III                      |                          |                        |
| CDC - O STD's | <i>Escherichia</i> | <i>coli</i> | O73:K-:H31         | P 12a              | N/A    | USA     | III                      |                          |                        |
| CDC - O STD's | <i>Escherichia</i> | <i>coli</i> | O74:K-:H39         | E 3a               | N/A    | USA     | III                      |                          |                        |
| CDC - O STD's | <i>Escherichia</i> | <i>coli</i> | O75:K95:H5         | E 3b               | N/A    | USA     | III                      |                          |                        |
| CDC - O STD's | <i>Escherichia</i> | <i>coli</i> | O76:K-:H8          | E 5d               | N/A    | USA     | III                      |                          |                        |
| CDC - O STD's | <i>Escherichia</i> | <i>coli</i> | O77:K96:HNM        | E 10               | N/A    | USA     | III                      |                          |                        |
| CDC - O STD's | <i>Escherichia</i> | <i>coli</i> | O78:K(b):HNM       | E 38               | N/A    | USA     | III                      |                          |                        |
| CDC - O STD's | <i>Escherichia</i> | <i>coli</i> | O79:K-:H40         | E 49               | N/A    | USA     | III                      |                          |                        |
| CDC - O STD's | <i>Escherichia</i> | <i>coli</i> | O80:K-:H26         | E 71               | N/A    | USA     | III                      |                          |                        |
| CDC - O STD's | <i>Escherichia</i> | <i>coli</i> | O81:K97:HNM        | H 5                | N/A    | USA     | III                      |                          |                        |
| CDC - O STD's | <i>Escherichia</i> | <i>coli</i> | O82:K-:HNM         | H 14               | N/A    | USA     | III                      |                          |                        |
| CDC - O STD's | <i>Escherichia</i> | <i>coli</i> | O83:K24:H31        | H 17a              | N/A    | USA     | III                      |                          |                        |
| CDC - O STD's | <i>Escherichia</i> | <i>coli</i> | O84:K-:H21         | H 19               | N/A    | USA     | III                      |                          |                        |
| CDC - O STD's | <i>Escherichia</i> | <i>coli</i> | O85:K-:H1          | H 23               | N/A    | USA     | III                      |                          |                        |
| CDC - O STD's | <i>Escherichia</i> | <i>coli</i> | O86:K-:H25         | H 35               | N/A    | USA     | III                      |                          |                        |
| CDC - O STD's | <i>Escherichia</i> | <i>coli</i> | O87:K-:H12         | H 40               | N/A    | USA     | III                      |                          |                        |
| CDC - O STD's | <i>Escherichia</i> | <i>coli</i> | O88:K-:H25         | H 53               | N/A    | USA     | III                      |                          |                        |
| CDC - O STD's | <i>Escherichia</i> | <i>coli</i> | O89:K-:H16         | H 68               | N/A    | USA     | III                      |                          |                        |
| CDC - O STD's | <i>Escherichia</i> | <i>coli</i> | O90:K-:HNM         | H 77               | N/A    | USA     | III                      |                          |                        |
| CDC - O STD's | <i>Escherichia</i> | <i>coli</i> | O91:K-:HNM         | H 307b             | N/A    | USA     | III                      |                          |                        |
| CDC - O STD's | <i>Escherichia</i> | <i>coli</i> | O92:K-:H33         | 1930-58            | N/A    | USA     | III                      |                          |                        |
| CDC - O STD's | <i>Escherichia</i> | <i>coli</i> | O95:KAP(+):HNM(33) | H 311a             | N/A    | USA     | III                      |                          |                        |
| CDC - O STD's | <i>Escherichia</i> | <i>coli</i> | O96:K-:H19         | H 319              | N/A    | USA     | III                      |                          |                        |
| CDC - O STD's | <i>Escherichia</i> | <i>coli</i> | O97:K-:HNM         | H 320a             | N/A    | USA     | III                      |                          |                        |
| CDC - O STD's | <i>Escherichia</i> | <i>coli</i> | O98:K-:H8          | H 510d             | N/A    | USA     | III                      |                          |                        |
| CDC - O STD's | <i>Escherichia</i> | <i>coli</i> | O99:K-:H33         | H 504c             | N/A    | USA     | III                      |                          |                        |
| CDC - O STD's | <i>Escherichia</i> | <i>coli</i> | O100:K-:H2         | H 509a             | N/A    | USA     | III                      |                          |                        |
| CDC - O STD's | <i>Escherichia</i> | <i>coli</i> | O101:K-:H33        | H 501a             | N/A    | USA     | III                      |                          |                        |
| CDC - O STD's | <i>Escherichia</i> | <i>coli</i> | O102:K-:H8         | H 511              | N/A    | USA     | III                      |                          |                        |
| CDC - O STD's | <i>Escherichia</i> | <i>coli</i> | O103:KAP(+):H8     | H 515b             | N/A    | USA     | III                      |                          |                        |
| CDC - O STD's | <i>Escherichia</i> | <i>coli</i> | O104:K-:H12        | H 519              | N/A    | USA     | III                      |                          |                        |
| CDC - O STD's | <i>Escherichia</i> | <i>coli</i> | O105:K-:H8         | H 520b             | N/A    | USA     | III                      |                          |                        |
| CDC - O STD's | <i>Escherichia</i> | <i>coli</i> | O106:K-:H33        | H 521a             | N/A    | USA     | III                      |                          |                        |
| CDC - O STD's | <i>Escherichia</i> | <i>coli</i> | O107:K98:H27       | H 705              | N/A    | USA     | III                      |                          |                        |
| CDC - O STD's | <i>Escherichia</i> | <i>coli</i> | O108:K-:H10        | H 708b             | N/A    | USA     | III                      |                          |                        |
| CDC - O STD's | <i>Escherichia</i> | <i>coli</i> | O109:K-:H19        | H 709c             | N/A    | USA     | III                      |                          |                        |

**Supplemental Table 1. Bacterial strains used for sequencing and MALDI-TOF validation**

| Collection    | Genus              | Species     | Serotype          | Strain Designation | Source | Country | Application <sup>a</sup> | Genbank accession number | Reference <sup>b</sup> |
|---------------|--------------------|-------------|-------------------|--------------------|--------|---------|--------------------------|--------------------------|------------------------|
| CDC - O STD's | <i>Escherichia</i> | <i>coli</i> | O110:K:H39        | H 711c             | N/A    | USA     | III                      |                          |                        |
| CDC - O STD's | <i>Escherichia</i> | <i>coli</i> | O111:K(b):HNM     | Stoke W            | N/A    | USA     | III                      |                          |                        |
| CDC - O STD's | <i>Escherichia</i> | <i>coli</i> | O112:K(b):H18     | 1411-50            | N/A    | USA     | III                      |                          |                        |
| CDC - O STD's | <i>Escherichia</i> | <i>coli</i> | O113:K:H21        | 6182-50            | N/A    | USA     | III                      |                          |                        |
| CDC - O STD's | <i>Escherichia</i> | <i>coli</i> | O114:K:H32        | W 26               | N/A    | USA     | III                      |                          |                        |
| CDC - O STD's | <i>Escherichia</i> | <i>coli</i> | O115:K:H18        | W 27               | N/A    | USA     | III                      |                          |                        |
| CDC - O STD's | <i>Escherichia</i> | <i>coli</i> | O116:KAP(+):H10   | W 28               | N/A    | USA     | III                      |                          |                        |
| CDC - O STD's | <i>Escherichia</i> | <i>coli</i> | O117:K98:H4       | W 30               | N/A    | USA     | III                      |                          |                        |
| CDC - O STD's | <i>Escherichia</i> | <i>coli</i> | O118:K:HNM        | W 31               | N/A    | USA     | III                      |                          |                        |
| CDC - O STD's | <i>Escherichia</i> | <i>coli</i> | O119:K(b):H27     | W 34               | N/A    | USA     | III                      |                          |                        |
| CDC - O STD's | <i>Escherichia</i> | <i>coli</i> | O120:KAP(+):H6    | W 35               | N/A    | USA     | III                      |                          |                        |
| CDC - O STD's | <i>Escherichia</i> | <i>coli</i> | O121:K:H10        | W 39               | N/A    | USA     | III                      |                          |                        |
| CDC - O STD's | <i>Escherichia</i> | <i>coli</i> | O123:K:H16        | W 43               | N/A    | USA     | III                      |                          |                        |
| CDC - O STD's | <i>Escherichia</i> | <i>coli</i> | O124:K(b):H32     | 227                | N/A    | USA     | III                      |                          |                        |
| CDC - O STD's | <i>Escherichia</i> | <i>coli</i> | O125:K(b):H19     | Canioni (2745-53)  | N/A    | USA     | III                      |                          |                        |
| CDC - O STD's | <i>Escherichia</i> | <i>coli</i> | O126:K(b):H2      | E 611 (6021-50)    | N/A    | USA     | III                      |                          |                        |
| CDC - O STD's | <i>Escherichia</i> | <i>coli</i> | O127:K(b):HNM     | Holcomb (4932-53)  | N/A    | USA     | III                      |                          |                        |
| CDC - O STD's | <i>Escherichia</i> | <i>coli</i> | O128:K(b):H2      | Cigleris (56-54)   | N/A    | USA     | III                      |                          |                        |
| CDC - O STD's | <i>Escherichia</i> | <i>coli</i> | O129:K:H11        | 178-54 (1986-54)   | N/A    | USA     | III                      |                          |                        |
| CDC - O STD's | <i>Escherichia</i> | <i>coli</i> | O130:K:H9         | 4866-53            | N/A    | USA     | III                      |                          |                        |
| CDC - O STD's | <i>Escherichia</i> | <i>coli</i> | O131:K:H26        | HW 27              | N/A    | USA     | III                      |                          |                        |
| CDC - O STD's | <i>Escherichia</i> | <i>coli</i> | O132:KAP(+):H28   | HW 30              | N/A    | USA     | III                      |                          |                        |
| CDC - O STD's | <i>Escherichia</i> | <i>coli</i> | O133:K:H29        | HW 31              | N/A    | USA     | III                      |                          |                        |
| CDC - O STD's | <i>Escherichia</i> | <i>coli</i> | O134:K:H35        | 4370-53            | N/A    | USA     | III                      |                          |                        |
| CDC - O STD's | <i>Escherichia</i> | <i>coli</i> | O135:K:HNM        | 3278-55            | N/A    | USA     | III                      |                          |                        |
| CDC - O STD's | <i>Escherichia</i> | <i>coli</i> | O136:K(b):HNM     | 1111-55            | N/A    | USA     | III                      |                          |                        |
| CDC - O STD's | <i>Escherichia</i> | <i>coli</i> | O137:K(b):H41     | RVC 1787           | N/A    | USA     | III                      |                          |                        |
| CDC - O STD's | <i>Escherichia</i> | <i>coli</i> | O138:K(b):H14     | 62-57              | N/A    | USA     | III                      |                          |                        |
| CDC - O STD's | <i>Escherichia</i> | <i>coli</i> | O139:K(b):H1      | 63-57              | N/A    | USA     | III                      |                          |                        |
| CDC - O STD's | <i>Escherichia</i> | <i>coli</i> | O140:K:H43        | 149-51             | N/A    | USA     | III                      |                          |                        |
| CDC - O STD's | <i>Escherichia</i> | <i>coli</i> | O141:K88ab(L):H4  | RVC 2907           | N/A    | USA     | III                      |                          |                        |
| CDC - O STD's | <i>Escherichia</i> | <i>coli</i> | O142:K(b):H6      | C 771              | N/A    | USA     | III                      |                          |                        |
| CDC - O STD's | <i>Escherichia</i> | <i>coli</i> | O143:K:HNM        | 4608-58            | N/A    | USA     | III                      |                          |                        |
| CDC - O STD's | <i>Escherichia</i> | <i>coli</i> | O144:K:HNM        | 1624-56            | N/A    | USA     | III                      |                          |                        |
| CDC - O STD's | <i>Escherichia</i> | <i>coli</i> | O145:K:HNM        | E 1385 (3)         | N/A    | USA     | III                      |                          |                        |
| CDC - O STD's | <i>Escherichia</i> | <i>coli</i> | O146:K:H21        | 2950-54            | N/A    | USA     | III                      |                          |                        |
| CDC - O STD's | <i>Escherichia</i> | <i>coli</i> | O147:K88ac(L):H19 | G 1253             | N/A    | USA     | III                      |                          |                        |
| CDC - O STD's | <i>Escherichia</i> | <i>coli</i> | O148:K:H28        | E 519-66           | N/A    | USA     | III                      |                          |                        |
| CDC - O STD's | <i>Escherichia</i> | <i>coli</i> | O149:K(b):H10     | D616 (CS 1483)     | N/A    | USA     | III                      |                          |                        |
| CDC - O STD's | <i>Escherichia</i> | <i>coli</i> | O150:K93:H6       | Ch S               | N/A    | USA     | III                      |                          |                        |
| CDC - O STD's | <i>Escherichia</i> | <i>coli</i> | O151:K:H10        | 880-67             | N/A    | USA     | III                      |                          |                        |
| CDC - O STD's | <i>Escherichia</i> | <i>coli</i> | O152:K:HNM        | 1184-68            | N/A    | USA     | III                      |                          |                        |
| CDC - O STD's | <i>Escherichia</i> | <i>coli</i> | O153:K:H7         | 14097              | N/A    | USA     | III                      |                          |                        |

Supplemental Table 1. Bacterial strains used for sequencing and MALDI-TOF validation

| Collection    | Genus                  | Species               | Serotype          | Strain Designation | Source | Country | Application <sup>a</sup> | Genbank accession number | Reference <sup>b</sup> |
|---------------|------------------------|-----------------------|-------------------|--------------------|--------|---------|--------------------------|--------------------------|------------------------|
| CDC - O STD's | <i>Escherichia</i>     | <i>coli</i>           | O154:K94:H4       | E 1551-68          | N/A    | USA     | III                      |                          |                        |
| CDC - O STD's | <i>Escherichia</i>     | <i>coli</i>           | O155:K-:H9        | E 1529-68          | N/A    | USA     | III                      |                          |                        |
| CDC - O STD's | <i>Escherichia</i>     | <i>coli</i>           | O156:K-:H47       | E 1585-68          | N/A    | USA     | III                      |                          |                        |
| CDC - O STD's | <i>Escherichia</i>     | <i>coli</i>           | O157:K88ac(L):H19 | A 2                | N/A    | USA     | III                      |                          |                        |
| CDC - O STD's | <i>Escherichia</i>     | <i>coli</i>           | O158:K-:H23       | E 1020-72          | N/A    | USA     | III                      |                          |                        |
| CDC - O STD's | <i>Escherichia</i>     | <i>coli</i>           | O159:K-:H20       | E 2476-72          | N/A    | USA     | III                      |                          |                        |
| CDC - O STD's | <i>Escherichia</i>     | <i>coli</i>           | O160:K-:H34       | E 110-69           | N/A    | USA     | III                      |                          |                        |
| CDC - O STD's | <i>Escherichia</i>     | <i>coli</i>           | O161:K-:H54       | E 223-69           | N/A    | USA     | III                      |                          |                        |
| CDC - O STD's | <i>Escherichia</i>     | <i>coli</i>           | O162:K-:H10       | 10B1/1             | N/A    | USA     | III                      |                          |                        |
| CDC - O STD's | <i>Escherichia</i>     | <i>coli</i>           | O163:K-:H19       | SN3B/1             | N/A    | USA     | III                      |                          |                        |
| CDC - O STD's | <i>Escherichia</i>     | <i>coli</i>           | O164:K-:HNM       | 145/46             | N/A    | USA     | III                      |                          |                        |
| CDC - O STD's | <i>Escherichia</i>     | <i>coli</i>           | O165:K-:HNM       | E78634             | N/A    | USA     | III                      |                          |                        |
| CDC - O STD's | <i>Escherichia</i>     | <i>coli</i>           | O166:K-:H4        | 3866-54 (OX8)      | N/A    | USA     | III                      |                          |                        |
| CDC - O STD's | <i>Escherichia</i>     | <i>coli</i>           | O167:K-:H-        | E10702             | N/A    | USA     | III                      |                          |                        |
| CDC - O STD's | <i>Escherichia</i>     | <i>coli</i>           | O168:K-:H-        | 179-54 (OX5)       | N/A    | USA     | III                      |                          |                        |
| CDC - O STD's | <i>Escherichia</i>     | <i>coli</i>           | O169:K-:H8        | 2112-76            | N/A    | USA     | III                      |                          |                        |
| CDC - O STD's | <i>Escherichia</i>     | <i>coli</i>           | O170:K-:H1        | 3872-69 (OX1)      | N/A    | USA     | III                      |                          |                        |
| CDC - O STD's | <i>Escherichia</i>     | <i>coli</i>           | O171              | 244-55 (OX6)       | N/A    | USA     | III                      |                          |                        |
| CDC - O STD's | <i>Escherichia</i>     | <i>coli</i>           | O172              | 85-3288            | N/A    | USA     | III                      |                          |                        |
| CDC - O STD's | <i>Escherichia</i>     | <i>coli</i>           | O173              | L119B-10           | N/A    | USA     | III                      |                          |                        |
| CDC - O STD's | <i>Escherichia</i>     | <i>coli</i>           | O174              | 2531-54            | N/A    | USA     | III                      |                          |                        |
| CDC - O STD's | <i>Escherichia</i>     | <i>coli</i>           | O175              | 2533-54            | N/A    | USA     | III                      |                          |                        |
| CDC - O STD's | <i>Escherichia</i>     | <i>coli</i>           | O176              | E29518/83          | N/A    | USA     | III                      |                          |                        |
| CDC - O STD's | <i>Escherichia</i>     | <i>coli</i>           | O177              | E40874/85          | N/A    | USA     | III                      |                          |                        |
| CDC - O STD's | <i>Escherichia</i>     | <i>coli</i>           | O178              | E54071/88          | N/A    | USA     | III                      |                          |                        |
| CDC - O STD's | <i>Escherichia</i>     | <i>coli</i>           | O179              | E434478            | N/A    | USA     | III                      |                          |                        |
| CDC - O STD's | <i>Escherichia</i>     | <i>coli</i>           | O180              | 86-381             | N/A    | USA     | III                      |                          |                        |
| CDC - O STD's | <i>Escherichia</i>     | <i>coli</i>           | O181              | 92-1250            | N/A    | USA     | III                      |                          |                        |
| JN ATCC       | <i>Acinetobacter</i>   | <i>calcoaceti</i>     |                   | 19606              | N/A    | N/A     | III                      |                          |                        |
| NOBL ATCC     | <i>Actinobacillus</i>  | <i>suis</i>           |                   | 15557              | N/A    | N/A     | III                      |                          |                        |
| JN ATCC       | <i>Aeromonas</i>       | <i>hydrophila</i>     |                   | 7965               | N/A    | N/A     | III                      |                          |                        |
| ATCC          | <i>Alcaligenes</i>     | <i>faecalis</i>       |                   | 8750               | N/A    | N/A     | III                      |                          |                        |
| NOBL ATCC     | <i>Arcanobacterium</i> | <i>pyogenes</i>       |                   | 19411              | Swine  | N/A     | III                      |                          |                        |
| NOBL ATCC     | <i>Bordetella</i>      | <i>bronchiseptica</i> |                   | 10580              | Canine | USA     | III                      |                          |                        |
| ATCC          | <i>Cedecea</i>         | <i>lapagei</i>        |                   | 33432              | Human  | Canada  | III                      |                          |                        |
| JN ATCC       | <i>Citrobacter</i>     | <i>freundii</i>       |                   | 8090               | N/A    | N/A     | III                      |                          |                        |
| CDC           | <i>Citrobacter</i>     | <i>freundii</i>       |                   | CDC-11             | Human  | USA     | III                      |                          |                        |
| Dayna Harhay  | <i>Enterococcus</i>    | <i>faecalis</i>       |                   | 06-582             | N/A    | USA     | III                      |                          |                        |
| ATCC          | <i>Edwardsiella</i>    | <i>tarda</i>          |                   | 15947              | Human  | USA     | III                      |                          |                        |
| ATCC          | <i>Enterobacter</i>    | <i>aerogenes</i>      |                   | 13048              | Human  | USA     | III                      |                          |                        |
| JN ATCC       | <i>Enterobacter</i>    | <i>cloacae</i>        |                   | 23395              | N/A    | N/A     | III                      |                          |                        |
| ATCC          | <i>Enterococcus</i>    | <i>faecalis</i>       |                   | 19433              | N/A    | N/A     | III                      |                          |                        |
| ATCC          | <i>Escherichia</i>     | <i>fergusonii</i>     |                   | 35469              | Human  | USA     | III                      |                          |                        |

Supplemental Table 1. Bacterial strains used for sequencing and MALDI-TOF validation

| Collection | Genus              | Species            | Serotype | Strain Designation | Source  | Country | Application <sup>a</sup> | Genbank accession number | Reference <sup>b</sup> |
|------------|--------------------|--------------------|----------|--------------------|---------|---------|--------------------------|--------------------------|------------------------|
| ATCC       | <i>Escherichia</i> | <i>hermannii</i>   |          | 33650              | Human   | USA     | III                      |                          |                        |
| CDC        | <i>Escherichia</i> | <i>hermannii</i>   |          | CDC-12             | Human   | USA     | III                      |                          |                        |
| ATCC       | <i>Escherichia</i> | <i>vulgaris</i>    |          | 33821              | Human   | USA     | III                      |                          |                        |
| ATCC       | <i>Hafnia</i>      | <i>alvei</i>       |          | 13337              | N/A     | N/A     | III                      |                          |                        |
| ATCC       | <i>Klebsiella</i>  | <i>oxytaca</i>     |          | 8724               | N/A     | N/A     | III                      |                          |                        |
| JN ATCC    | <i>Klebsiella</i>  | <i>pneumoniae</i>  |          | 13883              | N/A     | N/A     | III                      |                          |                        |
| ATCC       | <i>Leminorella</i> | <i>grimontii</i>   |          | 33999              | Human   | N/A     | III                      |                          |                        |
| ATCC       | <i>Morganella</i>  | <i>morganii</i>    |          | 25830              | Human   | N/A     | III                      |                          |                        |
| NOBL ATCC  | <i>Pasturella</i>  | <i>haemolytica</i> |          | 33396              | Sheep   | England | III                      |                          |                        |
| ATCC       | <i>Pasturella</i>  | <i>multocida</i>   |          | 12948              | Swine   | N/A     | III                      |                          |                        |
| ATCC       | <i>Proteus</i>     | <i>mirabilis</i>   |          | 7002               | Human   | N/A     | III                      |                          |                        |
| JN ATCC    | <i>Proteus</i>     | <i>vulgaris</i>    |          | 13315              | N/A     | N/A     | III                      |                          |                        |
| ATCC       | <i>Providencia</i> | <i>rettgeri</i>    |          | 29944              | N/A     | N/A     | III                      |                          |                        |
| ATCC       | <i>Providencia</i> | <i>stuartii</i>    |          | 29914              | Human   | USA     | III                      |                          |                        |
| NOBL ATCC  | <i>Pseudomonas</i> | <i>aeruginosa</i>  |          | 27853              | N/A     | N/A     | III                      |                          |                        |
| CDC        | <i>Salmonella</i>  |                    | O30      | CDC-9              | Human   | USA     | III                      |                          |                        |
| ATCC       | <i>Salmonella</i>  | <i>adelaide</i>    |          | 10718              | N/A     | N/A     | III                      |                          |                        |
| CDC        | <i>Salmonella</i>  | <i>agona</i>       |          | B94-007406         | Human   | USA     | III                      |                          |                        |
| ATCC       | <i>Salmonella</i>  | <i>anatum</i>      |          | 9270               | Swine   | USA     | III                      |                          |                        |
| ATCC       | <i>Salmonella</i>  | <i>arizonae</i>    |          | 13314              | N/A     | N/A     | III                      |                          |                        |
| BURWELL    | <i>Salmonella</i>  | <i>berta</i>       |          | 788                | N/A     | N/A     | III                      |                          |                        |
| CDC        | <i>Salmonella</i>  | <i>berta</i>       |          | B94-007417         | Human   | USA     | III                      |                          |                        |
| APHIS/NVSL | <i>Salmonella</i>  | <i>blegdam</i>     |          | 95-6319            | Chicken | USA     | III                      |                          |                        |
| CDC        | <i>Salmonella</i>  | <i>braenburg</i>   |          | H9812              | Human   | USA     | III                      |                          |                        |
| CDC        | <i>Salmonella</i>  | <i>braenderup</i>  |          | B94-007413         | Human   | USA     | III                      |                          |                        |
| CDC        | <i>Salmonella</i>  | <i>brandenburg</i> |          | B94-007420         | Human   | USA     | III                      |                          |                        |
| ATCC       | <i>Salmonella</i>  | <i>california</i>  |          | 23201              | Turkey  | N/A     | III                      |                          |                        |
| APHIS/NVSL | <i>Salmonella</i>  | <i>cerro</i>       |          | 94-6513            | N/A     | USA     | III                      |                          |                        |
| ATCC       | <i>Salmonella</i>  | <i>cholerasuis</i> |          | 13312              | N/A     | N/A     | III                      |                          |                        |
| APHIS/NVSL | <i>Salmonella</i>  | <i>cholersuis</i>  |          | 94-6531            | N/A     | USA     | III                      |                          |                        |
| CDC        | <i>Salmonella</i>  | <i>derby</i>       |          | B94-007419         | Human   | USA     | III                      |                          |                        |
| APHIS/NVSL | <i>Salmonella</i>  | <i>dublin</i>      |          | 95-10963           | Bovine  | USA     | III                      |                          |                        |
| APHIS/NVSL | <i>Salmonella</i>  | <i>dublin</i>      |          | 95-16283           | Bovine  | USA     | III                      |                          |                        |
| ATCC       | <i>Salmonella</i>  | <i>dublin</i>      |          | 15480              | N/A     | N/A     | III                      |                          |                        |
| APHIS/NVSL | <i>Salmonella</i>  | <i>duesseldorf</i> |          | 94-16453           | N/A     | USA     | III                      |                          |                        |
| APHIS/NVSL | <i>Salmonella</i>  | <i>enteritidis</i> |          | 94-6510            | N/A     | USA     | III                      |                          |                        |
| APHIS/NVSL | <i>Salmonella</i>  | <i>enteritidis</i> |          | 94-15238           | Bovine  | USA     | III                      |                          |                        |
| ATCC       | <i>Salmonella</i>  | <i>gallinarum</i>  |          | 9184               | N/A     | N/A     | III                      |                          |                        |
| APHIS/NVSL | <i>Salmonella</i>  | <i>give</i>        |          | 94-6283            | N/A     | USA     | III                      |                          |                        |
| CDC        | <i>Salmonella</i>  | <i>hadar</i>       |          | B94-007404         | Human   | USA     | III                      |                          |                        |
| CDC        | <i>Salmonella</i>  | <i>heidelberg</i>  |          | B94-007403         | Human   | USA     | III                      |                          |                        |
| CDC        | <i>Salmonella</i>  | <i>infantis</i>    |          | B94-007412         | Human   | USA     | III                      |                          |                        |
| APHIS/NVSL | <i>Salmonella</i>  | <i>istanbul</i>    |          | 94-5693            | N/A     | USA     | III                      |                          |                        |

Supplemental Table 1. Bacterial strains used for sequencing and MALDI-TOF validation

| Collection        | Genus                   | Species                   | Serotype      | Strain Designation | Source     | Country | Application <sup>a</sup> | Genbank accession number | Reference <sup>b</sup> |
|-------------------|-------------------------|---------------------------|---------------|--------------------|------------|---------|--------------------------|--------------------------|------------------------|
| CDC               | <i>Salmonella</i>       | <i>javiana</i>            |               | B94-007408         | Human      | USA     | III                      |                          |                        |
| APHIS/NVSL        | <i>Salmonella</i>       | <i>johannesburg</i>       |               | 94-5154            | N/A        | USA     | III                      |                          |                        |
| APHIS/NVSL        | <i>Salmonella</i>       | <i>kentucky</i>           |               | 94-6327            | N/A        | USA     | III                      |                          |                        |
| APHIS/NVSL        | <i>Salmonella</i>       | <i>landau</i>             |               | 92-8402            | N/A        | USA     | III                      |                          |                        |
| APHIS/NVSL        | <i>Salmonella</i>       | <i>mbandka</i>            |               | 10013              | Bovine     | USA     | III                      |                          |                        |
| SGSC              | <i>Salmonella</i>       | <i>miami</i>              |               | SARB 28            | Human      | N/A     | III                      |                          |                        |
| CDC               | <i>Salmonella</i>       | <i>montevideo</i>         |               | B94-007410         | Human      | USA     | III                      |                          |                        |
| CDC               | <i>Salmonella</i>       | <i>muenchen</i>           |               | B94-007414         | Human      | USA     | III                      |                          |                        |
| SGSC              | <i>Salmonella</i>       | <i>newport</i>            |               | SARB 36            | Human      | N/A     | III                      |                          |                        |
| UNL - E. Erickson | <i>Salmonella</i>       | <i>newport</i>            |               | 22851-95           | Bovine     | USA     | III                      |                          |                        |
| ATCC              | <i>Salmonella</i>       | <i>newport</i>            |               | 27869              | Human      | N/A     | III                      |                          |                        |
| APHIS/NVSL        | <i>Salmonella</i>       | <i>ohio</i>               |               | 94-5310            | N/A        | USA     | III                      |                          |                        |
| CDC               | <i>Salmonella</i>       | <i>oranienburg</i>        |               | B94-007409         | Human      | USA     | III                      |                          |                        |
| SGSC              | <i>Salmonella</i>       | <i>panama</i>             |               | SARB 40            | Human      | N/A     | III                      |                          |                        |
| ATCC              | <i>Salmonella</i>       | <i>paratyphi</i>          | A             | 9150               | N/A        | N/A     | III                      |                          |                        |
| SGSC              | <i>Salmonella</i>       | <i>paratyphi</i>          | B             | SARA 45            | Bovine     | France  | III                      |                          |                        |
| SGSC              | <i>Salmonella</i>       | <i>paratyphi</i>          | C             | SARB 49            | Human      | N/A     | III                      |                          |                        |
| CDC               | <i>Salmonella</i>       | <i>poona</i>              |               | B94-007418         | Human      | USA     | III                      |                          |                        |
| ATCC              | <i>Salmonella</i>       | <i>pullorum</i>           |               | 19945              | N/A        | N/A     | III                      |                          |                        |
| ATCC              | <i>Salmonella</i>       | <i>reading</i>            |               | 6967               | Guinea pig | N/A     | III                      |                          |                        |
| CDC               | <i>Salmonella</i>       | <i>saintpaul</i>          |               | B94-007411         | Human      | USA     | III                      |                          |                        |
| SGSC              | <i>Salmonella</i>       | <i>senftenberg</i>        |               | SARB 59            | Chicken    | N/A     | III                      |                          |                        |
| APHIS/NVSL        | <i>Salmonella</i>       | <i>soerenga</i>           |               | 90-13724           | N/A        | USA     | III                      |                          |                        |
| CDC               | <i>Salmonella</i>       | <i>thompson</i>           |               | B94-007407         | Human      | USA     | III                      |                          |                        |
| CDC               | <i>Salmonella</i>       | <i>typhi</i>              |               | B94-007415         | Human      | USA     | III                      |                          |                        |
| NADC              | <i>Salmonella</i>       | <i>typhimurium</i>        |               | 18898              | Bovine     | USA     | III                      |                          |                        |
| NADC              | <i>Salmonella</i>       | <i>typhimurium</i>        |               | 19617              | Bovine     | USA     | III                      |                          |                        |
| SGSC              | <i>Salmonella</i>       | <i>typhimurium</i>        |               | SARB 65            | Human      | N/A     | III                      |                          |                        |
| ATCC              | <i>Salmonella</i>       | <i>typhimurium</i>        |               | 14028              | Chicken    | USA     | III                      |                          |                        |
| ATCC              | <i>Salmonella</i>       | <i>typhimurium</i>        | copenhagen    | 6994               | N/A        | N/A     | III                      |                          |                        |
| CDC               | <i>Salmonella</i>       | <i>typhimurium</i>        | DT104         | G7601              | Human      | USA     | III                      |                          |                        |
| ATCC              | <i>Salmonella</i>       | <i>typhimurium</i>        | LT2 wild type | 19585              | N/A        | N/A     | III                      |                          |                        |
| SGSC              | <i>Salmonella</i>       | <i>wien</i>               |               | SARB 71            | Human      | N/A     | III                      |                          |                        |
| JN ATCC           | <i>Serratia</i>         | <i>marcescens</i>         |               | 8100               | N/A        | N/A     | III                      |                          |                        |
| ATCC              | <i>Shigella</i>         | <i>flexneri</i>           |               | 12022              | Human      | USA     | III                      |                          |                        |
| JN ATCC           | <i>Shigella</i>         | <i>sonnei</i>             |               | 25931              | Human      | USA     | III                      |                          |                        |
| ATCC              | <i>Stenotrophomonas</i> | <i>maltophilia</i>        |               | 13637              | Human      | N/A     | III                      |                          |                        |
| ATCC              | <i>Yersinia</i>         | <i>pseudotuberculosis</i> |               | 29910              | Human      | USA     | III                      |                          |                        |
| ATCC              | <i>Yersinia</i>         | <i>enterocolitica</i>     |               | 55075              | N/A        | Canada  | III                      |                          |                        |
| CDC               | <i>Escherichia</i>      | <i>coli</i>               | O103:H2       | 03-3058            | Human      | USA     | III                      |                          |                        |
| CDC               | <i>Escherichia</i>      | <i>coli</i>               | O103:H2       | 03-3112            | Human      | USA     | III                      |                          |                        |
| CDC               | <i>Escherichia</i>      | <i>coli</i>               | O103:NM       | 03-3243            | Human      | USA     | III                      |                          |                        |
| CDC               | <i>Escherichia</i>      | <i>coli</i>               | O103:H11      | 03-3297            | Human      | USA     | III                      |                          |                        |

Supplemental Table 1. Bacterial strains used for sequencing and MALDI-TOF validation

| Collection | Genus              | Species     | Serotype | Strain Designation | Source | Country | Application <sup>a</sup> | Genbank accession number | Reference <sup>b</sup> |
|------------|--------------------|-------------|----------|--------------------|--------|---------|--------------------------|--------------------------|------------------------|
| CDC        | <i>Escherichia</i> | <i>coli</i> | O103:H25 | 03-3313            | Human  | USA     | III                      |                          |                        |
| CDC        | <i>Escherichia</i> | <i>coli</i> | O103:H2  | 03-3356            | Human  | USA     | III                      |                          |                        |
| CDC        | <i>Escherichia</i> | <i>coli</i> | O103:H25 | 03-3399            | Human  | USA     | III                      |                          |                        |
| CDC        | <i>Escherichia</i> | <i>coli</i> | O103:H11 | 03-3444            | Human  | USA     | III                      |                          |                        |
| CDC        | <i>Escherichia</i> | <i>coli</i> | O103:H11 | 04-3021            | Human  | USA     | III                      |                          |                        |
| CDC        | <i>Escherichia</i> | <i>coli</i> | O103:H2  | 04-3027            | Human  | USA     | III                      |                          |                        |
| CDC        | <i>Escherichia</i> | <i>coli</i> | O103:H2  | 04-3056            | Human  | USA     | III                      |                          |                        |
| CDC        | <i>Escherichia</i> | <i>coli</i> | O103:H11 | 04-3092            | Human  | USA     | III                      |                          |                        |
| CDC        | <i>Escherichia</i> | <i>coli</i> | O103:H2  | 04-3508            | Human  | USA     | III                      |                          |                        |
| CDC        | <i>Escherichia</i> | <i>coli</i> | O103:H11 | 05-3048            | Human  | USA     | III                      |                          |                        |
| CDC        | <i>Escherichia</i> | <i>coli</i> | O103:H2  | 05-3112            | Human  | USA     | III                      |                          |                        |
| CDC        | <i>Escherichia</i> | <i>coli</i> | O103:H25 | 05-3286            | Human  | USA     | III                      |                          |                        |
| CDC        | <i>Escherichia</i> | <i>coli</i> | O103:H2  | 05-3319            | Human  | USA     | III                      |                          |                        |
| CDC        | <i>Escherichia</i> | <i>coli</i> | O103:H25 | 05-3546            | Human  | USA     | III                      |                          |                        |
| CDC        | <i>Escherichia</i> | <i>coli</i> | O103:H2  | 05-3554            | Human  | USA     | III                      |                          |                        |
| CDC        | <i>Escherichia</i> | <i>coli</i> | O103:H11 | 06-3008            | Human  | USA     | III                      |                          |                        |
| CDC        | <i>Escherichia</i> | <i>coli</i> | O103:H25 | 06-3066            | Human  | USA     | III                      |                          |                        |
| CDC        | <i>Escherichia</i> | <i>coli</i> | O103:H25 | 06-3088            | Human  | USA     | III                      |                          |                        |
| CDC        | <i>Escherichia</i> | <i>coli</i> | O103:H2  | 06-3539            | Human  | USA     | III                      |                          |                        |
| CDC        | <i>Escherichia</i> | <i>coli</i> | O103:H2  | 06-3562            | Human  | USA     | III                      |                          |                        |
| CDC        | <i>Escherichia</i> | <i>coli</i> | O103:H2  | 06-3584            | Human  | USA     | III                      |                          |                        |
| CDC        | <i>Escherichia</i> | <i>coli</i> | O103:H25 | 06-3908            | Human  | USA     | III                      |                          |                        |
| CDC        | <i>Escherichia</i> | <i>coli</i> | O103:H11 | 06-3938            | Human  | USA     | III                      |                          |                        |
| CDC        | <i>Escherichia</i> | <i>coli</i> | O103:H2  | 07-3006 A          | Human  | USA     | III                      |                          |                        |
| CDC        | <i>Escherichia</i> | <i>coli</i> | O103:H11 | 07-3008            | Human  | USA     | III                      |                          |                        |
| CDC        | <i>Escherichia</i> | <i>coli</i> | O103:H25 | 07-3009            | Human  | USA     | III                      |                          |                        |
| CDC        | <i>Escherichia</i> | <i>coli</i> | O103:H2  | 07-3070            | Human  | USA     | III                      |                          |                        |
| CDC        | <i>Escherichia</i> | <i>coli</i> | O103:H2  | 07-3081            | Human  | USA     | III                      |                          |                        |
| CDC        | <i>Escherichia</i> | <i>coli</i> | O103:H11 | 07-3137            | Human  | USA     | III                      |                          |                        |
| CDC        | <i>Escherichia</i> | <i>coli</i> | O103:H2  | 07-3138            | Human  | USA     | III                      |                          |                        |
| CDC        | <i>Escherichia</i> | <i>coli</i> | O103:H25 | 07-3202            | Human  | USA     | III                      |                          |                        |
| CDC        | <i>Escherichia</i> | <i>coli</i> | O103:H2  | 07-3261            | Human  | USA     | III                      |                          |                        |
| CDC        | <i>Escherichia</i> | <i>coli</i> | O103:H25 | 07-3482            | Human  | USA     | III                      |                          |                        |
| CDC        | <i>Escherichia</i> | <i>coli</i> | O103:H2  | 07-3691            | Human  | USA     | III                      |                          |                        |
| CDC        | <i>Escherichia</i> | <i>coli</i> | O103:NM  | 07-3787            | Human  | USA     | III                      |                          |                        |
| CDC        | <i>Escherichia</i> | <i>coli</i> | O103:NM  | 07-3841            | Human  | USA     | III                      |                          |                        |
| CDC        | <i>Escherichia</i> | <i>coli</i> | O103:H2  | 07-3855            | Human  | USA     | III                      |                          |                        |
| CDC        | <i>Escherichia</i> | <i>coli</i> | O103:H11 | 07-4192            | Human  | USA     | III                      |                          |                        |
| CDC        | <i>Escherichia</i> | <i>coli</i> | O103:H11 | 07-4284            | Human  | USA     | III                      |                          |                        |
| CDC        | <i>Escherichia</i> | <i>coli</i> | O103:H11 | 08-3073            | Human  | USA     | III                      |                          |                        |
| CDC        | <i>Escherichia</i> | <i>coli</i> | O103:H2  | 08-3268            | Human  | USA     | III                      |                          |                        |
| CDC        | <i>Escherichia</i> | <i>coli</i> | O103:H2  | 08-3321            | Human  | USA     | III                      |                          |                        |
| CDC        | <i>Escherichia</i> | <i>coli</i> | O103:H2  | 08-3366            | Human  | USA     | III                      |                          |                        |

Supplemental Table 1. Bacterial strains used for sequencing and MALDI-TOF validation

| Collection | Genus              | Species     | Serotype | Strain Designation | Source | Country | Application <sup>a</sup> | Genbank accession number | Reference <sup>b</sup> |
|------------|--------------------|-------------|----------|--------------------|--------|---------|--------------------------|--------------------------|------------------------|
| CDC        | <i>Escherichia</i> | <i>coli</i> | O103:H2  | 08-3367            | Human  | USA     | III                      |                          |                        |
| CDC        | <i>Escherichia</i> | <i>coli</i> | O103:H2  | 08-3368            | Human  | USA     | III                      |                          |                        |
| CDC        | <i>Escherichia</i> | <i>coli</i> | O103:H11 | 08-3466            | Human  | USA     | III                      |                          |                        |
| CDC        | <i>Escherichia</i> | <i>coli</i> | O103:H25 | 08-3567            | Human  | USA     | III                      |                          |                        |
| CDC        | <i>Escherichia</i> | <i>coli</i> | O103:H11 | 08-3644            | Human  | USA     | III                      |                          |                        |
| CDC        | <i>Escherichia</i> | <i>coli</i> | O103:H2  | 08-4010            | Human  | USA     | III                      |                          |                        |
| CDC        | <i>Escherichia</i> | <i>coli</i> | O103:H25 | 08-4032            | Human  | USA     | III                      |                          |                        |
| CDC        | <i>Escherichia</i> | <i>coli</i> | O103:H11 | 08-4040            | Human  | USA     | III                      |                          |                        |
| CDC        | <i>Escherichia</i> | <i>coli</i> | O103:H25 | 08-4050            | Human  | USA     | III                      |                          |                        |
| CDC        | <i>Escherichia</i> | <i>coli</i> | O103:H2  | 08-4066            | Human  | USA     | III                      |                          |                        |
| CDC        | <i>Escherichia</i> | <i>coli</i> | O103:H25 | 08-4082            | Human  | USA     | III                      |                          |                        |
| CDC        | <i>Escherichia</i> | <i>coli</i> | O103:H25 | 08-4273            | Human  | USA     | III                      |                          |                        |
| CDC        | <i>Escherichia</i> | <i>coli</i> | O103:H25 | 08-4363            | Human  | USA     | III                      |                          |                        |
| CDC        | <i>Escherichia</i> | <i>coli</i> | O103:H25 | 08-4373            | Human  | USA     | III                      |                          |                        |
| CDC        | <i>Escherichia</i> | <i>coli</i> | O103:H25 | 08-4631            | Human  | USA     | III                      |                          |                        |
| CDC        | <i>Escherichia</i> | <i>coli</i> | O103:H2  | 2009C-3015         | Human  | USA     | III                      |                          |                        |
| CDC        | <i>Escherichia</i> | <i>coli</i> | O103:H2  | 2009C-3025         | Human  | USA     | III                      |                          |                        |
| CDC        | <i>Escherichia</i> | <i>coli</i> | O103:H25 | 2009C-3274         | Human  | USA     | III                      |                          |                        |
| CDC        | <i>Escherichia</i> | <i>coli</i> | O103:H2  | 2009C-3279         | Human  | USA     | III                      |                          |                        |
| CDC        | <i>Escherichia</i> | <i>coli</i> | O103:H25 | 2009C-3333         | Human  | USA     | III                      |                          |                        |
| CDC        | <i>Escherichia</i> | <i>coli</i> | O103:H11 | 2009C-3690         | Human  | USA     | III                      |                          |                        |
| CDC        | <i>Escherichia</i> | <i>coli</i> | O103:H11 | 2009C-3786         | Human  | USA     | III                      |                          |                        |
| CDC        | <i>Escherichia</i> | <i>coli</i> | O103:H11 | 2009C-4002         | Human  | USA     | III                      |                          |                        |
| CDC        | <i>Escherichia</i> | <i>coli</i> | O103:H2  | 2009c-4089         | Human  | USA     | III                      |                          |                        |
| CDC        | <i>Escherichia</i> | <i>coli</i> | O103:H2  | 2009C-4822         | Human  | USA     | III                      |                          |                        |
| CDC        | <i>Escherichia</i> | <i>coli</i> | O103:H2  | 2010C-3032         | Human  | USA     | III                      |                          |                        |
| CDC        | <i>Escherichia</i> | <i>coli</i> | O103:H25 | 2010C-3047         | Human  | USA     | III                      |                          |                        |
| CDC        | <i>Escherichia</i> | <i>coli</i> | O103:H2  | 2010C-3213         | Human  | USA     | III                      |                          |                        |
| CDC        | <i>Escherichia</i> | <i>coli</i> | O103:H11 | 2010C-3214         | Human  | USA     | III                      |                          |                        |
| CDC        | <i>Escherichia</i> | <i>coli</i> | O103:H2  | 2010C-3403         | Human  | USA     | III                      |                          |                        |
| CDC        | <i>Escherichia</i> | <i>coli</i> | O103:H25 | 2010C-3450         | Human  | USA     | III                      |                          |                        |
| CDC        | <i>Escherichia</i> | <i>coli</i> | O103:H2  | 2010C-3652         | Human  | USA     | III                      |                          |                        |
| CDC        | <i>Escherichia</i> | <i>coli</i> | O103:H11 | 2010C-3669         | Human  | USA     | III                      |                          |                        |
| CDC        | <i>Escherichia</i> | <i>coli</i> | O103:H11 | 2010C-3788 A       | Human  | USA     | III                      |                          |                        |
| CDC        | <i>Escherichia</i> | <i>coli</i> | O103:NM  | 2010C-3845         | Human  | USA     | III                      |                          |                        |
| CDC        | <i>Escherichia</i> | <i>coli</i> | O103:H11 | 2010C-3848         | Human  | USA     | III                      |                          |                        |
| CDC        | <i>Escherichia</i> | <i>coli</i> | O103:H2  | 2010C-3943 C1      | Human  | USA     | III                      |                          |                        |
| CDC        | <i>Escherichia</i> | <i>coli</i> | O103:H2  | 2010C-4097         | Human  | USA     | III                      |                          |                        |
| CDC        | <i>Escherichia</i> | <i>coli</i> | O103:H25 | 2010C-4216         | Human  | USA     | III                      |                          |                        |
| CDC        | <i>Escherichia</i> | <i>coli</i> | O103:H11 | 2010C-4302 C2      | Human  | USA     | III                      |                          |                        |
| CDC        | <i>Escherichia</i> | <i>coli</i> | O103:H2  | 2010C-4433         | Human  | USA     | III                      |                          |                        |
| CDC        | <i>Escherichia</i> | <i>coli</i> | O103:H25 | 2010C-4529         | Human  | USA     | III                      |                          |                        |
| CDC        | <i>Escherichia</i> | <i>coli</i> | O103:H2  | 2010C-4766         | Human  | USA     | III                      |                          |                        |

Supplemental Table 1. Bacterial strains used for sequencing and MALDI-TOF validation

| Collection | Genus              | Species     | Serotype | Strain Designation | Source | Country | Application <sup>a</sup> | Genbank accession number | Reference <sup>b</sup> |
|------------|--------------------|-------------|----------|--------------------|--------|---------|--------------------------|--------------------------|------------------------|
| CDC        | <i>Escherichia</i> | <i>coli</i> | O103:H11 | 2011C-3009 C1      | Human  | USA     | III                      |                          |                        |
| CDC        | <i>Escherichia</i> | <i>coli</i> | O103:H11 | 2011C-3085         | Human  | USA     | III                      |                          |                        |
| CDC        | <i>Escherichia</i> | <i>coli</i> | O103:H25 | 2011C-3201         | Human  | USA     | III                      |                          |                        |
| CDC        | <i>Escherichia</i> | <i>coli</i> | O103:H25 | 2011C-3307         | Human  | USA     | III                      |                          |                        |
| CDC        | <i>Escherichia</i> | <i>coli</i> | O103:H11 | 2011C-3370         | Human  | USA     | III                      |                          |                        |
| CDC        | <i>Escherichia</i> | <i>coli</i> | O103:H11 | 2011C-3528         | Human  | USA     | III                      |                          |                        |
| CDC        | <i>Escherichia</i> | <i>coli</i> | O103:H25 | 2011C-3553         | Human  | USA     | III                      |                          |                        |
| CDC        | <i>Escherichia</i> | <i>coli</i> | O103:H2  | 2011C-3593         | Human  | USA     | III                      |                          |                        |
| CDC        | <i>Escherichia</i> | <i>coli</i> | O103:H2  | 2011C-3618         | Human  | USA     | III                      |                          |                        |
| CDC        | <i>Escherichia</i> | <i>coli</i> | O103:H2  | 2011C-3750         | Human  | USA     | III                      |                          |                        |
| CDC        | <i>Escherichia</i> | <i>coli</i> | O103:H11 | 2011C-4249 C2      | Human  | USA     | III                      |                          |                        |
| CDC        | <i>Escherichia</i> | <i>coli</i> | O26:H11  | 00-3305            | Human  | USA     | III                      |                          |                        |
| CDC        | <i>Escherichia</i> | <i>coli</i> | O26:H11  | 01-3276            | Human  | USA     | III                      |                          |                        |
| CDC        | <i>Escherichia</i> | <i>coli</i> | O26:H11  | 02-3274            | Human  | USA     | III                      |                          |                        |
| CDC        | <i>Escherichia</i> | <i>coli</i> | O26:H11  | 03-3318            | Human  | USA     | III                      |                          |                        |
| CDC        | <i>Escherichia</i> | <i>coli</i> | O26:H11  | 03-3469            | Human  | USA     | III                      |                          |                        |
| CDC        | <i>Escherichia</i> | <i>coli</i> | O26:H11  | 03-3502            | Human  | USA     | III                      |                          |                        |
| CDC        | <i>Escherichia</i> | <i>coli</i> | O26:H11  | 03-3503            | Human  | USA     | III                      |                          |                        |
| CDC        | <i>Escherichia</i> | <i>coli</i> | O26:H11  | 03-3505            | Human  | USA     | III                      |                          |                        |
| CDC        | <i>Escherichia</i> | <i>coli</i> | O26:H11  | 03-3507            | Human  | USA     | III                      |                          |                        |
| CDC        | <i>Escherichia</i> | <i>coli</i> | O26:H11  | 04-3120            | Human  | USA     | III                      |                          |                        |
| CDC        | <i>Escherichia</i> | <i>coli</i> | O26:H11  | 04-3162            | Human  | USA     | III                      |                          |                        |
| CDC        | <i>Escherichia</i> | <i>coli</i> | O26:H11  | 04-3195            | Human  | USA     | III                      |                          |                        |
| CDC        | <i>Escherichia</i> | <i>coli</i> | O26:H11  | 04-3197            | Human  | USA     | III                      |                          |                        |
| CDC        | <i>Escherichia</i> | <i>coli</i> | O26:H11  | 04-3313            | Human  | USA     | III                      |                          |                        |
| CDC        | <i>Escherichia</i> | <i>coli</i> | O26:H11  | 04-3517            | Human  | USA     | III                      |                          |                        |
| CDC        | <i>Escherichia</i> | <i>coli</i> | O26:H11  | 05-3646            | Human  | USA     | III                      |                          |                        |
| CDC        | <i>Escherichia</i> | <i>coli</i> | O26:NM   | 06-3235            | Human  | USA     | III                      |                          |                        |
| CDC        | <i>Escherichia</i> | <i>coli</i> | O26:H11  | 06-3603            | Human  | USA     | III                      |                          |                        |
| CDC        | <i>Escherichia</i> | <i>coli</i> | O26:H11  | 06-3653            | Human  | USA     | III                      |                          |                        |
| CDC        | <i>Escherichia</i> | <i>coli</i> | O26:H11  | 06-3695            | Human  | USA     | III                      |                          |                        |
| CDC        | <i>Escherichia</i> | <i>coli</i> | O26:H11  | 07-3721            | Human  | USA     | III                      |                          |                        |
| CDC        | <i>Escherichia</i> | <i>coli</i> | O26:H11  | 07-3769            | Human  | USA     | III                      |                          |                        |
| CDC        | <i>Escherichia</i> | <i>coli</i> | O26:H11  | 07-3862            | Human  | USA     | III                      |                          |                        |
| CDC        | <i>Escherichia</i> | <i>coli</i> | O26:H11  | 07-3986            | Human  | USA     | III                      |                          |                        |
| CDC        | <i>Escherichia</i> | <i>coli</i> | O26:NM   | 08-3084            | Human  | USA     | III                      |                          |                        |
| CDC        | <i>Escherichia</i> | <i>coli</i> | O26:NM   | 08-3200            | Human  | USA     | III                      |                          |                        |
| CDC        | <i>Escherichia</i> | <i>coli</i> | O26:H11  | 08-3502            | Human  | USA     | III                      |                          |                        |
| CDC        | <i>Escherichia</i> | <i>coli</i> | O26:H11  | 08-3832            | Human  | USA     | III                      |                          |                        |
| CDC        | <i>Escherichia</i> | <i>coli</i> | O26:H11  | 08-4361            | Human  | USA     | III                      |                          |                        |
| CDC        | <i>Escherichia</i> | <i>coli</i> | O26:H11  | 08-4392            | Human  | USA     | III                      |                          |                        |
| CDC        | <i>Escherichia</i> | <i>coli</i> | O26:H11  | 08-4484            | Human  | USA     | III                      |                          |                        |
| CDC        | <i>Escherichia</i> | <i>coli</i> | O26:NM   | 2009C-3523         | Human  | USA     | III                      |                          |                        |

Supplemental Table 1. Bacterial strains used for sequencing and MALDI-TOF validation

| Collection | Genus              | Species     | Serotype | Strain Designation | Source | Country | Application <sup>a</sup> | Genbank accession number | Reference <sup>b</sup> |
|------------|--------------------|-------------|----------|--------------------|--------|---------|--------------------------|--------------------------|------------------------|
| CDC        | <i>Escherichia</i> | <i>coli</i> | O26:H11  | 2009C-3568         | Human  | USA     | III                      |                          |                        |
| CDC        | <i>Escherichia</i> | <i>coli</i> | O26:H11  | 2009C-3589         | Human  | USA     | III                      |                          |                        |
| CDC        | <i>Escherichia</i> | <i>coli</i> | O26:H11  | 2009C-3753         | Human  | USA     | III                      |                          |                        |
| CDC        | <i>Escherichia</i> | <i>coli</i> | O26:H11  | 2009C-3904         | Human  | USA     | III                      |                          |                        |
| CDC        | <i>Escherichia</i> | <i>coli</i> | O26:H32  | 00-3258 (ETEC)     | Human  | USA     | III                      |                          |                        |
| CDC        | <i>Escherichia</i> | <i>coli</i> | O26:H11  | 03-3500            | Human  | USA     | III                      |                          |                        |
| CDC        | <i>Escherichia</i> | <i>coli</i> | O26:H11  | 06-3464            | Human  | USA     | III                      |                          |                        |
| CDC        | <i>Escherichia</i> | <i>coli</i> | O26:H11  | 2009C-3996         | Human  | USA     | III                      |                          |                        |
| CDC        | <i>Escherichia</i> | <i>coli</i> | O26:H11  | 2009C-4747         | Human  | USA     | III                      |                          |                        |
| CDC        | <i>Escherichia</i> | <i>coli</i> | O26:H11  | 2009C-4760         | Human  | USA     | III                      |                          |                        |
| CDC        | <i>Escherichia</i> | <i>coli</i> | O26:H11  | 2009C-4826         | Human  | USA     | III                      |                          |                        |
| CDC        | <i>Escherichia</i> | <i>coli</i> | O26:H11  | 2010C-3051         | Human  | USA     | III                      |                          |                        |
| CDC        | <i>Escherichia</i> | <i>coli</i> | O26:H11  | 2010C-3472         | Human  | USA     | III                      |                          |                        |
| CDC        | <i>Escherichia</i> | <i>coli</i> | O26:H11  | 2010C-3871         | Human  | USA     | III                      |                          |                        |
| CDC        | <i>Escherichia</i> | <i>coli</i> | O26:H11  | 2010C-4244         | Human  | USA     | III                      |                          |                        |
| CDC        | <i>Escherichia</i> | <i>coli</i> | O26:NM   | 2010C-4347         | Human  | USA     | III                      |                          |                        |
| CDC        | <i>Escherichia</i> | <i>coli</i> | O26:H11  | 2010C-4430         | Human  | USA     | III                      |                          |                        |
| CDC        | <i>Escherichia</i> | <i>coli</i> | O26:NM   | 2010C-4788         | Human  | USA     | III                      |                          |                        |
| CDC        | <i>Escherichia</i> | <i>coli</i> | O26:H11  | 2010C-4834         | Human  | USA     | III                      |                          |                        |
| CDC        | <i>Escherichia</i> | <i>coli</i> | O26:H11  | 2010C-5028         | Human  | USA     | III                      |                          |                        |
| CDC        | <i>Escherichia</i> | <i>coli</i> | O26:H11  | 2010EL-1699        | Human  | USA     | III                      |                          |                        |
| CDC        | <i>Escherichia</i> | <i>coli</i> | O26:H11  | 2011C-3270         | Human  | USA     | III                      |                          |                        |
| CDC        | <i>Escherichia</i> | <i>coli</i> | O26:H11  | 2011C-3274         | Human  | USA     | III                      |                          |                        |
| CDC        | <i>Escherichia</i> | <i>coli</i> | O26:H11  | 2011C-3282         | Human  | USA     | III                      |                          |                        |
| CDC        | <i>Escherichia</i> | <i>coli</i> | O26:H11  | 2011C-3387         | Human  | USA     | III                      |                          |                        |
| CDC        | <i>Escherichia</i> | <i>coli</i> | O26:H11  | 2011C-3506         | Human  | USA     | III                      |                          |                        |
| CDC        | <i>Escherichia</i> | <i>coli</i> | O26:H11  | 2011C-3655         | Human  | USA     | III                      |                          |                        |
| CDC        | <i>Escherichia</i> | <i>coli</i> | O45:H31  | 00-3140            | Human  | USA     | III                      |                          |                        |
| CDC        | <i>Escherichia</i> | <i>coli</i> | O45:H2   | 01-3080            | Human  | USA     | III                      |                          |                        |
| CDC        | <i>Escherichia</i> | <i>coli</i> | O45:H2   | 01-3147            | Human  | USA     | III                      |                          |                        |
| CDC        | <i>Escherichia</i> | <i>coli</i> | O45:H2   | 01-3510            | Human  | USA     | III                      |                          |                        |
| CDC        | <i>Escherichia</i> | <i>coli</i> | O45:H2   | 02-3169            | Human  | USA     | III                      |                          |                        |
| CDC        | <i>Escherichia</i> | <i>coli</i> | O45:H2   | 02-3351            | Human  | USA     | III                      |                          |                        |
| CDC        | <i>Escherichia</i> | <i>coli</i> | O45:H2   | 03-3322            | Human  | USA     | III                      |                          |                        |
| CDC        | <i>Escherichia</i> | <i>coli</i> | O45:H2   | 03-3395            | Human  | USA     | III                      |                          |                        |
| CDC        | <i>Escherichia</i> | <i>coli</i> | O45:H2   | 04-3206            | Human  | USA     | III                      |                          |                        |
| CDC        | <i>Escherichia</i> | <i>coli</i> | O45:H2   | 04-3409            | Human  | USA     | III                      |                          |                        |
| CDC        | <i>Escherichia</i> | <i>coli</i> | O45:H2   | 05-3269            | Human  | USA     | III                      |                          |                        |
| CDC        | <i>Escherichia</i> | <i>coli</i> | O45:H2   | 05-3508            | Human  | USA     | III                      |                          |                        |
| CDC        | <i>Escherichia</i> | <i>coli</i> | O45:H2   | 06-3559            | Human  | USA     | III                      |                          |                        |
| CDC        | <i>Escherichia</i> | <i>coli</i> | O45:H2   | 06-3990            | Human  | USA     | III                      |                          |                        |
| CDC        | <i>Escherichia</i> | <i>coli</i> | O45:H19  | 07-3668 C1         | Human  | USA     | III                      |                          |                        |
| CDC        | <i>Escherichia</i> | <i>coli</i> | O45:H2   | 07-4310            | Human  | USA     | III                      |                          |                        |

Supplemental Table 1. Bacterial strains used for sequencing and MALDI-TOF validation

| Collection | Genus              | Species     | Serotype | Strain Designation | Source | Country | Application <sup>a</sup> | Genbank accession number | Reference <sup>b</sup> |
|------------|--------------------|-------------|----------|--------------------|--------|---------|--------------------------|--------------------------|------------------------|
| CDC        | <i>Escherichia</i> | <i>coli</i> | O45:H2   | 07-4361            | Human  | USA     | III                      |                          |                        |
| CDC        | <i>Escherichia</i> | <i>coli</i> | O45:H2   | 08-3079            | Human  | USA     | III                      |                          |                        |
| CDC        | <i>Escherichia</i> | <i>coli</i> | O45:H2   | 08-4498            | Human  | USA     | III                      |                          |                        |
| CDC        | <i>Escherichia</i> | <i>coli</i> | O45:H2   | 2009C-3023         | Human  | USA     | III                      |                          |                        |
| CDC        | <i>Escherichia</i> | <i>coli</i> | O45:H2   | 2009C-3619         | Human  | USA     | III                      |                          |                        |
| CDC        | <i>Escherichia</i> | <i>coli</i> | O45:H2   | 2009C-3686         | Human  | USA     | III                      |                          |                        |
| CDC        | <i>Escherichia</i> | <i>coli</i> | O45:NM   | 2009C-3772         | Human  | USA     | III                      |                          |                        |
| CDC        | <i>Escherichia</i> | <i>coli</i> | O45:H2   | 2009C-4040         | Human  | USA     | III                      |                          |                        |
| CDC        | <i>Escherichia</i> | <i>coli</i> | O45:NM   | 2009C-4401         | Human  | USA     | III                      |                          |                        |
| CDC        | <i>Escherichia</i> | <i>coli</i> | O45:H2   | 2009C-4603         | Human  | USA     | III                      |                          |                        |
| CDC        | <i>Escherichia</i> | <i>coli</i> | O45:H2   | 2009C-4780         | Human  | USA     | III                      |                          |                        |
| CDC        | <i>Escherichia</i> | <i>coli</i> | O45:H2   | 2009C-4781         | Human  | USA     | III                      |                          |                        |
| CDC        | <i>Escherichia</i> | <i>coli</i> | O45:H2   | 2009C-4801         | Human  | USA     | III                      |                          |                        |
| CDC        | <i>Escherichia</i> | <i>coli</i> | O45:H2   | 2010C-3166         | Human  | USA     | III                      |                          |                        |
| CDC        | <i>Escherichia</i> | <i>coli</i> | O45:H2   | 2010C-3419         | Human  | USA     | III                      |                          |                        |
| CDC        | <i>Escherichia</i> | <i>coli</i> | O45:H2   | 2010C-3657         | Human  | USA     | III                      |                          |                        |
| CDC        | <i>Escherichia</i> | <i>coli</i> | O45:H2   | 2010C-3876         | Human  | USA     | III                      |                          |                        |
| CDC        | <i>Escherichia</i> | <i>coli</i> | O45:H2   | 2010C-4211         | Human  | USA     | III                      |                          |                        |
| CDC        | <i>Escherichia</i> | <i>coli</i> | O45:H2   | 2010C-4340 C1      | Human  | USA     | III                      |                          |                        |
| CDC        | <i>Escherichia</i> | <i>coli</i> | O45:H2   | 2010C-4397         | Human  | USA     | III                      |                          |                        |
| CDC        | <i>Escherichia</i> | <i>coli</i> | O45:H2   | 2010C-4884         | Human  | USA     | III                      |                          |                        |
| CDC        | <i>Escherichia</i> | <i>coli</i> | O45:NM   | 2011C-3025         | Human  | USA     | III                      |                          |                        |
| CDC        | <i>Escherichia</i> | <i>coli</i> | O45:H2   | 2011C-3398         | Human  | USA     | III                      |                          |                        |
| CDC        | <i>Escherichia</i> | <i>coli</i> | O45:H2   | 2011C-3536         | Human  | USA     | III                      |                          |                        |
| CDC        | <i>Escherichia</i> | <i>coli</i> | O111:H8  | 97-3215            | Human  | USA     | III                      |                          |                        |
| CDC        | <i>Escherichia</i> | <i>coli</i> | O111:H8  | 99-3215            | Human  | USA     | III                      |                          |                        |
| CDC        | <i>Escherichia</i> | <i>coli</i> | O111:NM  | 00-3158            | Human  | USA     | III                      |                          |                        |
| CDC        | <i>Escherichia</i> | <i>coli</i> | O111:NM  | 01-3076            | Human  | USA     | III                      |                          |                        |
| CDC        | <i>Escherichia</i> | <i>coli</i> | O111:NM  | 01-3464            | Human  | USA     | III                      |                          |                        |
| CDC        | <i>Escherichia</i> | <i>coli</i> | O111:NM  | 02-3194            | Human  | USA     | III                      |                          |                        |
| CDC        | <i>Escherichia</i> | <i>coli</i> | O111:NM  | 02-3334            | Human  | USA     | III                      |                          |                        |
| CDC        | <i>Escherichia</i> | <i>coli</i> | O111:NM  | 02-3342            | Human  | USA     | III                      |                          |                        |
| CDC        | <i>Escherichia</i> | <i>coli</i> | O111:NM  | 03-3296            | Human  | USA     | III                      |                          |                        |
| CDC        | <i>Escherichia</i> | <i>coli</i> | O111:NM  | 03-3390            | Human  | USA     | III                      |                          |                        |
| CDC        | <i>Escherichia</i> | <i>coli</i> | O111:NM  | 03-3428            | Human  | USA     | III                      |                          |                        |
| CDC        | <i>Escherichia</i> | <i>coli</i> | O111:NM  | 03-3484            | Human  | USA     | III                      |                          |                        |
| CDC        | <i>Escherichia</i> | <i>coli</i> | O111:H8  | 05-3004            | Human  | USA     | III                      |                          |                        |
| CDC        | <i>Escherichia</i> | <i>coli</i> | O111:NM  | 06-3682            | Human  | USA     | III                      |                          |                        |
| CDC        | <i>Escherichia</i> | <i>coli</i> | O111:NM  | 06-3805            | Human  | USA     | III                      |                          |                        |
| CDC        | <i>Escherichia</i> | <i>coli</i> | O111:NM  | 07-3376            | Human  | USA     | III                      |                          |                        |
| CDC        | <i>Escherichia</i> | <i>coli</i> | O111:H2  | 08-3342            | Human  | USA     | III                      |                          |                        |
| CDC        | <i>Escherichia</i> | <i>coli</i> | O111:NM  | 08-3753            | Human  | USA     | III                      |                          |                        |
| CDC        | <i>Escherichia</i> | <i>coli</i> | O111:H8  | 08-4347            | Human  | USA     | III                      |                          |                        |

Supplemental Table 1. Bacterial strains used for sequencing and MALDI-TOF validation

| Collection | Genus              | Species     | Serotype | Strain Designation | Source | Country | Application <sup>a</sup> | Genbank accession number | Reference <sup>b</sup> |
|------------|--------------------|-------------|----------|--------------------|--------|---------|--------------------------|--------------------------|------------------------|
| CDC        | <i>Escherichia</i> | <i>coli</i> | O111:NM  | 08-4374            | Human  | USA     | III                      |                          |                        |
| CDC        | <i>Escherichia</i> | <i>coli</i> | O111:NM  | 08-4376            | Human  | USA     | III                      |                          |                        |
| CDC        | <i>Escherichia</i> | <i>coli</i> | O111:NM  | 08-4377            | Human  | USA     | III                      |                          |                        |
| CDC        | <i>Escherichia</i> | <i>coli</i> | O111:NM  | 08-4378            | Human  | USA     | III                      |                          |                        |
| CDC        | <i>Escherichia</i> | <i>coli</i> | O111:H8  | 08-4386            | Human  | USA     | III                      |                          |                        |
| CDC        | <i>Escherichia</i> | <i>coli</i> | O111:NM  | 08-4387            | Human  | USA     | III                      |                          |                        |
| CDC        | <i>Escherichia</i> | <i>coli</i> | O111:NM  | 08-4391            | Human  | USA     | III                      |                          |                        |
| CDC        | <i>Escherichia</i> | <i>coli</i> | O111:NM  | 08-4414            | Human  | USA     | III                      |                          |                        |
| CDC        | <i>Escherichia</i> | <i>coli</i> | O111:H8  | 08-4455            | Human  | USA     | III                      |                          |                        |
| CDC        | <i>Escherichia</i> | <i>coli</i> | O111:NM  | 08-4487            | Human  | USA     | III                      |                          |                        |
| CDC        | <i>Escherichia</i> | <i>coli</i> | O111:NM  | 08-4616            | Human  | USA     | III                      |                          |                        |
| CDC        | <i>Escherichia</i> | <i>coli</i> | O111:NM  | 2009C-3342         | Human  | USA     | III                      |                          |                        |
| CDC        | <i>Escherichia</i> | <i>coli</i> | O111:H8  | 2009C-3586         | Human  | USA     | III                      |                          |                        |
| CDC        | <i>Escherichia</i> | <i>coli</i> | O111:NM  | 2009C-3675         | Human  | USA     | III                      |                          |                        |
| CDC        | <i>Escherichia</i> | <i>coli</i> | O111:NM  | 2009C-3728         | Human  | USA     | III                      |                          |                        |
| CDC        | <i>Escherichia</i> | <i>coli</i> | O111:NM  | 2009C-3920         | Human  | USA     | III                      |                          |                        |
| CDC        | <i>Escherichia</i> | <i>coli</i> | O111:NM  | 2009C-3984         | Human  | USA     | III                      |                          |                        |
| CDC        | <i>Escherichia</i> | <i>coli</i> | O111:NM  | 2009C-4006         | Human  | USA     | III                      |                          |                        |
| CDC        | <i>Escherichia</i> | <i>coli</i> | O111:H8  | 2009EL-1666        | Human  | USA     | III                      |                          |                        |
| CDC        | <i>Escherichia</i> | <i>coli</i> | O111:NM  | 01-3076            | Human  | USA     | III                      |                          |                        |
| CDC        | <i>Escherichia</i> | <i>coli</i> | O111:NM  | 03-3484            | Human  | USA     | III                      |                          |                        |
| CDC        | <i>Escherichia</i> | <i>coli</i> | O111:NM  | 04-3211            | Human  | USA     | III                      |                          |                        |
| CDC        | <i>Escherichia</i> | <i>coli</i> | O111:NM  | 08-4487            | Human  | USA     | III                      |                          |                        |
| CDC        | <i>Escherichia</i> | <i>coli</i> | O111:NM  | 2009C-4006         | Human  | USA     | III                      |                          |                        |
| CDC        | <i>Escherichia</i> | <i>coli</i> | O111:NM  | 2009C-4052         | Human  | USA     | III                      |                          |                        |
| CDC        | <i>Escherichia</i> | <i>coli</i> | O111:H8  | 2009C-4126         | Human  | USA     | III                      |                          |                        |
| CDC        | <i>Escherichia</i> | <i>coli</i> | O111:H8  | 2009EL-2169        | Human  | USA     | III                      |                          |                        |
| CDC        | <i>Escherichia</i> | <i>coli</i> | O111:NM  | 2010C-3053         | Human  | USA     | III                      |                          |                        |
| CDC        | <i>Escherichia</i> | <i>coli</i> | O111:NM  | 2010C-3977         | Human  | USA     | III                      |                          |                        |
| CDC        | <i>Escherichia</i> | <i>coli</i> | O111:NM  | 2010C-4086         | Human  | USA     | III                      |                          |                        |
| CDC        | <i>Escherichia</i> | <i>coli</i> | O111:NM  | 2010C-4221         | Human  | USA     | III                      |                          |                        |
| CDC        | <i>Escherichia</i> | <i>coli</i> | O111:NM  | 2010C-4592         | Human  | USA     | III                      |                          |                        |
| CDC        | <i>Escherichia</i> | <i>coli</i> | O111:NM  | 2010C-4622         | Human  | USA     | III                      |                          |                        |
| CDC        | <i>Escherichia</i> | <i>coli</i> | O111:NM  | 2010C-4715         | Human  | USA     | III                      |                          |                        |
| CDC        | <i>Escherichia</i> | <i>coli</i> | O111:NM  | 2010C-4735         | Human  | USA     | III                      |                          |                        |
| CDC        | <i>Escherichia</i> | <i>coli</i> | O111:NM  | 2010C-4746         | Human  | USA     | III                      |                          |                        |
| CDC        | <i>Escherichia</i> | <i>coli</i> | O111:NM  | 2010C-4799         | Human  | USA     | III                      |                          |                        |
| CDC        | <i>Escherichia</i> | <i>coli</i> | O111:NM  | 2010C-4818         | Human  | USA     | III                      |                          |                        |
| CDC        | <i>Escherichia</i> | <i>coli</i> | O111:NM  | 2011C-3170         | Human  | USA     | III                      |                          |                        |
| CDC        | <i>Escherichia</i> | <i>coli</i> | O111:NM  | 2011C-3362         | Human  | USA     | III                      |                          |                        |
| CDC        | <i>Escherichia</i> | <i>coli</i> | O111:NM  | 2011C-3453         | Human  | USA     | III                      |                          |                        |
| CDC        | <i>Escherichia</i> | <i>coli</i> | O111:NM  | 2011C-3573         | Human  | USA     | III                      |                          |                        |
| CDC        | <i>Escherichia</i> | <i>coli</i> | O111:NM  | 2011C-3632         | Human  | USA     | III                      |                          |                        |

Supplemental Table 1. Bacterial strains used for sequencing and MALDI-TOF validation

| Collection | Genus              | Species              | Serotype | Strain Designation | Source | Country | Application <sup>a</sup> | Genbank accession number | Reference <sup>b</sup> |
|------------|--------------------|----------------------|----------|--------------------|--------|---------|--------------------------|--------------------------|------------------------|
| CDC        | <i>Escherichia</i> | <i>coli</i>          | O111:NM  | 2011C-3679         | Human  | USA     | III                      |                          |                        |
| CDC        | <i>Escherichia</i> | <i>coli</i>          | O121:H19 | 03-3227            | Human  | USA     | III                      |                          |                        |
| CDC        | <i>Escherichia</i> | <i>coli</i>          | O121:H19 | 06-3003            | Human  | USA     | III                      |                          |                        |
| CDC        | <i>Escherichia</i> | <i>coli</i>          | O121:H19 | 06-3822            | Human  | USA     | III                      |                          |                        |
| CDC        | <i>Escherichia</i> | <i>coli</i>          | O121:H7  | 2009C-3299         | Human  | USA     | III                      |                          |                        |
| CDC        | <i>Escherichia</i> | <i>coli</i>          | O121:H19 | 2009C-4050         | Human  | USA     | III                      |                          |                        |
| CDC        | <i>Escherichia</i> | <i>coli</i>          | O121:H19 | 2009C-4659         | Human  | USA     | III                      |                          |                        |
| CDC        | <i>Escherichia</i> | <i>coli</i>          | O121:H19 | 2009C-4750         | Human  | USA     | III                      |                          |                        |
| CDC        | <i>Escherichia</i> | <i>coli</i>          | O121:H19 | 2009EL-1302        | Human  | USA     | III                      |                          |                        |
| CDC        | <i>Escherichia</i> | <i>coli</i>          | O121:H19 | 2009EL-1412        | Human  | USA     | III                      |                          |                        |
| CDC        | <i>Escherichia</i> | <i>coli</i>          | O121:H19 | 2010C-3609         | Human  | USA     | III                      |                          |                        |
| CDC        | <i>Escherichia</i> | <i>coli</i>          | O121:H19 | 2010C-3794         | Human  | USA     | III                      |                          |                        |
| CDC        | <i>Escherichia</i> | <i>coli</i>          | O121:H19 | 2010C-3840         | Human  | USA     | III                      |                          |                        |
| CDC        | <i>Escherichia</i> | <i>coli</i>          | O121:H19 | 2010C-4254         | Human  | USA     | III                      |                          |                        |
| CDC        | <i>Escherichia</i> | <i>coli</i>          | O121:H19 | 2010C-4732 C1      | Human  | USA     | III                      |                          |                        |
| CDC        | <i>Escherichia</i> | <i>coli</i>          | O121:H19 | 2010C-4966         | Human  | USA     | III                      |                          |                        |
| CDC        | <i>Escherichia</i> | <i>coli</i>          | O121:H19 | 2010C-4989         | Human  | USA     | III                      |                          |                        |
| CDC        | <i>Escherichia</i> | <i>coli</i>          | O121:H19 | 2011C-3108         | Human  | USA     | III                      |                          |                        |
| CDC        | <i>Escherichia</i> | <i>coli</i>          | O121:H19 | 2011C-3216         | Human  | USA     | III                      |                          |                        |
| CDC        | <i>Escherichia</i> | <i>coli</i>          | O121:H19 | 2011C-3500         | Human  | USA     | III                      |                          |                        |
| CDC        | <i>Escherichia</i> | <i>coli</i>          | O121:H19 | 2011C-3537         | Human  | USA     | III                      |                          |                        |
| CDC        | <i>Escherichia</i> | <i>coli</i>          | O121:H19 | 2011C-3609         | Human  | USA     | III                      |                          |                        |
| CDC        | <i>Escherichia</i> | <i>coli</i>          | O121:H19 | K5269              | Human  | USA     | III                      |                          |                        |
| CDC        | <i>Escherichia</i> | <i>coli</i>          | O121:H19 | 97-3093            | Human  | USA     | III                      |                          |                        |
| CDC        | <i>Escherichia</i> | <i>coli</i>          | O121:H19 | 98-3221            | Human  | USA     | III                      |                          |                        |
| CDC        | <i>Escherichia</i> | <i>coli</i>          | O121:H19 | 99-3323 C1         | Human  | USA     | III                      |                          |                        |
| CDC        | <i>Escherichia</i> | <i>coli</i>          | O121:H19 | 00-3024            | Human  | USA     | III                      |                          |                        |
| CDC        | <i>Escherichia</i> | <i>coli</i>          | O121:H19 | 00-3071            | Human  | USA     | III                      |                          |                        |
| CDC        | <i>Escherichia</i> | <i>coli</i>          | O121:H19 | 00-3100            | Human  | USA     | III                      |                          |                        |
| CDC        | <i>Escherichia</i> | <i>coli</i>          | O121:H19 | 00-3266            | Human  | USA     | III                      |                          |                        |
| CDC        | <i>Escherichia</i> | <i>coli</i>          | O121:H7  | 00-3395            | Human  | USA     | III                      |                          |                        |
| CDC        | <i>Shigella</i>    | <i>dysenteriae</i> 7 |          | 53-4788            | Human  | USA     | III                      |                          |                        |
| CDC        | <i>Escherichia</i> | <i>coli</i>          | O121:NM  | 98-3306            | Human  | USA     | III                      |                          |                        |
| CDC        | <i>Escherichia</i> | <i>coli</i>          | O121:NM  | 2010C-4003         | Human  | USA     | III                      |                          |                        |
| CDC        | <i>Escherichia</i> | <i>coli</i>          | O121:NM  | 2010C-4005         | Human  | USA     | III                      |                          |                        |
| CDC        | <i>Escherichia</i> | <i>coli</i>          | O145:NM  | 01-3013            | Human  | USA     | III                      |                          |                        |
| CDC        | <i>Escherichia</i> | <i>coli</i>          | O145:NM  | 01-3131            | Human  | USA     | III                      |                          |                        |
| CDC        | <i>Escherichia</i> | <i>coli</i>          | O145:NM  | 01-3472            | Human  | USA     | III                      |                          |                        |
| CDC        | <i>Escherichia</i> | <i>coli</i>          | O118:NM  | 02-3132            | Human  | USA     | III                      |                          |                        |
| CDC        | <i>Escherichia</i> | <i>coli</i>          | O145:NM  | 02-3136            | Human  | USA     | III                      |                          |                        |
| CDC        | <i>Escherichia</i> | <i>coli</i>          | O145:NM  | 02-3333            | Human  | USA     | III                      |                          |                        |
| CDC        | <i>Escherichia</i> | <i>coli</i>          | O145:NM  | 03-3016            | Human  | USA     | III                      |                          |                        |
| CDC        | <i>Escherichia</i> | <i>coli</i>          | O145:NM  | 03-3226            | Human  | USA     | III                      |                          |                        |

Supplemental Table 1. Bacterial strains used for sequencing and MALDI-TOF validation

| Collection | Genus              | Species     | Serotype | Strain Designation | Source | Country | Application <sup>a</sup> | Genbank accession number | Reference <sup>b</sup> |
|------------|--------------------|-------------|----------|--------------------|--------|---------|--------------------------|--------------------------|------------------------|
| CDC        | <i>Escherichia</i> | <i>coli</i> | O145:NM  | 03-3466            | Human  | USA     | III                      |                          |                        |
| CDC        | <i>Escherichia</i> | <i>coli</i> | O145:NM  | 04-3312            | Human  | USA     | III                      |                          |                        |
| CDC        | <i>Escherichia</i> | <i>coli</i> | O145:NM  | 04-3377            | Human  | USA     | III                      |                          |                        |
| CDC        | <i>Escherichia</i> | <i>coli</i> | O145:NM  | 04-3447            | Human  | USA     | III                      |                          |                        |
| CDC        | <i>Escherichia</i> | <i>coli</i> | O145:NM  | 05-3158            | Human  | USA     | III                      |                          |                        |
| CDC        | <i>Escherichia</i> | <i>coli</i> | O145:NM  | 05-3287            | Human  | USA     | III                      |                          |                        |
| CDC        | <i>Escherichia</i> | <i>coli</i> | O118:H25 | 05-3579            | Human  | USA     | III                      |                          |                        |
| CDC        | <i>Escherichia</i> | <i>coli</i> | O145:NM  | 05-3589            | Human  | USA     | III                      |                          |                        |
| CDC        | <i>Escherichia</i> | <i>coli</i> | O145:NM  | 06-3397            | Human  | USA     | III                      |                          |                        |
| CDC        | <i>Escherichia</i> | <i>coli</i> | O145:NM  | 06-3484            | Human  | USA     | III                      |                          |                        |
| CDC        | <i>Escherichia</i> | <i>coli</i> | O145:NM  | 06-3672            | Human  | USA     | III                      |                          |                        |
| CDC        | <i>Escherichia</i> | <i>coli</i> | O145:H34 | 07-3471            | Human  | USA     | III                      |                          |                        |
| CDC        | <i>Escherichia</i> | <i>coli</i> | O145:NM  | 07-3854            | Human  | USA     | III                      |                          |                        |
| CDC        | <i>Escherichia</i> | <i>coli</i> | O145:H25 | 07-3858            | Human  | USA     | III                      |                          |                        |
| CDC        | <i>Escherichia</i> | <i>coli</i> | O145:NM  | 07-3942            | Human  | USA     | III                      |                          |                        |
| CDC        | <i>Escherichia</i> | <i>coli</i> | 145      | 07-4001            | Human  | USA     | III                      |                          |                        |
| CDC        | <i>Escherichia</i> | <i>coli</i> | O145:H25 | 08-3202            | Human  | USA     | III                      |                          |                        |
| CDC        | <i>Escherichia</i> | <i>coli</i> | O118:H16 | 08-3267            | Human  | USA     | III                      |                          |                        |
| CDC        | <i>Escherichia</i> | <i>coli</i> | O118:NM  | 08-3717            | Human  | USA     | III                      |                          |                        |
| CDC        | <i>Escherichia</i> | <i>coli</i> | O145:NM  | 08-4270            | Human  | USA     | III                      |                          |                        |
| CDC        | <i>Escherichia</i> | <i>coli</i> | O145:NM  | 08-4695            | Human  | USA     | III                      |                          |                        |
| CDC        | <i>Escherichia</i> | <i>coli</i> | O145:H28 | 2009C-3292         | Human  | USA     | III                      |                          |                        |
| CDC        | <i>Escherichia</i> | <i>coli</i> | O145:NM  | 2009C-3620         | Human  | USA     | III                      |                          |                        |
| CDC        | <i>Escherichia</i> | <i>coli</i> | O145:NM  | 2009C-3691         | Human  | USA     | III                      |                          |                        |
| CDC        | <i>Escherichia</i> | <i>coli</i> | O145:NM  | 2009C-3770         | Human  | USA     | III                      |                          |                        |
| CDC        | <i>Escherichia</i> | <i>coli</i> | O118:H16 | 2009C-4467         | Human  | USA     | III                      |                          |                        |
| CDC        | <i>Escherichia</i> | <i>coli</i> | O145:NM  | 2010C-3232         | Human  | USA     | III                      |                          |                        |
| CDC        | <i>Escherichia</i> | <i>coli</i> | O145:NM  | 2010C-4243 C1      | Human  | USA     | III                      |                          |                        |
| CDC        | <i>Escherichia</i> | <i>coli</i> | O145:NM  | 2010C-4557 C2      | Human  | USA     | III                      |                          |                        |
| CDC        | <i>Escherichia</i> | <i>coli</i> | O145:H34 | 2010C-4848         | Human  | USA     | III                      |                          |                        |
| CDC        | <i>Escherichia</i> | <i>coli</i> | O145:NM  | 2011C-3160         | Human  | USA     | III                      |                          |                        |
| CDC        | <i>Escherichia</i> | <i>coli</i> | O145:NM  | 2011C-3330         | Human  | USA     | III                      |                          |                        |

<sup>a</sup>Application: I=sequenced; II=sequenced and PFGE ; III= MALDI-TOF

<sup>b</sup>References :

- 1 Bono, J. L., J. E. Keen, L. C. Miller, J. M. Fox, C. G. Chitko-McKown, M. P. Heaton, and W. W. Laegreid. 2004. Evaluation of a real-time PCR kit for detecting *Escherichia coli* O157 in bovine fecal samples. *Appl. Environ. Microbiol.* **70**:1855-7.
- 2 Clawson, M. L., J. E. Keen, T. P. Smith, L. M. Durso, T. G. McDanel, R. E. Mandrell, M.A. Davis, and J. L. Bono. 2009. Phylogenetic classification of *Escherichia coli* O157:H7 strains of human and bovine origin using a novel set of nucleotide polymorphisms. *Genome Biol.* **10**:R56.
- 3 Cooley, M., D. Carychao, L. Crawford-Miksza, M. T. Jay, C. Myers, C. Rose, C. Keys, J. Farrar, and R. E. Mandrell. 2007. Incidence and tracking of *Escherichia coli* O157:H7 in a major produce production region in California. *PLoS One* **2**:e1159.
- 4 Durso, L. M., J. L. Bono, and J. E. Keen. 2005. Molecular serotyping of *Escherichia coli* O26:H11. *Appl. Environ. Microbiol.* **71**:4941-4.
- 5 Durso, L. M., J. L. Bono, and J. E. Keen. 2007. Molecular serotyping of *Escherichia coli* O111:H8. *J. Microbiol. Methods* **69**:381-3.
- 6 Elder, R. O., J. E. Keen, G. R. Siragusa, G. A. Barkocy-Gallagher, M. Koohmaraie, and W. W. Laegreid. 2000. Correlation of enterohemorrhagic *Escherichia coli* O157 prevalence

Supplemental Table 1. Bacterial strains used for sequencing and MALDI-TOF validation

| Collection | Genus                                                                                                                                                                                                                                                               | Species | Serotype | Strain Designation | Source | Country | Application <sup>a</sup> | Genbank accession number | Reference <sup>b</sup>                                                                                                                                                                                                                                                            |
|------------|---------------------------------------------------------------------------------------------------------------------------------------------------------------------------------------------------------------------------------------------------------------------|---------|----------|--------------------|--------|---------|--------------------------|--------------------------|-----------------------------------------------------------------------------------------------------------------------------------------------------------------------------------------------------------------------------------------------------------------------------------|
|            |                                                                                                                                                                                                                                                                     |         |          |                    |        |         |                          |                          | in feces, hides, and carcasses of beef cattle during processing. Proc. Natl. Acad. Sci. U.S.A. 97:2999-3003.                                                                                                                                                                      |
| 7          | Hayashi, T., K. Makino, M. Ohnishi, K. Kurokawa, K. Ishii, K. Yokoyama, C. G. Han, E. Ohtsubo, K. Nakayama, T. Murata, M. Tanaka, T. Tobe, T. Iida, H. Takami, T. Honda, C. Sasakawa, N. Ogasawara, T. Yasunaga, S. Kuhara, T. Shiba, M. Hattori, and H. Shinagawa. |         |          |                    |        |         |                          |                          | 2001. Complete genome sequence of enterohemorrhagic <i>Escherichia coli</i> O157:H7 and genomic comparison with a laboratory strain K-12. DNA Res. 8:11-22.                                                                                                                       |
| 8          | Keen, J. E., T. E. Wittum, J. R. Dunn, J. L. Bono, and L. M. Durso.                                                                                                                                                                                                 |         |          |                    |        |         |                          |                          | 2006. Shiga-toxigenic <i>Escherichia coli</i> O157 in agricultural fair livestock, United States. Emerg. Infect. Dis. 12:780-6.                                                                                                                                                   |
| 9          | Ochman, H., and R. K. Selander.                                                                                                                                                                                                                                     |         |          |                    |        |         |                          |                          | 1984. Standard reference strains of <i>Escherichia coli</i> from natural populations. J. Bacteriol. 157:690-3.                                                                                                                                                                    |
| 10         | Whittam, T. S.                                                                                                                                                                                                                                                      |         |          |                    |        |         |                          |                          | 1998. Evolution of <i>Escherichia coli</i> O157:H7 and other Shiga toxin-producing <i>E. coli</i> strains, p. 195-209. In J. B. Kaper and A.D. O'Brien (ed.), <i>Escherichia coli</i> O157:H7 and other Shiga toxin-producing <i>E. coli</i> strains. ASM Press, Washington, D.C. |
| 11         | Whittam, T. S., M. L. Wolfe, I. K. Wachsmuth, F. Orskov, I. Orskov, and R. A. Wilson.                                                                                                                                                                               |         |          |                    |        |         |                          |                          | 1993. Clonal relationships among <i>Escherichia coli</i> strains that cause hemorrhagic colitis and infantile diarrhea. Infect. Immun. 61:1619-29.                                                                                                                                |

<sup>a</sup>Not Applicable

**Supplemental Table 2. Primers and probes used for sequencing and genotyping**

| <b>Primer name</b> | <b>Primer Sequence (5' - 3')</b> | <b>Application</b>      |
|--------------------|----------------------------------|-------------------------|
| AY763106:80U20     | AGATACTTGTTACTGGTGCC             | O26 O operon sequencing |
| AY763106:353U20    | CTGCGGCATTTATTGAAACC             | O26 O operon sequencing |
| AY763106:667U20    | TACGGCCCTTATCACTTTCC             | O26 O operon sequencing |
| AY763106:981U20    | CCGTTATGCGATTGATGCTG             | O26 O operon sequencing |
| AY763106:1283U20   | TAATCCTGAAGGTGTAGCTG             | O26 O operon sequencing |
| AY763106:1580U20   | GGAATATTGCGCAAAGCATC             | O26 O operon sequencing |
| AY763106:1884U20   | GCACTCAACAAGCTCAACGC             | O26 O operon sequencing |
| AY763106:2156U24   | GGTACTCGTCTTTATCCTGTAAC          | O26 O operon sequencing |
| AY763106:2476U21   | CGAAGTTAATGGATGTCGCTG            | O26 O operon sequencing |
| AY763106:2781U20   | TATGCATGGCTGGACACGGG             | O26 O operon sequencing |
| AY763106:3063U20   | TGAGCGTGGTTTTCTTTATGG            | O26 O operon sequencing |
| AY763106:3366U22   | GGTGTTAAGCGAGATAGCAGAG           | O26 O operon sequencing |
| AY763106:3689U20   | TGTTGGTGAAGTACTAGCAC             | O26 O operon sequencing |
| AY763106:3969U20   | AACAATAGGCCATTGGCTGT             | O26 O operon sequencing |
| AY763106:4293U20   | TCTGTACGCGACGGCAGAGA             | O26 O operon sequencing |
| AY763106:4586U24   | GGGGATATACAATTTTATGTTTGG         | O26 O operon sequencing |
| AY763106:4888U23   | TGTGATGGTTTTAGTTTTATGGA          | O26 O operon sequencing |
| AY763106:5195U20   | CTGCTTTACATGTTGTGTCC             | O26 O operon sequencing |
| AY763106:5487U20   | ACACTAGGACGTTACATGCA             | O26 O operon sequencing |
| AY763106:5798U20   | TCATATTTACTGTTATTCAC             | O26 O operon sequencing |
| AY763106:6100U20   | GAATTTGGGATATTTTGGCG             | O26 O operon sequencing |
| AY763106:6371U20   | TTAACGTGGGGAAGCAGGTT             | O26 O operon sequencing |
| AY763106:6700U20   | GTAAAAGGTGAAAATATGTT             | O26 O operon sequencing |
| AY763106:6996U20   | GGAGGCGGTTAAGACAAATG             | O26 O operon sequencing |
| AY763106:7302U20   | TCGTTTCATGATGACGCTTG             | O26 O operon sequencing |
| AY763106:7604U20   | ATGGTGACCGTCGTATCTCG             | O26 O operon sequencing |
| AY763106:7877U21   | GGACTTAAGCAGGCAGATTTTC           | O26 O operon sequencing |
| AY763106:8204U20   | CGCATTGCAAATGATGAAGC             | O26 O operon sequencing |
| AY763106:8485U21   | GTTTGCGTATACGGTTCCTTC            | O26 O operon sequencing |
| AY763106:8782U21   | GCTAGTTGTTATGCTTTGGGC            | O26 O operon sequencing |
| AY763106:9110U20   | AGGAAAAACCAGAAGCCATG             | O26 O operon sequencing |
| AY763106:9410U20   | CCGATGTACTTTCTCGCCTG             | O26 O operon sequencing |
| AY763106:9698U22   | GCGGGACTATTACAGAGGAGTC           | O26 O operon sequencing |
| AY763106:10011U20  | TATTTGCCCCATAGCACACG             | O26 O operon sequencing |
| AY763106:10311U20  | TTTTGGGGAGGCTTGGTTAA             | O26 O operon sequencing |
| AY763106:10589U24  | CGGCGATGATTATCATTCACTTCG         | O26 O operon sequencing |
| AY763106:10896U20  | TCTTCACATAATTTCCCCGG             | O26 O operon sequencing |
| AY763106:11214U20  | AACTTTTTCGCACTGCAGCA             | O26 O operon sequencing |
| AY763106:11508U20  | TGTCACCAAAAAGCCCTTATG            | O26 O operon sequencing |
| AY763106:11630L22  | GCTAAGATGGTAACCCAGCATG           | O26 O operon sequencing |
| AY763106:11266L20  | TCTCCTGATGAGATGCGTGC             | O26 O operon sequencing |
| AY763106:10934L20  | GGATCGGGATTGATTGAACC             | O26 O operon sequencing |
| AY763106:10557L20  | GTCATTGAGGCCCAATTACG             | O26 O operon sequencing |
| AY763106:10224L22  | GCCATGCACGAAAAGATAAAAG           | O26 O operon sequencing |
| AY763106:9855L20   | AGCGTACTTCTCCACGAGGC             | O26 O operon sequencing |
| AY763106:9511L24   | AGCCACGGTATTAAGTATATTTGC         | O26 O operon sequencing |
| AY763106:9163L20   | CGACGCTTTGCTGGTATTGC             | O26 O operon sequencing |
| AY763106:8819L24   | CGCTATAGTATCTGGTTCAGAACG         | O26 O operon sequencing |
| AY763106:8477L22   | CCGTATACGCAAAGTGTAGG             | O26 O operon sequencing |
| AY763106:8102L20   | TTAGCGTTTTGTCGTTTCCCC            | O26 O operon sequencing |

**Supplemental Table 2. Primers and probes used for sequencing and genotyping**

| <b>Primer name</b> | <b>Primer Sequence (5' - 3')</b> | <b>Application</b>      |
|--------------------|----------------------------------|-------------------------|
| AY763106:7770L20   | ACCGATAAACCCCTGCAGCGC            | O26 O operon sequencing |
| AY763106:7396L20   | AATGTTTGAATTGTTGCCGC             | O26 O operon sequencing |
| AY763106:7052L20   | CACGCGTTTAATCCCATTTCG            | O26 O operon sequencing |
| AY763106:6698L20   | CATATTTTCACCTTTTACAG             | O26 O operon sequencing |
| AY763106:6368L20   | CTGCTTCCCCACGTAAAAAC             | O26 O operon sequencing |
| AY763106:6016L20   | GCTCTTGCTCATTAGAACAG             | O26 O operon sequencing |
| AY763106:5649L22   | ACGGAAAGAAATAACATTAGCG           | O26 O operon sequencing |
| AY763106:5312L23   | GGTGCCATAAAGACAAAACAAAG          | O26 O operon sequencing |
| AY763106:4942L20   | CAATTACCAAATTACTTAGC             | O26 O operon sequencing |
| AY763106:4608L20   | ATGGACAATCCAACCGAACC             | O26 O operon sequencing |
| AY763106:4264L20   | AACAGGCGAAGCAAGAGTGC             | O26 O operon sequencing |
| AY763106:3886L20   | TCCCAAGTATACACTTAATG             | O26 O operon sequencing |
| AY763106:3535L30   | TTTTTTCAACATCAATAGTC             | O26 O operon sequencing |
| AY763106:3183L20   | AGGGTTCCAGCTGATAGTGC             | O26 O operon sequencing |
| AY763106:2847L20   | TTCAGCCCCTGACGTTCTTC             | O26 O operon sequencing |
| AY763106:2486L20   | CTTTGTTAACAGCGACATCC             | O26 O operon sequencing |
| AY763106:2148L20   | AGACGAGTACCCGAACCACC             | O26 O operon sequencing |
| AY763106:1779L20   | TACAAGCCTGCGACTTCTGG             | O26 O operon sequencing |
| AY763106:1445L20   | AATGAATAAGCCAGGCGCCG             | O26 O operon sequencing |
| AY763106:1094L22   | CCACTTTTCACATTTTCGACCC           | O26 O operon sequencing |
| AY763106:749L20    | GCGAATTTGATCCCCTTTGC             | O26 O operon sequencing |
| AY763106:393L20    | TGCGAGCGGCTTCCAAAAGG             | O26 O operon sequencing |
| AY763106:31L20     | CATGCTGTGAAATAAGCGGC             | O26 O operon sequencing |
| AY771223:69U20     | TTCAGAACGCCAGTATCCAG             | O45 O operon sequencing |
| AY771223:427U20    | TTATGTGCTTCTGGAAGCCG             | O45 O operon sequencing |
| AY771223:761U20    | CTGGACGGTAAAGTTTTTGCC            | O45 O operon sequencing |
| AY771223:1126U20   | TACAGAATGGGTGGAAAACG             | O45 O operon sequencing |
| AY771223:1477U20   | AAAGCCGAAGATACGCTGAC             | O45 O operon sequencing |
| AY771223:1811U20   | TGCCACTGCCTTTTAAATCG             | O45 O operon sequencing |
| AY771223:2179U20   | ATTGAAGGTAACAATAATG              | O45 O operon sequencing |
| AY771223:2512U20   | TCATCGCTGCAGCTATAGGG             | O45 O operon sequencing |
| AY771223:2863U20   | TCACCATTGGGCTGATGATC             | O45 O operon sequencing |
| AY771223:3239U20   | TCTGATCATTGTTGGAGCTG             | O45 O operon sequencing |
| AY771223:3577U22   | CAAACCTCAGCTCTTGGTGTAGG          | O45 O operon sequencing |
| AY771223:3935U20   | CGTATTGATTCAATGACGCC             | O45 O operon sequencing |
| AY771223:4291U20   | GTTACTTCCTGCGCTAAGCC             | O45 O operon sequencing |
| AY771223:4613U20   | GATCCTGTTACCCCGATCCC             | O45 O operon sequencing |
| AY771223:4991U20   | TTATGTTGTGCCCAAGCTGC             | O45 O operon sequencing |
| AY771223:5326U24   | TGGGGATGTTTTCGTATTGG             | O45 O operon sequencing |
| AY771223:5686U24   | TGACTTACTTTGGAAAGAACACAA         | O45 O operon sequencing |
| AY771223:6037U20   | GATGTTGCAGTGGATTTGCG             | O45 O operon sequencing |
| AY771223:6398U20   | TTTGGCTAAGGGTGAGGATG             | O45 O operon sequencing |
| AY771223:6723U23   | CGAGATACGATTATTGTCAGACC          | O45 O operon sequencing |
| AY771223:7100U20   | AGATATAGAAATAATGATTG             | O45 O operon sequencing |
| AY771223:7448U20   | GTCTGGCTGCAGGGACTTTC             | O45 O operon sequencing |
| AY771223:7771U22   | GGGTTTCGATTTGTGAAGGTTG           | O45 O operon sequencing |
| AY771223:8131U21   | GGTGAAAAGCTTGTTAATGCC            | O45 O operon sequencing |
| AY771223:8504U20   | TTAATTCTTATTGACGATTG             | O45 O operon sequencing |
| AY771223:8836U20   | AGCGCGTAATATCCCTGAAG             | O45 O operon sequencing |
| AY771223:9180U20   | GACTCCGCAGTAAATTACTC             | O45 O operon sequencing |

**Supplemental Table 2. Primers and probes used for sequencing and genotyping**

| <b>Primer name</b> | <b>Primer Sequence (5' - 3')</b> | <b>Application</b>      |
|--------------------|----------------------------------|-------------------------|
| AY771223:9548U20   | GACTCCGCAGTAAATTACTC             | O45 O operon sequencing |
| AY771223:9904U20   | AAAAATTCACATAAAAAGATG            | O45 O operon sequencing |
| AY771223:10259U20  | AAAGCTAATGCCCGATCTTG             | O45 O operon sequencing |
| AY771223:10605U20  | CGGAATGAAAATGACTCCAG             | O45 O operon sequencing |
| AY771223:10956U20  | TGTCGCTGCTAATGCTGTTG             | O45 O operon sequencing |
| AY771223:11281U25  | CAAAGGTGAATCTCTTGATAGAAAA        | O45 O operon sequencing |
| AY771223:11642U23  | CCTTCAATTGTTGTCTTGGTAGG          | O45 O operon sequencing |
| AY771223:11988U23  | CGCGTTATAGTATAGACTCGTGG          | O45 O operon sequencing |
| AY771223:12352U20  | ATGGCCTCGTGCAAGCATTTC            | O45 O operon sequencing |
| AY771223:12713U20  | TCTCGAGCAGGGGAATCTTC             | O45 O operon sequencing |
| AY771223:13067U20  | TTCTGTTACCTTCTGCGTTC             | O45 O operon sequencing |
| AY771223:13402U20  | ACTCAGGAACCTCTTGCAGC             | O45 O operon sequencing |
| AY771223:13769U20  | CATTACCTAGGGAAAACCTG             | O45 O operon sequencing |
| AY771223:14111U22  | GGCTATCTATTTTGGAGCTTGC           | O45 O operon sequencing |
| AY771223:14388L20  | TCCCGGTGGATATATTATCG             | O45 O operon sequencing |
| AY771223:14039L20  | TGAGATAGTCTACTCGCAAC             | O45 O operon sequencing |
| AY771223:13690L20  | TACTGAATGAGGGTATTCCC             | O45 O operon sequencing |
| AY771223:13339L20  | CTTCTGCTACCAAATTTTC              | O45 O operon sequencing |
| AY771223:12983L20  | ATATGATATTGTTAGATAAC             | O45 O operon sequencing |
| AY771223:12658L20  | GCGTGCTGATGGCTTGACAC             | O45 O operon sequencing |
| AY771223:12288L20  | CTGCCATCACCCAGTAAACG             | O45 O operon sequencing |
| AY771223:11957L20  | AGGTGCGCATCGTTATATGG             | O45 O operon sequencing |
| AY771223:11579L20  | TCATAAACCTCTCCCAATAC             | O45 O operon sequencing |
| AY771223:11229L20  | TGTTTGAAGCAAATCTTCTCAA           | O45 O operon sequencing |
| AY771223:10899L20  | TAGCCCCAGATGCAATAACC             | O45 O operon sequencing |
| AY771223:10545L20  | TATTTGCCCCAGTCAGTTTG             | O45 O operon sequencing |
| AY771223:10192L24  | TGGTATCATGGAATCCTAAATCAC         | O45 O operon sequencing |
| AY771223:9829L20   | TCTGAAGACCAGCATTTC               | O45 O operon sequencing |
| AY771223:9473L23   | TTGATAAAAACACCACCATCTCA          | O45 O operon sequencing |
| AY771223:9123L20   | ACTATCCTTCACGCACTCCG             | O45 O operon sequencing |
| AY771223:8772L20   | AAGTCTGGCAGGGTTCGATTC            | O45 O operon sequencing |
| AY771223:8419L20   | GTTCAACAATAGGCAGGGACC            | O45 O operon sequencing |
| AY771223:8073L20   | TAAATAATGCGCCCGTGCAG             | O45 O operon sequencing |
| AY771223:7724L24   | AGATAAAGCCACAAGGTAAAAGTG         | O45 O operon sequencing |
| AY771223:7367L20   | AATTACCATCTCGGCTCCAC             | O45 O operon sequencing |
| AY771223:7029L20   | TCTGTTGGCGGGAAATATTC             | O45 O operon sequencing |
| AY771223:6665L20   | TAAGATTGAAAAGCCTTCGG             | O45 O operon sequencing |
| AY771223:6329L20   | TATAATATGCTTTCATAAAG             | O45 O operon sequencing |
| AY771223:5985L20   | TACCCTGGGGTTTCGTTTTTC            | O45 O operon sequencing |
| AY771223:5609L20   | CCCTCATAATCAAAGTTGCG             | O45 O operon sequencing |
| AY771223:5269L20   | CTGCCTCAGGAATGGTCATG             | O45 O operon sequencing |
| AY771223:4909L20   | TATAAGCAGCCGCATGGTAG             | O45 O operon sequencing |
| AY771223:4556L20   | GCATCGATTCTTGCTTTTCC             | O45 O operon sequencing |
| AY771223:4205L20   | AACATTCTCATTGCAAGGCG             | O45 O operon sequencing |
| AY771223:3860L22   | GCGTTATAATCCGTTTTATTGG           | O45 O operon sequencing |
| AY771223:3504L20   | GGGCTCACAAATGCAAAGG              | O45 O operon sequencing |
| AY771223:3157L20   | CAATGGTAACCAAGCGATGG             | O45 O operon sequencing |
| AY771223:2802L20   | GCCACAGGGAAAGTTCCACAC            | O45 O operon sequencing |
| AY771223:2450L20   | CGTCGAGGAAACCAATAACC             | O45 O operon sequencing |
| AY771223:2111L20   | CGTCCATTGAAGGTGCTCTC             | O45 O operon sequencing |

**Supplemental Table 2. Primers and probes used for sequencing and genotyping**

| <b>Primer name</b> | <b>Primer Sequence (5' - 3')</b> | <b>Application</b>       |
|--------------------|----------------------------------|--------------------------|
| AY771223:1757L20   | GTTACCCGGTGCATTTGGAC             | O45 O operon sequencing  |
| AY771223:1416L21   | GTATCACAACCCTGGAGAAGG            | O45 O operon sequencing  |
| AY771223:1050L20   | CGTCCATCCCAACTCAGCAC             | O45 O operon sequencing  |
| AY771223:706L20    | GGAAATGATACGGGCCATAG             | O45 O operon sequencing  |
| AY771223:349L20    | GACTTTTCAGCCGCCAATGC             | O45 O operon sequencing  |
| AY532664:63U20     | CCGCTTATTTACAGCATGC              | O103 O operon sequencing |
| AY532664:431U20    | GAAGCGGCTCGCAATTAAGT             | O103 O operon sequencing |
| AY532664:781U20    | TAAAGGGGATCAAATTCGCG             | O103 O operon sequencing |
| AY532664:1130U20   | CGACGAGTTCAAGATGGCTC             | O103 O operon sequencing |
| AY532664:1471U25   | GGAAATGACACAGTATGTCTTATGC        | O103 O operon sequencing |
| AY532664:1834U20   | TTTGCATGGCTGGATACAGG             | O103 O operon sequencing |
| AY532664:2180U20   | GTAAGACGGGGATATCACGC             | O103 O operon sequencing |
| AY532664:2524U20   | TGCGGGTAGATTCTCGTCTC             | O103 O operon sequencing |
| AY532664:2880U22   | GGAGCCACCATAATAAAAGAGG           | O103 O operon sequencing |
| AY532664:3223U23   | CGGAGATGAAATTATTGTACCTG          | O103 O operon sequencing |
| AY532664:3580U20   | AGGTGCGATAACAACGAGTG             | O103 O operon sequencing |
| AY532664:3938U20   | GCGCCTCATAATCAAGAAGC             | O103 O operon sequencing |
| AY532664:4292U20   | CAGAAAATCAAGGTGATTAC             | O103 O operon sequencing |
| AY532664:4637U20   | ATAATGCGGTTGCAGGTGTC             | O103 O operon sequencing |
| AY532664:4985U20   | GTATTGTTGTACCGCTCGCG             | O103 O operon sequencing |
| AY532664:5325U20   | GCATCTGACAAAAAGGCC               | O103 O operon sequencing |
| AY532664:5674U22   | GCTCCGATGCTGGATAATAAAG           | O103 O operon sequencing |
| AY532664:6046U20   | TATAAAGTTATAAATAATGC             | O103 O operon sequencing |
| AY532664:6396U20   | ATACTAGAGACATTAGAGTC             | O103 O operon sequencing |
| AY532664:6717U24   | GCAGTGTTTACTTATTTCCAAACC         | O103 O operon sequencing |
| AY532664:7097U20   | TGGTTATTATTTGGCTTACC             | O103 O operon sequencing |
| AY532664:7421U21   | TTTACCTCGTTTGAATTTGGG            | O103 O operon sequencing |
| AY532664:7799U20   | ATCATAATTACGGTATCCTC             | O103 O operon sequencing |
| AY532664:8146U20   | ATTAAATGACAAGACCCCGC             | O103 O operon sequencing |
| AY532664:8492U21   | TTGTCGTGTTGAATGGAAATG            | O103 O operon sequencing |
| AY532664:8850U20   | CAAATCGAAGTCAATTCCCG             | O103 O operon sequencing |
| AY532664:9205U20   | GGCTTTGGTTTGGTTGTAGC             | O103 O operon sequencing |
| AY532664:9554U20   | GTTAAAATAAAATTCGGTG              | O103 O operon sequencing |
| AY532664:9907U20   | ATCCTGATTCTGTTCTTTGC             | O103 O operon sequencing |
| AY532664:10254U20  | CATTTTGGTATGGTGGCAAG             | O103 O operon sequencing |
| AY532664:10581U23  | TGTCGAGAAACAGTAATTGATGG          | O103 O operon sequencing |
| AY532664:10959U20  | CATAATTCCTCAGTTGAATC             | O103 O operon sequencing |
| AY532664:112881U22 | TGGCACTACTAATCCCTATGGG           | O103 O operon sequencing |
| AY532664:11661U20  | TCGGTTCTTGAACCTTTGGC             | O103 O operon sequencing |
| AY532664:11964L20  | TGTCAGGGGTTACTGCGAAC             | O103 O operon sequencing |
| AY532664:11593L20  | ATCTCGGTGCTTCAAGGCAG             | O103 O operon sequencing |
| AY532664:11244L22  | CGGGTATCTTCTCTGGAGTACC           | O103 O operon sequencing |
| AY532664:10881L20  | GAGCCAATATATCCAGCACC             | O103 O operon sequencing |
| AY532664:10532L20  | GACCTATTGCCATTGCTTCC             | O103 O operon sequencing |
| AY532664:10188L20  | ACACCTATGCCACCAATAAC             | O103 O operon sequencing |
| AY532664:9835L20   | AGGATTAATACCAGATCGTG             | O103 O operon sequencing |
| AY532664:9477L20   | TATTTTTCCATTAAGCTATG             | O103 O operon sequencing |
| AY532664:9132L24   | GCGACATTAGCAATACTACCTAGC         | O103 O operon sequencing |
| AY532664:8786L20   | TACATTAGTCGTAGCATCAC             | O103 O operon sequencing |
| AY532664:8425L20   | ATTTGTTTTTCAGCCCCACC             | O103 O operon sequencing |

**Supplemental Table 2. Primers and probes used for sequencing and genotyping**

| <b>Primer name</b> | <b>Primer Sequence (5' - 3')</b> | <b>Application</b>       |
|--------------------|----------------------------------|--------------------------|
| AY532664:8079L20   | GCGAGCCAGAAAAGTAATCG             | O103 O operon sequencing |
| AY532664:7736L24   | CGGTAAAATTATTACTGCAGACAC         | O103 O operon sequencing |
| AY532664:7398L20   | CCCCTCATCCTCGATGAATC             | O103 O operon sequencing |
| AY532664:7021L20   | TTTAATGTTATTAAGCGAGG             | O103 O operon sequencing |
| AY532664:6694L25   | GCACCTATATTATCCAAATTTGAGC        | O103 O operon sequencing |
| AY532664:6328L20   | TTTCATATTTAGCTAACAAAG            | O103 O operon sequencing |
| AY532664:5981L20   | AAAGAAATATCTTCCAGATG             | O103 O operon sequencing |
| AY532664:5633L25   | GCATCTGAACTTAAAGAGTCATCAC        | O103 O operon sequencing |
| AY532664:5269L20   | GCATAAGTGATGCTGTAGGC             | O103 O operon sequencing |
| AY532664:4931L20   | ATATCTTCTTGCGGCTGCAG             | O103 O operon sequencing |
| AY532664:4568L20   | GCCCACCATAGATAACAACG             | O103 O operon sequencing |
| AY532664:4212L20   | CAAAATTTTGCAATTGTCCC             | O103 O operon sequencing |
| AY532664:3870L20   | TTGCAAAGAATCACGCTCTG             | O103 O operon sequencing |
| AY532664:3514L20   | CAGCTGCATGACCCCAACTG             | O103 O operon sequencing |
| AY532664:3173L21   | CCGAAGAACAAGGATTAGTGC            | O103 O operon sequencing |
| AY532664:2819L20   | CAACTTGAAAATATGAATAC             | O103 O operon sequencing |
| AY532664:2458L20   | TGTATTTTTGTAAAGAGCG              | O103 O operon sequencing |
| AY532664:2114L24   | AATTGGGATATCTTTATTTTGCTC         | O103 O operon sequencing |
| AY532664:1765L24   | AACTTCATTAAGTCCGTAATTC           | O103 O operon sequencing |
| AY532664:1412L22   | CCATCTGGACTAGGTTGAATTG           | O103 O operon sequencing |
| AY532664:1053L20   | CGTTTCCTGTGGTTTCCATC             | O103 O operon sequencing |
| AY532664:702L20    | TTCCGGGAAATGATACGGAC             | O103 O operon sequencing |
| AY532664:351L20    | ACGATCCACATGGCTTTCAG             | O103 O operon sequencing |
| AF078736:74U20     | CCTGGGGACGTATTCAACTG             | O111 O operon sequencing |
| AF078736:431U20    | TTTTTTCTTGTTTCTGGTCTG            | O111 O operon sequencing |
| AF078736:776U20    | TACTTTTAGAATGTGATATG             | O111 O operon sequencing |
| AF078736:1129U20   | GGAATGATTGAAGGTCTAGG             | O111 O operon sequencing |
| AF078736:1462U25   | ACAACCTATCCAAGTTCTGAATTTG        | O111 O operon sequencing |
| AF078736:1832U20   | AAATGGGGCTTGCTGGAAGG             | O111 O operon sequencing |
| AF078736:2181U20   | GATACTTCCAATCTGACCCG             | O111 O operon sequencing |
| AF078736:2537U20   | TAACCACGAATCACCTCGCC             | O111 O operon sequencing |
| AF078736:2867U20   | TAAAGCTGTAAACCCGGGCG             | O111 O operon sequencing |
| AF078736:3239U20   | GCTAATTGAAAACGAGAATG             | O111 O operon sequencing |
| AF078736:3556U25   | GGCTAACTAAACACCAAATAAATGC        | O111 O operon sequencing |
| AF078736:3930U20   | CCTGCCATAGCTTTAGCTGC             | O111 O operon sequencing |
| AF078736:4277U20   | TCGCGCCAGTAAATATCTTG             | O111 O operon sequencing |
| AF078736:4641U20   | ATTGTCCAAACCAAGGATGC             | O111 O operon sequencing |
| AF078736:4991U20   | TCCAGGCGTAATACCTTTGC             | O111 O operon sequencing |
| AF078736:5331U20   | GAATGTGTGGTACTGAAGAG             | O111 O operon sequencing |
| AF078736:5667U23   | TTATTGATGCTATTGAGGAATGC          | O111 O operon sequencing |
| AF078736:6040U20   | CGGTCATGCTTACATTAAGC             | O111 O operon sequencing |
| AF078736:6390U20   | CAGAACCTGTAGTACGATTG             | O111 O operon sequencing |
| AF078736:6730U20   | CAGGCCGTTTGATTTTCTGG             | O111 O operon sequencing |
| AF078736:7099U20   | CCCAGAGATCGAAATTTGGG             | O111 O operon sequencing |
| AF078736:7450U20   | TACCCACTTGCTAGTAATAC             | O111 O operon sequencing |
| AF078736:7801U20   | AATGCTATTTTCAAGATAAAAC           | O111 O operon sequencing |
| AF078736:8135U23   | GTGATGATATTTTCAAGAGTCG           | O111 O operon sequencing |
| AF078736:8499U20   | TGATACGGTAGCAAATGCCG             | O111 O operon sequencing |
| AF078736:8838U20   | GGATGTTCCGCATGGATTGC             | O111 O operon sequencing |
| AF078736:9200U20   | TTTAGCCTTTACCATTAAG              | O111 O operon sequencing |

**Supplemental Table 2. Primers and probes used for sequencing and genotyping**

| <b>Primer name</b> | <b>Primer Sequence (5' - 3')</b> | <b>Application</b>       |
|--------------------|----------------------------------|--------------------------|
| AF078736:9555U20   | CTAATTTCTGTTTTGCCTTG             | O111 O operon sequencing |
| AF078736:9904U20   | TCTATTGATTTACTTTTTTC             | O111 O operon sequencing |
| AF078736:10259U20  | TGTTTTACTTGTTTAGATTG             | O111 O operon sequencing |
| AF078736:10584U20  | TTTGGTTTTACAGCTTGGTG             | O111 O operon sequencing |
| AF078736:10961U20  | TGTAATGGAAATTTAGACGC             | O111 O operon sequencing |
| AF078736:11299U20  | ATCTAATGGCGCCCCTGTGG             | O111 O operon sequencing |
| AF078736:11646U23  | CGCTAGAAAAGTTTCATTGTACGC         | O111 O operon sequencing |
| AF078736:11990U20  | TGGATAAAAATTTTAGAAGC             | O111 O operon sequencing |
| AF078736:12343U20  | AGAAAGAAAACGCGAGATGC             | O111 O operon sequencing |
| AF078736:12702U20  | TGCTACCGATTCTGGTGGAG             | O111 O operon sequencing |
| AF078736:13066U20  | AGACTACATTCAAGCCGCGC             | O111 O operon sequencing |
| AF078736:13413U20  | TTATTGATGGTGGCAACACC             | O111 O operon sequencing |
| AF078736:13767U20  | TGGCAACCACTTTTACCGAG             | O111 O operon sequencing |
| AF078736:14119U20  | TTATGCCCAAGGCTTCTCTC             | O111 O operon sequencing |
| AF078736:14468U20  | GGTGCGCACACGTATAAACG             | O111 O operon sequencing |
| AF078736:14425L20  | TCAGATTAGCCGGCAGTACC             | O111 O operon sequencing |
| AF078736:14074L20  | CGCGACGGACTTTCTCAACG             | O111 O operon sequencing |
| AF078736:13730L20  | TTAAGGCCGCCTTTAAGCAG             | O111 O operon sequencing |
| AF078736:13367L20  | TTCAGGGAATCGATAGCAGC             | O111 O operon sequencing |
| AF078736:13020L20  | GATATATAACAAAATCCAGC             | O111 O operon sequencing |
| AF078736:12663L20  | CCATAGCTTCTGCAACAACG             | O111 O operon sequencing |
| AF078736:12340L20  | TCTCGCGTTTTCTTTCTGAC             | O111 O operon sequencing |
| AF078736:11960L20  | ATGAATATTAATATTTTGTG             | O111 O operon sequencing |
| AF078736:11609L20  | GAAATATCAGTCGAAACCCC             | O111 O operon sequencing |
| AF078736:11277L21  | CCATAACCCCTTCATCAATG             | O111 O operon sequencing |
| AF078736:10907L20  | AACTCCAAGTGAAGCCCGC              | O111 O operon sequencing |
| AF078736:10558L20  | ATCATCCCCGTACGTTCAAT             | O111 O operon sequencing |
| AF078736:10218L24  | AAAGGAAATGAGCTAAACTTATCG         | O111 O operon sequencing |
| AF078736:9863L20   | AGACAAAAGCTACATAAAGG             | O111 O operon sequencing |
| AF078736:9504L20   | GAGGGAAATGTGTTAGATGC             | O111 O operon sequencing |
| AF078736:9165L20   | AGTGCATTTCCGTAAATGCC             | O111 O operon sequencing |
| AF078736:8825L23   | CGGAACATCCTCCACATATTAAC          | O111 O operon sequencing |
| AF078736:8464L25   | AATCAAATAACTCAAACACGTTCC         | O111 O operon sequencing |
| AF078736:8110L20   | GTGCCTGTAACCATATTCTC             | O111 O operon sequencing |
| AF078736:7749L20   | CTTTATTGATATCGACAAAC             | O111 O operon sequencing |
| AF078736:7397L20   | TTATAGGTCTTTCTGATGCC             | O111 O operon sequencing |
| AF078736:7055L22   | GGATTTTTTTTATAACTGCCGG           | O111 O operon sequencing |
| AF078736:6697L20   | GAATGCCTCCAATAATCCC              | O111 O operon sequencing |
| AF078736:6349L20   | AACGCCAATCAGAGAACTCC             | O111 O operon sequencing |
| AF078736:6001L20   | TACCACCATGACTTTCTACG             | O111 O operon sequencing |
| AF078736:5647L20   | CAGGACCAGCTGCACCATTCC            | O111 O operon sequencing |
| AF078736:5296L20   | TTACGCCTGCATCACATAGC             | O111 O operon sequencing |
| AF078736:4961L21   | CTATATTTTGTCCCTGAGGG             | O111 O operon sequencing |
| AF078736:4597L20   | CGCAACCAGACTTGACTCAG             | O111 O operon sequencing |
| AF078736:4253L21   | AAAAACATTCCGCTATTCCAG            | O111 O operon sequencing |
| AF078736:3908L20   | CAGTATTACGGCCTTTCCGGC            | O111 O operon sequencing |
| AF078736:3543L20   | GTTAGCCAAAGGTATTCACG             | O111 O operon sequencing |
| AF078736:3201L20   | GGAACAACTTGATAATTTCC             | O111 O operon sequencing |
| AF078736:2835L20   | TTGACCGAAACAACAACACC             | O111 O operon sequencing |
| AF078736:2508L20   | CCATTGCAGGCAAACATACC             | O111 O operon sequencing |

**Supplemental Table 2. Primers and probes used for sequencing and genotyping**

| <b>Primer name</b> | <b>Primer Sequence (5' - 3')</b> | <b>Application</b>       |
|--------------------|----------------------------------|--------------------------|
| AF078736:2160L20   | GTCAAATCGCCATAGTGTAG             | O111 O operon sequencing |
| AF078736:1783L20   | TATTTTCATTTTTCTGCCAG             | O111 O operon sequencing |
| AF078736:1445L20   | TGTCTTAACGAACTTTGCGG             | O111 O operon sequencing |
| AF078736:1104L20   | TCCTTGGCACTTTTGACAAC             | O111 O operon sequencing |
| AF078736:731L20    | GCATAGTAACATCAACTGCC             | O111 O operon sequencing |
| AF078736:401L24    | AAAAAGCAGATTAACCTTGGTAGG         | O111 O operon sequencing |
| AF078736:34L21     | CAACTCAGCCCAGATATCAGC            | O111 O operon sequencing |
| AY208937:77U20     | GGCTATTTAAGCGCTACATG             | O121 O operon sequencing |
| AY208937:402U22    | ACGGTACCTACTCCAATTGATG           | O121 O operon sequencing |
| AY208937:782U20    | GATTGAGAACACCCAGCGTG             | O121 O operon sequencing |
| AY208937:1131U20   | GAAAACGTCCGGATCTTCG              | O121 O operon sequencing |
| AY208937:1482U20   | AAAATAGAAGACGCTTTGTC             | O121 O operon sequencing |
| AY208937:1831U20   | TTAATATGTTGGTTGCCGCC             | O121 O operon sequencing |
| AY208937:2178U21   | ATTGAGAATGTCGTGCAAATG            | O121 O operon sequencing |
| AY208937:2527U20   | TGGTTTTATTGGGTCAGCTG             | O121 O operon sequencing |
| AY208937:2877U24   | TTATTTTTCATCATGTTTCGACAG         | O121 O operon sequencing |
| AY208937:3223U22   | GGCACTTCATCTTGTCATCAGC           | O121 O operon sequencing |
| AY208937:3587U20   | TGAAAGGAATAATCCTCGCC             | O121 O operon sequencing |
| AY208937:3937U20   | CCAAAACCTCAAAGAGGCTGC            | O121 O operon sequencing |
| AY208937:4267U20   | CAAAGCATGTTGGAAGCATC             | O121 O operon sequencing |
| AY208937:4643U20   | GCTTATAACCGCAGTACAGG             | O121 O operon sequencing |
| AY208937:4964U20   | TCGCCATGGAGATCTAAGTG             | O121 O operon sequencing |
| AY208937:5327U20   | TCCGTTATCTCGTGATGAAC             | O121 O operon sequencing |
| AY208937:5696U20   | GGATCTGCATATAGTTTTAC             | O121 O operon sequencing |
| AY208937:6043U20   | TGCAAGTGGTGGACAAAATC             | O121 O operon sequencing |
| AY208937:6385U25   | CAATAATTTCAATCAGAGAGAATGG        | O121 O operon sequencing |
| AY208937:6749U20   | TCAGTGCTGTCGGGATTTTA             | O121 O operon sequencing |
| AY208937:7100U20   | CATTACGATGGATAGGTGGG             | O121 O operon sequencing |
| AY208937:7449U20   | CATCTTGTCGGGTATATTGG             | O121 O operon sequencing |
| AY208937:7799U20   | TACAATATGCTCAAGGGCGG             | O121 O operon sequencing |
| AY208937:8135U23   | TGGTTTCAATAGTATCATGCTGG          | O121 O operon sequencing |
| AY208937:8504U20   | TAAATTAAGTTTACAAGCAC             | O121 O operon sequencing |
| AY208937:8853U20   | AAAACCTCGCATTGCTCTTCG            | O121 O operon sequencing |
| AY208937:9189U20   | TCATGATACGCTTAGGGCAG             | O121 O operon sequencing |
| AY208937:9557U20   | CCAGATTCTGTTGCTGTTGG             | O121 O operon sequencing |
| AY208937:9880U20   | GGGGAAGGGCGTTACTTATC             | O121 O operon sequencing |
| AY208937:10247U20  | GAAATGGGCAATGAGGACCG             | O121 O operon sequencing |
| AY208937:1060920   | TTTTTGCCTTTTATATAATG             | O121 O operon sequencing |
| AY208937:10931U23  | GACCAGATGGTACAGGAATATGG          | O121 O operon sequencing |
| AY208937:11301U20  | GTA CTGGGGATGGCAAGATG            | O121 O operon sequencing |
| AY208937:11662U20  | CTTGGCGCTTTTCTTAGTGG             | O121 O operon sequencing |
| AY208937:12007U20  | ACGCCATATAGCTTTACGCC             | O121 O operon sequencing |
| AY208937:12365U20  | AAACCCGAGTGCCATTATTG             | O121 O operon sequencing |
| AY208937:12698U24  | TGTTTCAATCATGGTTAGAAAACC         | O121 O operon sequencing |
| AY208937:13054U20  | GGTGTGTTAGAAGTACTGAC             | O121 O operon sequencing |
| AY208937:13417U20  | TATTAGTCGGTCGTGGCTTG             | O121 O operon sequencing |
| AY208937:13769U20  | AAGGCTGCGAATTGAGAATG             | O121 O operon sequencing |
| AY208937:14091U21  | GACCTTGTCCATCTTGTCACG            | O121 O operon sequencing |
| AY208937:14468U20  | TGAGTTTATCGAAGCCGCTC             | O121 O operon sequencing |
| AY208937:14815U20  | CGTTAGCAGATGCGATTGAG             | O121 O operon sequencing |

**Supplemental Table 2. Primers and probes used for sequencing and genotyping**

| <b>Primer name</b> | <b>Primer Sequence (5' - 3')</b> | <b>Application</b>       |
|--------------------|----------------------------------|--------------------------|
| AY208937:15056L20  | GCGGCTTGAATGTATTGAAG             | O121 O operon sequencing |
| AY208937:14713L20  | AACTGCCCTACCACACGCTG             | O121 O operon sequencing |
| AY208937:14356L20  | CCCCGAACCTCTGATCAGAC             | O121 O operon sequencing |
| AY208937:14004L20  | CCTCCTCTGGAAAGAAAGAG             | O121 O operon sequencing |
| AY208937:13674L20  | GAGTTTCCGGCTGGAACAAC             | O121 O operon sequencing |
| AY208937:13317L21  | GCGACCAACTGAACATACCAC            | O121 O operon sequencing |
| AY208937:12969L22  | TCCAGGTATGAACAACATCAGG           | O121 O operon sequencing |
| AY208937:12622L20  | CAGCAACTTCTCACAGCAGC             | O121 O operon sequencing |
| AY208937:12255L20  | CATATCCGCCATTTACAGGG             | O121 O operon sequencing |
| AY208937:11901L20  | GCAACTGAGAACTATCAGCG             | O121 O operon sequencing |
| AY208937:11568L21  | GGTGATCCCATGAAAGGATTC            | O121 O operon sequencing |
| AY208937:11202L20  | CAACACATGCCTGCAATGTC             | O121 O operon sequencing |
| AY208937:10850L23  | TAAATTTGATTCAAGGAAACCAG          | O121 O operon sequencing |
| AY208937:10496L20  | GATAAAAGCTGAGCTTATAC             | O121 O operon sequencing |
| AY208937:10168L24  | CCAAAAAAGTTTTTAGTGAGATCC         | O121 O operon sequencing |
| AY208937:9792L20   | AAAATAAGACAGATAGCTTG             | O121 O operon sequencing |
| AY208937:9440L20   | TTATCACCCACTACTGGTTG             | O121 O operon sequencing |
| AY208937:9097L20   | CATGTAAGTCCTCGTTAACG             | O121 O operon sequencing |
| AY208937:8738L20   | TAACGAGGTAGTCAACGAGC             | O121 O operon sequencing |
| AY208937:8400L21   | AACCCCAAGATTCTTTTCATG            | O121 O operon sequencing |
| AY208937:8060L21   | CGCTAAATCGGACAATAAAGG            | O121 O operon sequencing |
| AY208937:7698L20   | CTTCTGCATCACCAGTCCAG             | O121 O operon sequencing |
| AY208937:7364L21   | GCATCAGTGACATAATAGGCG            | O121 O operon sequencing |
| AY208937:7005L20   | CCGAAATGATGGGTGCTAAG             | O121 O operon sequencing |
| AY208937:6634L20   | CTCAGATTCTGATAATATTG             | O121 O operon sequencing |
| AY208937:6299L24   | CATTTTCAGGTTTAGATCATCTTGG        | O121 O operon sequencing |
| AY208937:5948L20   | TCAMTATTACTTGAGAAGAC             | O121 O operon sequencing |
| AY208937:5602L20   | CTGATGCCGTGATCAATTGG             | O121 O operon sequencing |
| AY208937:5257L20   | GCCGCTGGGAATTACTATGC             | O121 O operon sequencing |
| AY208937:4907L20   | GCGCAGCATCATAAATGACC             | O121 O operon sequencing |
| AY208937:4549L22   | TGATGCATTGGACCATTATTTG           | O121 O operon sequencing |
| AY208937:4192L20   | TTCCCATTGCGAAGATAGAC             | O121 O operon sequencing |
| AY208937:3833L20   | AGCCTGTGCTAACCCCTTCAG            | O121 O operon sequencing |
| AY208937:3475L20   | CTGTTTTTCTAATACCAGAC             | O121 O operon sequencing |
| AY208937:3133L20   | CTTGCAGCGCATTAAAGGATC            | O121 O operon sequencing |
| AY208937:2774L20   | TGTATAAACTCAAACGGGCC             | O121 O operon sequencing |
| AY208937:2427L21   | GCCCTCCGATATACTGAACTG            | O121 O operon sequencing |
| AY208937:2071L20   | AGCAGCATATGCCCCATTAG             | O121 O operon sequencing |
| AY208937:1737L23   | GCCTGATGTAGGACATGATCAAC          | O121 O operon sequencing |
| AY208937:1374L20   | TTCAAATCATAAATAACACC             | O121 O operon sequencing |
| AY208937:1018L20   | ACTCATTCCATCATTAAATTC            | O121 O operon sequencing |
| AY208937:682L20    | AATCTCAGCAATTTTCAGGCG            | O121 O operon sequencing |
| AY208937:319L20    | TTGAGCCAGTTCATCAGAAC             | O121 O operon sequencing |
| AY763106:80U20     | AGATACTTGTTACTGGTGCC             | O145 O operon sequencing |
| AY763106:353U20    | CTGCGGCATTTATTGAAACC             | O145 O operon sequencing |
| AY763106:667U20    | TACGGCCCTTATCACTTTCC             | O145 O operon sequencing |
| AY763106:981U20    | CCGTTATGCGATTGATGCTG             | O145 O operon sequencing |
| AY763106:1283U20   | TAATCCTGAAGGTGTAGCTG             | O145 O operon sequencing |
| AY763106:1580U20   | GGAATATTGCGCAAAGCATC             | O145 O operon sequencing |
| AY763106:1884U20   | GCACTCAACAAGCTCAACGC             | O145 O operon sequencing |

**Supplemental Table 2. Primers and probes used for sequencing and genotyping**

| <b>Primer name</b> | <b>Primer Sequence (5' - 3')</b> | <b>Application</b>       |
|--------------------|----------------------------------|--------------------------|
| AY763106:2156U24   | GGTACTCGTCTTTATCCTGTAAC          | O145 O operon sequencing |
| AY763106:2476U21   | CGAAGTTAATGGATGTCGCTG            | O145 O operon sequencing |
| AY763106:2781U20   | TATGCATGGCTGGACACGGG             | O145 O operon sequencing |
| AY763106:3063U20   | TGAGCGTGGTTTTCTTTATGG            | O145 O operon sequencing |
| AY763106:3366U22   | GGTGTTAAGCGAGATAGCAGAG           | O145 O operon sequencing |
| AY763106:3689U20   | TGTTGGTGAAGTACTAGCAC             | O145 O operon sequencing |
| AY763106:3969U20   | AACAATAGGCCATTGGCTGT             | O145 O operon sequencing |
| AY763106:4293U20   | TCTGTACGCGACGGCAGAGA             | O145 O operon sequencing |
| AY763106:4586U24   | GGGGATATACAATTTTATGTTTGG         | O145 O operon sequencing |
| AY763106:4888U23   | TGTGATGGTTTTAGTTTTATGGA          | O145 O operon sequencing |
| AY763106:5195U20   | CTGCTTTACATGTTGTGTCC             | O145 O operon sequencing |
| AY763106:5487U20   | ACACTAGGACGTTACATGCA             | O145 O operon sequencing |
| AY763106:5798U20   | TCATATTTACTGTTATTCAC             | O145 O operon sequencing |
| AY763106:6100U20   | GAATTTGGGATATTTTGGCG             | O145 O operon sequencing |
| AY763106:6371U20   | TTAACGTGGGAAGCAGGTT              | O145 O operon sequencing |
| AY763106:6700U20   | GTAAAAGGTGAAAATATGTT             | O145 O operon sequencing |
| AY763106:6996U20   | GGAGGCGGTTAAGACAAATG             | O145 O operon sequencing |
| AY763106:7302U20   | TCGTTTCATGATGACGCTTG             | O145 O operon sequencing |
| AY763106:7604U20   | ATGGTGACCGTCGTATCTCG             | O145 O operon sequencing |
| AY763106:7877U21   | GGACTTAAGCAGGCAGATTTTC           | O145 O operon sequencing |
| AY763106:8204U20   | CGCATTGCAAATGATGAAGC             | O145 O operon sequencing |
| AY763106:8485U21   | GTTTGCGTATACGGTTCCTTC            | O145 O operon sequencing |
| AY763106:8782U21   | GCTAGTTGTTATGCTTTGGGC            | O145 O operon sequencing |
| AY763106:9110U20   | AGGAAAAACCAGAAGCCATG             | O145 O operon sequencing |
| AY763106:9410U20   | CCGATGTACTTTCTCGCCTG             | O145 O operon sequencing |
| AY763106:9698U22   | GCGGGACTATTACAGAGGAGTC           | O145 O operon sequencing |
| AY763106:10011U20  | TATTTGCCCATAGCACACG              | O145 O operon sequencing |
| AY763106:10311U20  | TTTTGGGGAGGCTTGTTAA              | O145 O operon sequencing |
| AY763106:10589U24  | CGGCGATGATTATCATTCACTTCG         | O145 O operon sequencing |
| AY763106:10896U20  | TCTTCACATAATTTCCCGG              | O145 O operon sequencing |
| AY763106:11214U20  | AACTTTTTCGCACTGCAGCA             | O145 O operon sequencing |
| AY763106:11508U20  | TGTCACCAAAGCCCTTATG              | O145 O operon sequencing |
| AY763106:11630L22  | GCTAAGATGGTAACCCAGCATG           | O145 O operon sequencing |
| AY763106:11266L20  | TCTCCTGATGAGATGCGTGC             | O145 O operon sequencing |
| AY763106:10934L20  | GGATCGGGATTGATTGAACC             | O145 O operon sequencing |
| AY763106:10557L20  | GTCATTGAGGCCCAATTACG             | O145 O operon sequencing |
| AY763106:10224L22  | GCCATGCACGAAAAGATAAAAG           | O145 O operon sequencing |
| AY763106:9855L20   | AGCGTACTTCTCCACGAGGC             | O145 O operon sequencing |
| AY763106:9511L24   | AGCCACGGTATTAAGTATATTTGC         | O145 O operon sequencing |
| AY763106:9163L20   | CGACGCTTTGCTGGTATTGC             | O145 O operon sequencing |
| AY763106:8819L24   | CGCTATAGTATCTGGTTCAGAACG         | O145 O operon sequencing |
| AY763106:8477L22   | CCGTATACGCAAATGTTTAGG            | O145 O operon sequencing |
| AY763106:8102L20   | TTAGCGTTTGTCTTTCCCC              | O145 O operon sequencing |
| AY763106:7770L20   | ACCGATAAACCCCTGCAGCGC            | O145 O operon sequencing |
| AY763106:7396L20   | AATGTTTGAATTGTTGCCGC             | O145 O operon sequencing |
| AY763106:7052L20   | CACGCGTTTAATCCCATTCG             | O145 O operon sequencing |
| AY763106:6698L20   | CATATTTTACCTTTTACAG              | O145 O operon sequencing |
| AY763106:6368L20   | CTGCTTCCCCACGTTAAAC              | O145 O operon sequencing |
| AY763106:6016L20   | GCTCTTGCTCATTAGAACAG             | O145 O operon sequencing |
| AY763106:5649L22   | ACGGAAAGAAATAACATTAGCG           | O145 O operon sequencing |

**Supplemental Table 2. Primers and probes used for sequencing and genotyping**

| <b>Primer name</b> | <b>Primer Sequence (5' - 3')</b> | <b>Application</b>       |
|--------------------|----------------------------------|--------------------------|
| AY763106:5312L23   | GGTGCCATAAAGACAAAACAAAG          | O145 O operon sequencing |
| AY763106:4942L20   | CAATTACCAAATTACTTAGC             | O145 O operon sequencing |
| AY763106:4608L20   | ATGGACAATCCAACCGAACC             | O145 O operon sequencing |
| AY763106:4264L20   | AACAGGCGAAGCAAGAGTGC             | O145 O operon sequencing |
| AY763106:3886L20   | TCCCAAGTATACACTTAATG             | O145 O operon sequencing |
| AY763106:3535L30   | TTTTTTCAACATCAATAGTC             | O145 O operon sequencing |
| AY763106:3183L20   | AGGGTTCAGCTGATAGTGC              | O145 O operon sequencing |
| AY763106:2847L20   | TTCAGCCCCTGACGTTCTTC             | O145 O operon sequencing |
| AY763106:2486L20   | CTTTGTTAACAGCGACATCC             | O145 O operon sequencing |
| AY763106:2148L20   | AGACGAGTACCCGAACCACC             | O145 O operon sequencing |
| AY763106:1779L20   | TACAAGCCTGCGACTTCTGG             | O145 O operon sequencing |
| AY763106:1445L20   | AATGAATAAGCCAGGCGCCG             | O145 O operon sequencing |
| AY763106:1094L22   | CCACTTTTCACATTTTCGACCC           | O145 O operon sequencing |
| AY763106:749L20    | GCGAATTTGATCCCCTTTGC             | O145 O operon sequencing |
| AY763106:393L20    | TGCGAGCGGCTTCCAAAAGG             | O145 O operon sequencing |
| AY763106:31L20     | CATGCTGTGAAATAAGCGGC             | O145 O operon sequencing |
| AF078736:74U20     | CCTGGGGACGTATTCAACTG             | O145 O operon sequencing |
| AF078736:431U20    | TTTTTTCTTGTTTCTGGTCG             | O145 O operon sequencing |
| AF078736:776U20    | TACTTTTAGAATGTGATATG             | O145 O operon sequencing |
| AF078736:1129U20   | GGAATGATTGAAGGTCTAGG             | O145 O operon sequencing |
| AF078736:1462U25   | ACAACCTATCCAAGTTCTGAATTTG        | O145 O operon sequencing |
| AF078736:1832U20   | AAATGGGGCTTGCTGGAAGG             | O145 O operon sequencing |
| AF078736:2181U20   | GATACTTCCAATCTGACCCG             | O145 O operon sequencing |
| AF078736:2537U20   | TAACCACGAATCACCTCGCC             | O145 O operon sequencing |
| AF078736:2867U20   | TAAAGCTGTAAACCCGGGCG             | O145 O operon sequencing |
| AF078736:3239U20   | GCTAATTGAAAACGAGAATG             | O145 O operon sequencing |
| AF078736:3556U25   | GGCTAACTAAACACCAAATAAATGC        | O145 O operon sequencing |
| AF078736:3930U20   | CCTGCCATAGCTTTAGCTGC             | O145 O operon sequencing |
| AF078736:4277U20   | TCGCGCCAGTAAATATCTTG             | O145 O operon sequencing |
| AF078736:4641U20   | ATTGTCCAAACCAAGGATGC             | O145 O operon sequencing |
| AF078736:4991U20   | TCCAGGCGTAATACCTTTGC             | O145 O operon sequencing |
| AF078736:5331U20   | GAATGTGTGGTACTGAAGAG             | O145 O operon sequencing |
| AF078736:5667U23   | TTATTGATGCTATTGAGGAATGC          | O145 O operon sequencing |
| AF078736:6040U20   | CGGTCATGCTTACATTAAGC             | O145 O operon sequencing |
| AF078736:6390U20   | CAGAACCTGTAGTACGATTG             | O145 O operon sequencing |
| AF078736:6730U20   | CAGGCCGTTTGATTTTCTGG             | O145 O operon sequencing |
| AF078736:7099U20   | CCCAGAGATCGAAATTTGGG             | O145 O operon sequencing |
| AF078736:7450U20   | TACCCACTTGCTAGTAATAC             | O145 O operon sequencing |
| AF078736:7801U20   | AATGCTATTTTCAGATAAAAC            | O145 O operon sequencing |
| AF078736:8135U23   | GTGATGATATTTTCGAAGAGTCG          | O145 O operon sequencing |
| AF078736:8499U20   | TGATACGGTAGCAAATGCCG             | O145 O operon sequencing |
| AF078736:8838U20   | GGATGTTCCGCATGGATTGC             | O145 O operon sequencing |
| AF078736:9200U20   | TTTAGCCTTTACCATTAAAG             | O145 O operon sequencing |
| AF078736:9555U20   | CTAATTTCTGTTTTGCCTTG             | O145 O operon sequencing |
| AF078736:9904U20   | TCTATTGATTTACTTTTTTC             | O145 O operon sequencing |
| AF078736:10259U20  | TGTTTTACTTGTTTAGATTG             | O145 O operon sequencing |
| AF078736:10584U20  | TTTGGTTTTACAGCTTGGTG             | O145 O operon sequencing |
| AF078736:10961U20  | TGTAATGGAAATTTAGACGC             | O145 O operon sequencing |
| AF078736:11299U20  | ATCTAATGGCGCCCCTGTGG             | O145 O operon sequencing |
| AF078736:11646U23  | CGCTAGAAAGTTTCATTGTACGC          | O145 O operon sequencing |

**Supplemental Table 2. Primers and probes used for sequencing and genotyping**

| <b>Primer name</b> | <b>Primer Sequence (5' - 3')</b> | <b>Application</b>       |
|--------------------|----------------------------------|--------------------------|
| AF078736:11990U20  | TGGATAAAAATTTTAGAAGC             | O145 O operon sequencing |
| AF078736:12343U20  | AGAAAGAAAACGCGAGATGC             | O145 O operon sequencing |
| AF078736:12702U20  | TGCTACCGATTCTGGTGGAG             | O145 O operon sequencing |
| AF078736:13066U20  | AGACTACATTCAAGCCGCGC             | O145 O operon sequencing |
| AF078736:13413U20  | TTATTGATGGTGGCAACACC             | O145 O operon sequencing |
| AF078736:13767U20  | TGGCAACCACTTTTACCGAG             | O145 O operon sequencing |
| AF078736:14119U20  | TTATGCCCAAGGCTTCTCTC             | O145 O operon sequencing |
| AF078736:14468U20  | GGTGCGCACACGTATAAACG             | O145 O operon sequencing |
| AF078736:14425L20  | TCAGATTAGCCGGCAGTACC             | O145 O operon sequencing |
| AF078736:14074L20  | CGCGACGGACTTTCTCAACG             | O145 O operon sequencing |
| AF078736:13730L20  | TTAAGGCCGCCTTTAAGCAG             | O145 O operon sequencing |
| AF078736:13367L20  | TTCAGGGAATCGATAGCAGC             | O145 O operon sequencing |
| AF078736:13020L20  | GATATATAACAAAATCCAGC             | O145 O operon sequencing |
| AF078736:12663L20  | CCATAGCTTCTGCAACAACG             | O145 O operon sequencing |
| AF078736:12340L20  | TCTCGCGTTTTCTTTCTGAC             | O145 O operon sequencing |
| AF078736:11960L20  | ATGAATATTAATATTTTGTG             | O145 O operon sequencing |
| AF078736:11609L20  | GAAATATCAGTCGAAACCCC             | O145 O operon sequencing |
| AF078736:11277L21  | CCATAACCCCTTCATCAATG             | O145 O operon sequencing |
| AF078736:10907L20  | AACTCCAAGTGAAGCCCGC              | O145 O operon sequencing |
| AF078736:10558L20  | ATCATCCCCGTACGTTCAAT             | O145 O operon sequencing |
| AF078736:10218L24  | AAAGGAAATGAGCTAACTTATCG          | O145 O operon sequencing |
| AF078736:9863L20   | AGACAAAAGCTACATAAAGG             | O145 O operon sequencing |
| AF078736:9504L20   | GAGGGAAATGTGTTAGATGC             | O145 O operon sequencing |
| AF078736:9165L20   | AGTGCATTTCCGTAAATGCC             | O145 O operon sequencing |
| AF078736:8825L23   | CGGAACATCCTCCACATATTAAC          | O145 O operon sequencing |
| AF078736:8464L25   | AATCAAATAACTCAAACACGTTT          | O145 O operon sequencing |
| AF078736:8110L20   | GTGCCTGTAACCATATTCTC             | O145 O operon sequencing |
| AF078736:7749L20   | CTTTATTGATATCGACAAAC             | O145 O operon sequencing |
| AF078736:7397L20   | TTATAGGTCTTTCTGATGCC             | O145 O operon sequencing |
| AF078736:7055L22   | GGATTTTTTTTATAACTGCCGG           | O145 O operon sequencing |
| AF078736:6697L20   | GAATGCCTCCAATAATCCC              | O145 O operon sequencing |
| AF078736:6349L20   | AACGCCAATCAGAGAACTCC             | O145 O operon sequencing |
| AF078736:6001L20   | TACCACCATGACTTTCTACG             | O145 O operon sequencing |
| AF078736:5647L20   | CAGGACCAGCTGCACCATTC             | O145 O operon sequencing |
| AF078736:5296L20   | TTACGCCTGCATCACATAGC             | O145 O operon sequencing |
| AF078736:4961L21   | CTATATTTTGCTCCCTGAGGG            | O145 O operon sequencing |
| AF078736:4597L20   | CGCAACCAGACTTGACTCAG             | O145 O operon sequencing |
| AF078736:4253L21   | AAAAACATTCCGCTATTCCAG            | O145 O operon sequencing |
| AF078736:3908L20   | CAGTATTACGGCCTTTCCGGC            | O145 O operon sequencing |
| AF078736:3543L20   | GTTAGCCAAAGGTATTCACG             | O145 O operon sequencing |
| AF078736:3201L20   | GGAACATACTTGATAATTTT             | O145 O operon sequencing |
| AF078736:2835L20   | TTGACCGAAACAACAACACC             | O145 O operon sequencing |
| AF078736:2508L20   | CCATTGCAGGCAAACATACC             | O145 O operon sequencing |
| AF078736:2160L20   | GTCAAATCGCCATAGTGTAG             | O145 O operon sequencing |
| AF078736:1783L20   | TATTTTCATTTTTCTGCCAG             | O145 O operon sequencing |
| AF078736:1445L20   | TGTCTTAACGAACTTTGCGG             | O145 O operon sequencing |
| AF078736:1104L20   | TCCTTGGCACTTTTGACAAC             | O145 O operon sequencing |
| AF078736:731L20    | GCATAGTAACATCAACTGCC             | O145 O operon sequencing |
| AF078736:401L24    | AAAAAGCAGATTAACCTTGGTAGG         | O145 O operon sequencing |
| AF078736:34L21     | CAACTCAGCCCAGATATCAGC            | O145 O operon sequencing |

**Supplemental Table 2. Primers and probes used for sequencing and genotyping**

| <b>Primer name</b> | <b>Primer Sequence (5' - 3')</b> | <b>Application</b>  |
|--------------------|----------------------------------|---------------------|
| O26_rmlA_30_2F     | ACGTTGGATGCAGGATAAAGACGAGTACCC   | O26 O operon MALDI  |
| O26_rmlA_30_2P     | CGAGTACCCGAACCACC                | O26 O operon MALDI  |
| O26_rmlA_30_2R     | ACGTTGGATGGTGTGGTGGAGCAAGATG     | O26 O operon MALDI  |
| O26_wzx_953_2F     | ACGTTGGATGTAAAGGGATGAACGCGCTTC   | O26 O operon MALDI  |
| O26_wzx_953_2P     | GAGCCTTATATCCCAATATAGTACCC       | O26 O operon MALDI  |
| O26_wzx_953_2R     | ACGTTGGATGCATGGTTTTTCATTGTCCTGAG | O26 O operon MALDI  |
| O26_fnl1_88_2F     | ACGTTGGATGTCATCCCTGCTAAATATTCG   | O26 O operon MALDI  |
| O26_fnl1_88_2P     | CCTGCTAAATATTCGTATTTTCAG         | O26 O operon MALDI  |
| O26_fnl1_88_2R     | ACGTTGGATGTGGTGGCACTGGTTCTTTTG   | O26 O operon MALDI  |
| O45_rmlB_966F      | ACGTTGGATGCGTATGTTACTGATCGTCCG   | O45 O operon MALDI  |
| O45_rmlB_966P      | CTCGTCCGGGCCATGACCGTCG           | O45 O operon MALDI  |
| O45_rmlB_966R      | ACGTTGGATGGGTAAATCTAAGCTTGTTGC   | O45 O operon MALDI  |
| O45_wbhQ_721F      | ACGTTGGATGAAAACACCCAGCAGACAGAG   | O45 O operon MALDI  |
| O45_wbhQ_721P      | GCAGCAGACAGAGTTCTGCGA            | O45 O operon MALDI  |
| O45_wbhQ_721R      | ACGTTGGATGCTTTTGATCGCTAATGCGATG  | O45 O operon MALDI  |
| O45_wbhU_241_2F    | ACGTTGGATGCAACGAGTTTGTGCTAAAG    | O45 O operon MALDI  |
| O45_wbhU_241_2P    | ACCAACATTGCGGGAAA                | O45 O operon MALDI  |
| O45_wbhU_241_2R    | ACGTTGGATGGGAATCAGATAAATTCTGGC   | O45 O operon MALDI  |
| O45_wbhU_543_2F    | ACGTTGGATGTCTTGTTCGTGATGGTGGAG   | O45 O operon MALDI  |
| O45_wbhU_543_2P    | TGATAGAACGTCTCATCAAA             | O45 O operon MALDI  |
| O45_wbhU_543_2R    | ACGTTGGATGCGGTATTATCCTGACACGAG   | O45 O operon MALDI  |
| O45_wzy_752F       | ACGTTGGATGCCTGGAAGCTTGTGAAATCG   | O45 O operon MALDI  |
| O45_wzy_752P       | ACCGGAACTATGTGC                  | O45 O operon MALDI  |
| O45_wzy_752R       | ACGTTGGATGTTCTGGTCGCATTTGGTAAG   | O45 O operon MALDI  |
| O45_wzy_906F       | ACGTTGGATGTACCATGGAGCTAGTAGACG   | O45 O operon MALDI  |
| O45_wzy_906P       | GCGACAATGTTTGAAAAGCTAATGCC       | O45 O operon MALDI  |
| O45_wzy_906R       | ACGTTGGATGAAACGTGAATATAAAGAAAG   | O45 O operon MALDI  |
| O45_wbhW_21F       | ACGTTGGATGGGCCGTTGTGAAGAAGAGTA   | O45 O operon MALDI  |
| O45_wbhW_21P       | GAAATGAAAGTGTTGTTTTTATG          | O45 O operon MALDI  |
| O45_wbhW_21R       | ACGTTGGATGCAATGGAGGTATCAAAAAGC   | O45 O operon MALDI  |
| O45_wbhW_997F      | ACGTTGGATGGCCTTTTCATTTTACCACCTC  | O45 O operon MALDI  |
| O45_wbhW_997P      | TTAGATATCTTTATTTAAACAACATCTT     | O45 O operon MALDI  |
| O45_wbhW_997R      | ACGTTGGATGCAAGCTCCTCATCTTCACAG   | O45 O operon MALDI  |
| O45_inter_325F     | ACGTTGGATGATTTACCACTGGAACACGCC   | O45 O operon MALDI  |
| O45_inter_325P     | GAAGTTGGTCTAATCCTGA              | O45 O operon MALDI  |
| O45_inter_325R     | ACGTTGGATGTTCTGGGTATCACCATTGGG   | O45 O operon MALDI  |
| O45_inter_366_2F   | ACGTTGGATGGGAATCAGATAAATTCTGGC   | O45 O operon MALDI  |
| O45_inter_366_2P   | AGAAATATGCACAAGTGATTTTT          | O45 O operon MALDI  |
| O45_inter_366_2R   | ACGTTGGATGAAAACGTATCCTTCAGGCTC   | O45 O operon MALDI  |
| O45_inter_560F     | ACGTTGGATGTAGTGCAATCCCAATACGCC   | O45 O operon MALDI  |
| O45_inter_560P     | CATATTTTGCTTTGTGATAATTAC         | O45 O operon MALDI  |
| O45_inter_560R     | ACGTTGGATGTTTCATATTTAGCTAACAAG   | O45 O operon MALDI  |
| O103_wbtD_937F     | ACGTTGGATGAAAAATCAATAACAATAAG    | O103 O operon MALDI |
| O103_wbtD_937P     | TCAATAACAATAAGAATATTAACCTG       | O103 O operon MALDI |
| O103_wbtD_937R     | ACGTTGGATGTCATCCCTGCTAAATATTCG   | O103 O operon MALDI |
| O111_inter_219_2F  | ACGTTGGATGCCAAAGATGTGAGCAGTTCC   | O111 O operon MALDI |
| O111_inter_219_2P  | TAGCAGTTCCGCGAGATCC              | O111 O operon MALDI |
| O111_inter_219_2R  | ACGTTGGATGTTCTGGTCGCATTTGGTAAG   | O111 O operon MALDI |
| O111_wbdH_1006_2F  | ACGTTGGATGTAATGTACCTGGGTGTAGGG   | O111 O operon MALDI |
| O111_wbdH_1006_2P  | TGTAGGGATATAATAAATGATGGG         | O111 O operon MALDI |

**Supplemental Table 2. Primers and probes used for sequencing and genotyping**

| <b>Primer name</b> | <b>Primer Sequence (5' - 3')</b> | <b>Application</b>  |
|--------------------|----------------------------------|---------------------|
| O111_wbdH_1006_2F  | ACGTTGGATGCAAATGGAGGTATCAAAAAGC  | O111 O operon MALDI |
| O111_wbdK_687_2F   | ACGTTGGATGGTATTGTTGTGCCTTCGAGC   | O111 O operon MALDI |
| O111_wbdK_687_2P   | AAAAGAGAATATGGTTACAGG            | O111 O operon MALDI |
| O111_wbdK_687_2R   | ACGTTGGATGCGACTCTTCGAAAATATCATC  | O111 O operon MALDI |
| O111_wzx_1128_2F   | ACGTTGGATGAAAGGCCATAATGAGCTGCG   | O111 O operon MALDI |
| O111_wzx_1128_2P   | TTAACGTTGAAGCAGCAAG              | O111 O operon MALDI |
| O111_wzx_1128_2R   | ACGTTGGATGGGTAAATCTAAGCTTGTTGC   | O111 O operon MALDI |
| O121_vioA_313_2F   | ACGTTGGATGCTCCTTGGTCTTAAATGGGC   | O121 O operon MALDI |
| O121_vioA_313_2P   | CCTGTTTTTGTTCGATATTGAT           | O121 O operon MALDI |
| O121_vioA_313_2R   | ACGTTGGATGGCCTCTTCAATTCTTCTCGG   | O121 O operon MALDI |
| O121_wbqE_437F     | ACGTTGGATGAATGGGTATCAGCAGAGTGG   | O121 O operon MALDI |
| O121_wbqE_437P     | GCAGAGTGGAACATAATTTTG            | O121 O operon MALDI |
| O121_wbqE_437R     | ACGTTGGATGTTTCAAAGGTCTCCTGTGGC   | O121 O operon MALDI |
| O121_wbqI_582F     | ACGTTGGATGAGTAGCCTGGAGGCCATTAC   | O121 O operon MALDI |
| O121_wbqI_582P     | GAGGCCATTACTACAGT                | O121 O operon MALDI |
| O121_wbqI_582R     | ACGTTGGATGGAGCTGTTTTTACCGACAGA   | O121 O operon MALDI |
| O145_wzy_37F       | ACGTTGGATGGTCAACACCAGAAAAAATAGC  | O145 O operon MALDI |
| O145_wzy_37P       | AACGAAGAAATAATTAACCAAAAAAAAAA    | O145 O operon MALDI |
| O145_wzy_37R       | ACGTTGGATGCACCAGTTTGGTTTGAGAAA   | O145 O operon MALDI |

Supplemental Table 3. Nucleotide polymorphism allele frequencies of O-antigen operon from serogroups.

| Serotype | Sequence Name | Reference sequence position | Gene sequence position | Change   | Codon Change       | A.A. Change | gene       | Polymorphism Type | product                      | Reference | Reference     | Variant | Variant   |
|----------|---------------|-----------------------------|------------------------|----------|--------------------|-------------|------------|-------------------|------------------------------|-----------|---------------|---------|-----------|
|          |               |                             |                        |          |                    |             |            |                   |                              | Frequency | Nucleotide(s) |         | Frequency |
| O26      | AY763106      | 237                         | 162                    | T -> C   | TTT -> TTC         |             | rmlB       | transition        | dTDP-glucose 4,6-dehydratase | 96.90%    | T             | 3.10%   | C         |
|          | AY763106      | 273                         | 198                    | G -> A   | GCG -> GCA         |             | rmlB       | transition        | dTDP-glucose 4,6-dehydratase | 96.90%    | G             | 3.10%   | A         |
|          | AY763106      | 279                         | 204                    | T -> C   | ATT -> ATC         |             | rmlB       | transition        | dTDP-glucose 4,6-dehydratase | 96.90%    | T             | 3.10%   | C         |
|          | AY763106      | 318                         | 243                    | T -> A   | GCT -> GCA         |             | rmlB       | transversion      | dTDP-glucose 4,6-dehydratase | 96.90%    | T             | 3.10%   | A         |
|          | AY763106      | 333                         | 258                    | T -> G   | GTT -> GTG         |             | rmlB       | transversion      | dTDP-glucose 4,6-dehydratase | 96.90%    | T             | 3.10%   | G         |
|          | AY763106      | 336                         | 261                    | C -> T   | GAC -> GAT         |             | rmlB       | transition        | dTDP-glucose 4,6-dehydratase | 96.90%    | C             | 3.10%   | T         |
|          | AY763106      | 342                         | 267                    | A -> C   | TCA -> TCC         |             | rmlB       | transversion      | dTDP-glucose 4,6-dehydratase | 96.90%    | A             | 3.10%   | C         |
|          | AY763106      | 348                         | 273                    | C -> A   | ACC -> ACA         |             | rmlB       | transversion      | dTDP-glucose 4,6-dehydratase | 96.90%    | C             | 3.10%   | A         |
|          | AY763106      | 387                         | 312                    | T -> A   | ACT -> ACA         |             | rmlB       | transversion      | dTDP-glucose 4,6-dehydratase | 96.90%    | T             | 3.10%   | A         |
|          | AY763106      | 393                         | 318                    | C -> T   | GTC -> GTT         |             | rmlB       | transition        | dTDP-glucose 4,6-dehydratase | 96.90%    | C             | 3.10%   | T         |
|          | AY763106      | 399                         | 324                    | G -> A   | TTG -> TTA         |             | rmlB       | transition        | dTDP-glucose 4,6-dehydratase | 96.90%    | G             | 3.10%   | A         |
|          | AY763106      | 440                         | 365                    | AG -> GA | AAG -> AGA         | K -> R      | rmlB       | Substitution      | dTDP-glucose 4,6-dehydratase |           | AG            | 3.10%   | GA        |
|          | AY763106      | 521                         | 446                    | C -> A   | ACA -> AAA         | T -> K      | rmlB       | transversion      | dTDP-glucose 4,6-dehydratase | 96.90%    | C             | 3.10%   | A         |
|          | AY763106      | 526                         | 451                    | G -> A   | GAA -> AAA         | E -> K      | rmlB       | transition        | dTDP-glucose 4,6-dehydratase | 96.90%    | G             | 3.10%   | A         |
|          | AY763106      | 570                         | 495                    | T -> C   | AGT -> AGC         |             | rmlB       | transition        | dTDP-glucose 4,6-dehydratase | 96.90%    | T             | 3.10%   | C         |
|          | AY763106      | 594                         | 519                    | T -> C   | TCT -> TCC         |             | rmlB       | transition        | dTDP-glucose 4,6-dehydratase | 96.90%    | T             | 3.10%   | C         |
|          | AY763106      | 633                         | 558                    | T -> A   | GGT -> GGA         |             | rmlB       | transversion      | dTDP-glucose 4,6-dehydratase | 96.90%    | T             | 3.10%   | A         |
|          | AY763106      | 654                         | 579                    | C -> T   | AAC -> AAT         |             | rmlB       | transition        | dTDP-glucose 4,6-dehydratase | 96.90%    | C             | 3.10%   | T         |
|          | AY763106      | 657                         | 582                    | T -> C   | TGT -> TGC         |             | rmlB       | transition        | dTDP-glucose 4,6-dehydratase | 96.90%    | T             | 3.10%   | C         |
|          | AY763106      | 660                         | 585                    | G -> T   | TCG -> TCT         |             | rmlB       | transversion      | dTDP-glucose 4,6-dehydratase | 96.90%    | G             | 3.10%   | T         |
|          | AY763106      | 666                         | 591                    | C -> T   | AAC -> AAT         |             | rmlB       | transition        | dTDP-glucose 4,6-dehydratase | 96.90%    | C             | 3.10%   | T         |
|          | AY763106      | 669                         | 594                    | C -> T   | TAC -> TAT         |             | rmlB       | transition        | dTDP-glucose 4,6-dehydratase | 96.90%    | C             | 3.10%   | T         |
|          | AY763106      | 672                         | 597                    | C -> T   | GGC -> GGT         |             | rmlB       | transition        | dTDP-glucose 4,6-dehydratase | 96.90%    | C             | 3.10%   | T         |
|          | AY763106      | 681                         | 606                    | C -> T   | CAC -> CAT         |             | rmlB       | transition        | dTDP-glucose 4,6-dehydratase | 96.90%    | C             | 3.10%   | T         |
|          | AY763106      | 684                         | 609                    | T -> C   | TTT -> TTC         |             | rmlB       | transition        | dTDP-glucose 4,6-dehydratase | 96.90%    | T             | 3.10%   | C         |
|          | AY763106      | 702                         | 627                    | GC -> AT | CCG,CTG -> CCA,TTG |             | rmlB       | Substitution      | dTDP-glucose 4,6-dehydratase |           | GC            | 3.10%   | AT        |
|          | AY763106      | 708                         | 633                    | A -> T   | GTA -> GTT         |             | rmlB       | transversion      | dTDP-glucose 4,6-dehydratase | 96.90%    | A             | 3.10%   | T         |
|          | AY763106      | 714                         | 639                    | T -> C   | CTT -> CTC         |             | rmlB       | transition        | dTDP-glucose 4,6-dehydratase | 96.90%    | T             | 3.10%   | C         |
|          | AY763106      | 732                         | 657                    | G -> A   | AAG -> AAA         |             | rmlB       | transition        | dTDP-glucose 4,6-dehydratase | 96.90%    | G             | 3.10%   | A         |
|          | AY763106      | 734                         | 659                    | C -> G   | GCA -> GGA         | A -> G      | rmlB       | transversion      | dTDP-glucose 4,6-dehydratase | 96.90%    | C             | 3.10%   | G         |
|          | AY763106      | 750                         | 675                    | C -> T   | GGC -> GGT         |             | rmlB       | transition        | dTDP-glucose 4,6-dehydratase | 96.90%    | C             | 3.10%   | T         |
|          | AY763106      | 771                         | 696                    | T -> C   | GAT -> GAC         |             | rmlB       | transition        | dTDP-glucose 4,6-dehydratase | 96.90%    | T             | 3.10%   | C         |
|          | AY763106      | 777                         | 702                    | A -> G   | CTA -> CTG         |             | rmlB       | transition        | dTDP-glucose 4,6-dehydratase | 96.90%    | A             | 3.10%   | G         |
|          | AY763106      | 813                         | 738                    | T -> C   | GTT -> GTC         |             | rmlB       | transition        | dTDP-glucose 4,6-dehydratase | 96.90%    | T             | 3.10%   | C         |
|          | AY763106      | 816                         | 741                    | C -> A   | GTC -> GTA         |             | rmlB       | transversion      | dTDP-glucose 4,6-dehydratase | 96.90%    | C             | 3.10%   | A         |
|          | AY763106      | 852                         | 777                    | C -> T   | GGC -> GGT         |             | rmlB       | transition        | dTDP-glucose 4,6-dehydratase | 96.90%    | C             | 3.10%   | T         |
|          | AY763106      | 882                         | 807                    | T -> A   | GTT -> GTA         |             | rmlB       | transversion      | dTDP-glucose 4,6-dehydratase | 96.90%    | T             | 3.10%   | A         |
|          | AY763106      | 888                         | 813                    | G -> C   | CTG -> CTC         |             | rmlB       | transversion      | dTDP-glucose 4,6-dehydratase | 96.90%    | G             | 3.10%   | C         |
|          | AY763106      | 918                         | 843                    | A -> C   | GTA -> GTC         |             | rmlB       | transversion      | dTDP-glucose 4,6-dehydratase | 96.90%    | A             | 3.10%   | C         |
|          | AY763106      | 928                         | 853                    | C -> A   | CAA -> AAA         | Q -> K      | rmlB       | transversion      | dTDP-glucose 4,6-dehydratase | 96.90%    | C             | 3.10%   | A         |
|          | AY763106      | 936                         | 861                    | T -> C   | TAT -> TAC         |             | rmlB       | transition        | dTDP-glucose 4,6-dehydratase | 96.90%    | T             | 3.10%   | C         |
|          | AY763106      | 939                         | 864                    | T -> C   | CGT -> CGC         |             | rmlB       | transition        | dTDP-glucose 4,6-dehydratase | 96.90%    | T             | 3.10%   | C         |
|          | AY763106      | 948                         | 873                    | T -> C   | ATT -> ATC         |             | rmlB       | transition        | dTDP-glucose 4,6-dehydratase | 96.90%    | T             | 3.10%   | C         |
|          | AY763106      | 972                         | 897                    | A -> T   | GGA -> GGT         |             | rmlB       | transversion      | dTDP-glucose 4,6-dehydratase | 96.90%    | A             | 3.10%   | T         |
|          | AY763106      | 1009                        | 934                    | A -> G   | AGC -> GGC         | S -> G      | rmlB       | transition        | dTDP-glucose 4,6-dehydratase | 96.90%    | A             | 3.10%   | G         |
|          | AY763106      | 1011                        | 936                    | C -> T   | AGC -> AGT         |             | rmlB       | transition        | dTDP-glucose 4,6-dehydratase | 96.90%    | C             | 3.10%   | T         |
|          | AY763106      | 1012                        | 937                    | C -> T   | CGC -> TGC         | R -> C      | rmlB       | transition        | dTDP-glucose 4,6-dehydratase | 98.40%    | C             | 1.60%   | T         |
|          | AY763106      | 1023                        | 948                    | C -> A   | GGC -> GGA         |             | rmlB       | transversion      | dTDP-glucose 4,6-dehydratase | 96.90%    | C             | 3.10%   | A         |
|          | AY763106      | 1032                        | 957                    | G -> A   | CCG -> CCA         |             | rmlB       | transition        | dTDP-glucose 4,6-dehydratase | 96.90%    | G             | 3.10%   | A         |
|          | AY763106      | 1050                        | 975                    | C -> T   | AGC -> AGT         |             | rmlB       | transition        | dTDP-glucose 4,6-dehydratase | 96.90%    | C             | 3.10%   | T         |
|          | AY763106      | 1059                        | 984                    | G -> T   | CGG -> CGT         |             | rmlB       | transversion      | dTDP-glucose 4,6-dehydratase | 96.90%    | G             | 3.10%   | T         |
|          | AY763106      | 1062                        | 987                    | G -> A   | AAG -> AAA         |             | rmlB       | transition        | dTDP-glucose 4,6-dehydratase | 96.90%    | G             | 3.10%   | A         |
|          | AY763106      | 1065                        | 990                    | A -> G   | ACA -> ACG         |             | rmlB       | transition        | dTDP-glucose 4,6-dehydratase | 96.90%    | A             | 3.10%   | G         |
|          | AY763106      | 1098                        | 1023                   | C -> T   | GTC -> GTT         |             | rmlB       | transition        | dTDP-glucose 4,6-dehydratase | 96.90%    | C             | 3.10%   | T         |
|          | AY763106      | 1101                        | 1026                   | A -> T   | GAA -> GAT         | E -> D      | rmlB       | transversion      | dTDP-glucose 4,6-dehydratase | 96.90%    | A             | 3.10%   | T         |
|          | AY763106      | 1125                        | 1050                   | G -> A   | CAG -> CAA         |             | rmlB       | transition        | dTDP-glucose 4,6-dehydratase | 96.90%    | G             | 3.10%   | A         |
|          | AY763106      | 1128                        | 1053                   | A -> G   | TCA -> TCG         |             | rmlB       | transition        | dTDP-glucose 4,6-dehydratase | 96.90%    | A             | 3.10%   | G         |
|          | AY763106      | 1136                        | 1061                   | C -> A   | GCA -> GAA         | A -> E      | rmlB       | transversion      | dTDP-glucose 4,6-dehydratase | 96.90%    | C             | 3.10%   | A         |
|          | AY763106      | 1155                        | 1080                   | T -> C   | CGT -> CGC         |             | rmlB       | transition        | dTDP-glucose 4,6-dehydratase | 96.90%    | T             | 3.10%   | C         |
|          | AY763106      | 1178                        |                        | C -> T   |                    |             | intergenic | transition        |                              | 96.90%    | C             | 3.10%   | T         |
|          | AY763106      | 1259                        |                        | T -> C   |                    |             | intergenic | transition        |                              | 96.90%    | T             | 3.10%   | C         |
|          | AY763106      | 1268                        |                        | T -> C   |                    |             | intergenic | transition        |                              | 96.90%    | T             | 3.10%   | C         |
|          | AY763106      | 1271                        |                        | C -> T   |                    |             | intergenic | transition        |                              | 96.90%    | C             | 3.10%   | T         |
|          | AY763106      | 1406                        |                        | A -> G   |                    |             | intergenic | transition        |                              | 96.90%    | A             | 3.10%   | G         |

Supplemental Table 3. Nucleotide polymorphism allele frequencies of O-antigen operon from serogroups.

| Serotype | Sequence Name | Reference sequence position | Gene sequence position | Change   | Codon Change | A.A. Change | Polymorphism gene | Polymorphism Type | product                                 | Reference Frequency | Reference Nucleotide(s) | Variant Frequency | Variant Nucleotide(s) |
|----------|---------------|-----------------------------|------------------------|----------|--------------|-------------|-------------------|-------------------|-----------------------------------------|---------------------|-------------------------|-------------------|-----------------------|
|          |               |                             |                        |          |              |             |                   |                   |                                         |                     |                         |                   |                       |
|          | AY763106      | 1409                        |                        | AA -> GG |              |             | intergenic        | Substitution      |                                         |                     | AA                      | 3.10%             | GG                    |
|          | AY763106      | 1424                        |                        | T -> C   |              |             | intergenic        | transition        |                                         | 96.90%              | T                       | 3.10%             | C                     |
|          | AY763106      | 1455                        |                        | C -> G   |              |             | intergenic        | transversion      |                                         | 96.90%              | C                       | 3.10%             | G                     |
|          | AY763106      | 1460                        |                        | T -> A   |              |             | intergenic        | transversion      |                                         | 96.90%              | T                       | 3.10%             | A                     |
|          | AY763106      | 1463                        |                        | T -> C   |              |             | intergenic        | transition        |                                         | 96.90%              | T                       | 3.10%             | C                     |
|          | AY763106      | 1469                        |                        | G -> T   |              |             | intergenic        | transversion      |                                         | 96.90%              | G                       | 3.10%             | T                     |
|          | AY763106      | 1475                        |                        | T -> C   |              |             | intergenic        | transition        |                                         | 96.90%              | T                       | 3.10%             | C                     |
|          | AY763106      | 1481                        |                        | C -> A   |              |             | intergenic        | transversion      |                                         | 96.90%              | C                       | 3.10%             | A                     |
|          | AY763106      | 1484                        |                        | C -> T   |              |             | intergenic        | transition        |                                         | 96.90%              | C                       | 3.10%             | T                     |
|          | AY763106      | 1487                        |                        | T -> G   |              |             | intergenic        | transversion      |                                         | 96.90%              | T                       | 3.10%             | G                     |
|          | AY763106      | 1490                        |                        | A -> G   |              |             | intergenic        | transition        |                                         | 96.90%              | A                       | 3.10%             | G                     |
|          | AY763106      | 1492                        |                        | A -> C   |              |             | intergenic        | transversion      |                                         | 96.90%              | A                       | 3.10%             | C                     |
|          | AY763106      | 1496                        |                        | C -> T   |              |             | intergenic        | transition        |                                         | 96.90%              | C                       | 3.10%             | T                     |
|          | AY763106      | 1499                        |                        | T -> A   |              |             | intergenic        | transversion      |                                         | 96.90%              | T                       | 3.10%             | A                     |
|          | AY763106      | 1502                        |                        | G -> A   |              |             | intergenic        | transition        |                                         | 96.90%              | G                       | 3.10%             | A                     |
|          | AY763106      | 1510                        |                        | G -> A   |              |             | intergenic        | transition        |                                         | 96.90%              | G                       | 3.10%             | A                     |
|          | AY763106      | 1515                        |                        | A -> G   |              |             | intergenic        | transition        |                                         | 96.90%              | A                       | 3.10%             | G                     |
|          | AY763106      | 1532                        |                        | A -> G   |              |             | intergenic        | transition        |                                         | 96.90%              | A                       | 3.10%             | G                     |
|          | AY763106      | 1562                        |                        | C -> T   |              |             | intergenic        | transition        |                                         | 96.90%              | C                       | 3.10%             | T                     |
|          | AY763106      | 1574                        |                        | G -> A   |              |             | intergenic        | transition        |                                         | 96.90%              | G                       | 3.10%             | A                     |
|          | AY763106      | 1580                        |                        | G -> A   |              |             | intergenic        | transition        |                                         | 96.90%              | G                       | 3.10%             | A                     |
|          | AY763106      | 1583                        |                        | AT -> GC |              |             | intergenic        | Substitution      |                                         |                     | AT                      | 3.10%             | GC                    |
|          | AY763106      | 1589                        |                        | C -> T   |              |             | intergenic        | transition        |                                         | 96.90%              | C                       | 3.10%             | T                     |
|          | AY763106      | 1592                        |                        | A -> G   |              |             | intergenic        | transition        |                                         | 96.90%              | A                       | 3.10%             | G                     |
|          | AY763106      | 1596                        |                        | C -> T   |              |             | intergenic        | transition        |                                         | 96.90%              | C                       | 3.10%             | T                     |
|          | AY763106      | 1598                        |                        | T -> C   |              |             | intergenic        | transition        |                                         | 96.90%              | T                       | 3.10%             | C                     |
|          | AY763106      | 1616                        |                        | C -> T   |              |             | intergenic        | transition        |                                         | 98.40%              | C                       | 1.60%             | T                     |
|          | AY763106      | 1631                        |                        | A -> T   |              |             | intergenic        | transversion      |                                         | 96.90%              | A                       | 3.10%             | T                     |
|          | AY763106      | 1655                        |                        | G -> A   |              |             | intergenic        | transition        |                                         | 96.90%              | G                       | 3.10%             | A                     |
|          | AY763106      | 1661                        |                        | A -> G   |              |             | intergenic        | transition        |                                         | 96.90%              | A                       | 3.10%             | G                     |
|          | AY763106      | 1691                        |                        | G -> C/A |              |             | intergenic        | SNP               |                                         | 95.30%              | G                       | 3.1%/1.6%         | C/A                   |
|          | AY763106      | 1721                        |                        | A -> T   |              |             | intergenic        | transversion      |                                         | 96.90%              | A                       | 3.10%             | T                     |
|          | AY763106      | 1724                        |                        | T -> C   |              |             | intergenic        | transition        |                                         | 96.90%              | T                       | 3.10%             | C                     |
|          | AY763106      | 1727                        |                        | T -> A   |              |             | intergenic        | transversion      |                                         | 96.90%              | T                       | 3.10%             | A                     |
|          | AY763106      | 1730                        |                        | AC -> GT |              |             | intergenic        | Substitution      |                                         |                     | AC                      | 3.10%             | GT                    |
|          | AY763106      | 1733                        |                        | G -> A   |              |             | intergenic        | transition        |                                         | 96.90%              | G                       | 3.10%             | A                     |
|          | AY763106      | 1748                        |                        | A -> G   |              |             | intergenic        | transition        |                                         | 96.90%              | A                       | 3.10%             | G                     |
|          | AY763106      | 1766                        |                        | C -> G   |              |             | intergenic        | transversion      |                                         | 96.90%              | C                       | 3.10%             | G                     |
|          | AY763106      | 1781                        |                        | A -> G   |              |             | intergenic        | transition        |                                         | 96.90%              | A                       | 3.10%             | G                     |
|          | AY763106      | 1807                        |                        | T -> C   |              |             | intergenic        | transition        |                                         | 96.90%              | T                       | 3.10%             | C                     |
|          | AY763106      | 1811                        |                        | C -> T   |              |             | intergenic        | transition        |                                         | 96.90%              | C                       | 3.10%             | T                     |
|          | AY763106      | 1826                        |                        | C -> G   |              |             | intergenic        | transversion      |                                         | 96.90%              | C                       | 3.10%             | G                     |
|          | AY763106      | 1862                        |                        | A -> G   |              |             | intergenic        | transition        |                                         | 96.90%              | A                       | 3.10%             | G                     |
|          | AY763106      | 1874                        |                        | T -> C   |              |             | intergenic        | transition        |                                         | 96.90%              | T                       | 3.10%             | C                     |
|          | AY763106      | 1943                        |                        | G -> A   |              |             | intergenic        | transition        |                                         | 96.90%              | G                       | 3.10%             | A                     |
|          | AY763106      | 1982                        |                        | A -> C   |              |             | intergenic        | transversion      |                                         | 96.90%              | A                       | 3.10%             | C                     |
|          | AY763106      | 1994                        |                        | T -> C   |              |             | intergenic        | transition        |                                         | 96.90%              | T                       | 3.10%             | C                     |
|          | AY763106      | 2003                        |                        | T -> C   |              |             | intergenic        | transition        |                                         | 96.90%              | T                       | 3.10%             | C                     |
|          | AY763106      | 2030                        |                        | C -> T   |              |             | intergenic        | transition        |                                         | 96.90%              | C                       | 3.10%             | T                     |
|          | AY763106      | 2099                        |                        | A -> T   |              |             | intergenic        | transversion      |                                         | 96.90%              | A                       | 3.10%             | T                     |
|          | AY763106      | 2144                        | 27                     | A -> G   | TTA -> TTG   |             | rmlA              | transition        | glucose-1-phosphate thymidyltransferase | 96.90%              | A                       | 3.10%             | G                     |
|          | AY763106      | 2147                        | 30                     | T -> G   | GCT -> GCG   |             | rmlA              | transversion      | glucose-1-phosphate thymidyltransferase | 43.80%              | T                       | 56.30%            | G                     |
|          | AY763106      | 2156                        | 39                     | G -> T   | TCG -> TCT   |             | rmlA              | transversion      | glucose-1-phosphate thymidyltransferase | 96.90%              | G                       | 3.10%             | T                     |
|          | AY763106      | 2177                        | 60                     | A -> G   | GTA -> GTG   |             | rmlA              | transition        | glucose-1-phosphate thymidyltransferase | 96.90%              | A                       | 3.10%             | G                     |
|          | AY763106      | 2180                        | 63                     | T -> G   | ACT -> ACC   |             | rmlA              | transversion      | glucose-1-phosphate thymidyltransferase | 96.90%              | T                       | 3.10%             | G                     |
|          | AY763106      | 2186                        | 69                     | T -> C   | GCT -> GCC   |             | rmlA              | transition        | glucose-1-phosphate thymidyltransferase | 96.90%              | T                       | 3.10%             | C                     |
|          | AY763106      | 2199                        | 82                     | T -> C   | TTG -> CTG   |             | rmlA              | transition        | glucose-1-phosphate thymidyltransferase | 96.90%              | T                       | 3.10%             | C                     |
|          | AY763106      | 2238                        | 121                    | T -> C   | TTG -> CTG   |             | rmlA              | transition        | glucose-1-phosphate thymidyltransferase | 96.90%              | T                       | 3.10%             | C                     |
|          | AY763106      | 2240                        | 123                    | G -> T   | TTG -> TTT   |             | rmlA              | transversion      | glucose-1-phosphate thymidyltransferase | 96.90%              | G                       | 3.10%             | T                     |
|          | AY763106      | 2262                        | 145                    | C -> A   | CTT -> ATT   | L -> I      | rmlA              | transversion      | glucose-1-phosphate thymidyltransferase | 96.90%              | C                       | 3.10%             | A                     |
|          | AY763106      | 2276                        | 159                    | G -> A   | CTG -> CTA   |             | rmlA              | transition        | glucose-1-phosphate thymidyltransferase | 96.90%              | G                       | 3.10%             | A                     |
|          | AY763106      | 2282                        | 165                    | T -> A   | ATT -> ATA   |             | rmlA              | transversion      | glucose-1-phosphate thymidyltransferase | 96.90%              | T                       | 3.10%             | A                     |
|          | AY763106      | 2333                        | 216                    | C -> T   | AGC -> AGT   |             | rmlA              | transition        | glucose-1-phosphate thymidyltransferase | 96.90%              | C                       | 3.10%             | T                     |
|          | AY763106      | 2536                        | 419                    | T -> C   | GTT -> GCT   | V -> A      | rmlA              | transition        | glucose-1-phosphate thymidyltransferase | 98.40%              | T                       | 1.60%             | C                     |
|          | AY763106      | 2651                        | 534                    | T -> C   | TTT -> TTC   |             | rmlA              | transition        | glucose-1-phosphate thymidyltransferase | 96.90%              | T                       | 3.10%             | C                     |

Supplemental Table 3. Nucleotide polymorphism allele frequencies of O-antigen operon from serogroups.

| Serotype | Sequence Name | Reference sequence position | Gene sequence position | Change   | Codon Change | A.A.   |             | Polymorphism |                                         | Reference Frequency | Reference Nucleotide(s) | Variant Frequency | Variant Nucleotide(s) |
|----------|---------------|-----------------------------|------------------------|----------|--------------|--------|-------------|--------------|-----------------------------------------|---------------------|-------------------------|-------------------|-----------------------|
|          |               |                             |                        |          |              | Change | gene        | Type         | product                                 |                     |                         |                   |                       |
|          | AY763106      | 2661                        | 544                    | T->G     | TAC->GAC     | Y->D   | <i>rmlA</i> | transversion | glucose-1-phosphate thymidyltransferase | 96.90%              | T                       | 3.10%             | G                     |
|          | AY763106      | 2903                        | 786                    | G->T     | GGG->GGT     |        | <i>rmlA</i> | transversion | glucose-1-phosphate thymidyltransferase | 96.90%              | G                       | 3.10%             | T                     |
|          | AY763106      | 3075                        | 75                     | C->T     | TTC->TTT     |        | <i>rmlC</i> | transition   | dTDP-6-deoxy-D-glucose-3,5 epimerase    | 96.90%              | C                       | 3.10%             | T                     |
|          | AY763106      | 3201                        | 201                    | C->T     | CCG->CCT     |        | <i>rmlC</i> | transition   | dTDP-6-deoxy-D-glucose-3,5 epimerase    | 96.90%              | C                       | 3.10%             | T                     |
|          | AY763106      | 3776                        | 234                    | G->A     | GTG->GTA     |        | <i>wzx</i>  | transition   | putative O-antigen flippase             | 96.90%              | G                       | 3.10%             | A                     |
|          | AY763106      | 3829                        | 287                    | G->C     | TGT->TCT     | C->S   | <i>wzx</i>  | transversion | putative O-antigen flippase             | 81.30%              | G                       | 18.80%            | C                     |
|          | AY763106      | 4083                        | 541                    | G->A     | GTG->ATG     | V->M   | <i>wzx</i>  | transition   | putative O-antigen flippase             | 98.40%              | G                       | 1.60%             | A                     |
|          | AY763106      | 4121                        | 579                    | T->A     | CTT->CTA     |        | <i>wzx</i>  | transversion | putative O-antigen flippase             | 96.90%              | T                       | 3.10%             | A                     |
|          | AY763106      | 4326                        | 784                    | A->G     | ATT->GTT     | I->V   | <i>wzx</i>  | transition   | putative O-antigen flippase             | 98.40%              | A                       | 1.60%             | G                     |
|          | AY763106      | 4454                        | 912                    | G->A     | CAG->CAA     |        | <i>wzx</i>  | transition   | putative O-antigen flippase             | 96.90%              | G                       | 3.10%             | A                     |
|          | AY763106      | 4495                        | 953                    | T->G     | GTG->GGG     | V->G   | <i>WZX</i>  | transversion | putative O-antigen flippase             | 84.40%              | T                       | 15.60%            | G                     |
|          | AY763106      | 4795                        | 1253                   | A->G     | AAA->AGA     | K->R   | <i>wzx</i>  | transition   | putative O-antigen flippase             | 96.90%              | A                       | 3.10%             | G                     |
|          | AY763106      | 5242                        | 372                    | G->A     | AGG->AGA     |        | <i>wzy</i>  | transition   | putative O-antigen polymerase           | 98.40%              | G                       | 1.60%             | A                     |
|          | AY763106      | 5276                        | 406                    | C->T     | CTT->TTT     | L->F   | <i>wzy</i>  | transition   | putative O-antigen polymerase           | 95.30%              | C                       | 4.70%             | T                     |
|          | AY763106      | 5425                        | 555                    | T->G     | TTT->TTG     | F->L   | <i>wzy</i>  | transversion | putative O-antigen polymerase           | 90.60%              | T                       | 9.40%             | G                     |
|          | AY763106      | 6034                        | 126                    | G->A     | GAG->GAA     |        | <i>wbuA</i> | transition   | putative rhamnosyl transferase          | 96.90%              | G                       | 3.10%             | A                     |
|          | AY763106      | 6622                        | 714                    | T->C     | AGT->AGC     |        | <i>wbuA</i> | transition   | putative rhamnosyl transferase          | 96.90%              | T                       | 3.10%             | C                     |
|          | AY763106      | 6673                        | 765                    | C->T     | AGC->AGT     |        | <i>wbuA</i> | transition   | putative rhamnosyl transferase          | 96.90%              | C                       | 3.10%             | T                     |
|          | AY763106      | 6802                        | 88                     | A->G     | ACT->GCT     | T->A   | <i>fnl1</i> | transition   | Fnl1                                    | 43.80%              | A                       | 56.30%            | G                     |
|          | AY763106      | 7050                        | 336                    | T->A     | ATT->ATA     |        | <i>fnl1</i> | transversion | Fnl1                                    | 96.90%              | T                       | 3.10%             | A                     |
|          | AY763106      | 7233                        | 519                    | G->A     | TCG->TCA     |        | <i>fnl1</i> | transition   | Fnl1                                    | 95.30%              | G                       | 4.70%             | A                     |
|          | AY763106      | 7356                        | 642                    | A->G     | GAA->GAG     |        | <i>fnl1</i> | transition   | Fnl1                                    | 96.90%              | A                       | 3.10%             | G                     |
|          | AY763106      | 8029                        | 297                    | A->T     | TCA->TCT     |        | <i>fnl2</i> | transversion | Fnl2                                    | 96.90%              | A                       | 3.10%             | T                     |
|          | AY763106      | 8076                        | 344                    | T->C     | GTT->GCT     | V->A   | <i>fnl2</i> | transition   | Fnl2                                    | 85.90%              | T                       | 14.10%            | C                     |
|          | AY763106      | 8131                        | 399                    | T->C     | ATT->ATC     |        | <i>fnl2</i> | transition   | Fnl2                                    | 96.90%              | T                       | 3.10%             | C                     |
|          | AY763106      | 8194                        | 462                    | T->A     | ACT->ACA     |        | <i>fnl2</i> | transversion | Fnl2                                    | 96.90%              | T                       | 3.10%             | A                     |
|          | AY763106      | 8371                        | 639                    | A->G     | GCA->GCG     |        | <i>fnl2</i> | transition   | Fnl2                                    | 98.40%              | A                       | 1.60%             | G                     |
|          | AY763106      | 8480                        | 748                    | A->G     | AAA->GAA     | K->E   | <i>fnl2</i> | transition   | Fnl2                                    | 96.90%              | A                       | 3.10%             | G                     |
|          | AY763106      | 9003                        | 132                    | C->T     | TTC->TTT     |        | <i>fnl3</i> | transition   | Fnl3                                    | 96.90%              | C                       | 3.10%             | T                     |
|          | AY763106      | 9612                        | 741                    | T->C     | TTT->TTC     |        | <i>fnl3</i> | transition   | Fnl3                                    | 96.90%              | T                       | 3.10%             | C                     |
|          | AY763106      | 9975                        | 1104                   | G->A     | AAG->AAA     |        | <i>fnl3</i> | transition   | Fnl3                                    | 96.90%              | G                       | 3.10%             | A                     |
|          | AY763106      | 10265                       | 282                    | C->T     | ATC->ATT     |        | <i>wbuB</i> | transition   | putative L-fucosamine transferase       | 98.40%              | C                       | 1.60%             | T                     |
|          | AY763106      | 10349                       | 366                    | C->T     | TGC->TGT     |        | <i>wbuB</i> | transition   | putative L-fucosamine transferase       | 98.40%              | C                       | 1.60%             | T                     |
|          | AY763106      | 10424                       | 441                    | C->T     | GGC->GGT     |        | <i>wbuB</i> | transition   | putative L-fucosamine transferase       | 96.90%              | C                       | 3.10%             | T                     |
|          | AY763106      | 10782                       | 799                    | T->G     | TCT->GCT     | S->A   | <i>wbuB</i> | transversion | putative L-fucosamine transferase       | 96.90%              | T                       | 3.10%             | G                     |
|          | AY763106      | 10871                       | 888                    | C->T     | GGC->GGT     |        | <i>wbuB</i> | transition   | putative L-fucosamine transferase       | 96.90%              | C                       | 3.10%             | T                     |
|          | AY763106      | 10910                       | 927                    | C->T     | TTT->TTT     |        | <i>wbuB</i> | transition   | putative L-fucosamine transferase       | 96.90%              | C                       | 3.10%             | T                     |
|          | AY763106      | 10928                       | 945                    | G->A     | GGG->GGA     |        | <i>wbuB</i> | transition   | putative L-fucosamine transferase       | 96.90%              | G                       | 3.10%             | A                     |
|          | AY763106      | 11015                       | 1032                   | C->T     | TTT->TTT     |        | <i>wbuB</i> | transition   | putative L-fucosamine transferase       | 95.30%              | C                       | 4.70%             | T                     |
|          | AY763106      | 11122                       | 1139                   | A->C     | AAG->ACG     | K->T   | <i>wbuB</i> | transversion | putative L-fucosamine transferase       | 96.90%              | A                       | 3.10%             | C                     |
|          | AY763106      | 11207                       |                        | A->C     |              |        | intergenic  | transversion |                                         | 96.90%              | A                       | 3.10%             | C                     |
|          | AY763106      | 11423                       |                        | C->A     |              |        | intergenic  | transversion |                                         | 78.10%              | C                       | 21.90%            | A                     |
|          | AY763106      | 11449                       |                        | C->T     |              |        | intergenic  | transition   |                                         | 98.40%              | C                       | 1.60%             | T                     |
|          | AY763106      | 11482                       |                        | A->T     |              |        | intergenic  | transversion |                                         | 98.40%              | A                       | 1.60%             | T                     |
|          | AY763106      | 11645                       |                        | T->C     |              |        | intergenic  | transition   |                                         | 98.40%              | T                       | 1.60%             | C                     |
| O45      | AY771223      | 1024                        | 966                    | C->T     | CGC->CGT     |        | <i>rmlB</i> | transition   | dTDP-D-glucose-4,6-dehydratase          | 91.70%              | C                       | 8.30%             | T                     |
|          | AY771223      | 2916                        | 721                    | A->C     | ATC->CTC     | I->L   | <i>wbhQ</i> | transversion | glycosyl transferase                    | 91.70%              | A                       | 8.30%             | C                     |
|          | AY771223      | 6780                        | 448                    | G->T     | GTA->TTA     | V->L   | <i>wbhT</i> | transversion | dTDP-glucose-4,6-dehydratase            |                     | G                       | 100.00%           | T                     |
|          | AY771223      | 7777                        | 634                    | C->A     | CGA->AGA     |        | <i>wzx</i>  | transversion | O antigen flippase                      | 91.70%              | C                       | 8.30%             | A                     |
|          | AY771223      | 7792                        | 649                    | G->A     | GAT->AAT     | D->N   | <i>wzx</i>  | transition   | O antigen flippase                      | 91.70%              | G                       | 8.30%             | A                     |
|          | AY771223      | 8627                        | 241                    | A->G     | GTT->ATT     | L->I   | <i>wbhU</i> | transition   | glycosyl transferase                    | 91.70%              | A                       | 8.30%             | G                     |
|          | AY771223      | 8929                        | 543                    | T->C     | GGT->GGC     |        | <i>wbhU</i> | transition   | glycosyl transferase                    | 91.70%              | T                       | 8.30%             | C                     |
|          | AY771223      | 9444                        | 79                     | G->T     | GTG->TTG     | V->L   | <i>wzy</i>  | transversion | O antigen polymerase                    |                     | G                       | 100.00%           | T                     |
|          | AY771223      | 10117                       | 752                    | C->T     | GCG->GTG     | A->V   | <i>wzy</i>  | transition   | O antigen polymerase                    | 91.70%              | C                       | 8.30%             | T                     |
|          | AY771223      | 10271                       | 906                    | C->T     | CCC->CCT     |        | <i>wzy</i>  | transition   | O antigen polymerase                    | 91.70%              | C                       | 8.30%             | T                     |
|          | AY771223      | 11065                       | 21                     | T->C     | TGT->TGC     |        | <i>wbhW</i> | transition   | unknown                                 | 91.70%              | T                       | 8.30%             | C                     |
|          | AY771223      | 11527                       | 483                    | T->C     | AAT->AAC     |        | <i>wbhW</i> | transition   | unknown                                 | 91.70%              | T                       | 8.30%             | C                     |
|          | AY771223      | 11545                       | 501                    | A->T     | GCA->GCT     |        | <i>wbhW</i> | transversion | unknown                                 | 91.70%              | A                       | 8.30%             | T                     |
|          | AY771223      | 12041                       | 997                    | G->T     |              |        | <i>wbhW</i> | transversion | unknown                                 | 91.70%              | G                       | 8.30%             | T                     |
|          | AY771223      | 13165                       |                        | Deletion |              |        | intergenic  | Deletion     |                                         |                     | A                       | 8.30%             | C                     |
|          | AY771223      | 13299                       |                        | A->C     |              |        | intergenic  | transversion |                                         | 91.70%              | A                       | 8.30%             | C                     |

Supplemental Table 3. Nucleotide polymorphism allele frequencies of O-antigen operon from serogroups.

| Serotype | Sequence Name | Reference sequence position | Gene sequence position | Change             | Codon Change | A.A. Change | Polymorphism gene | Polymorphism Type | Product                               | Reference                             | Reference     | Variant        | Variant       |   |
|----------|---------------|-----------------------------|------------------------|--------------------|--------------|-------------|-------------------|-------------------|---------------------------------------|---------------------------------------|---------------|----------------|---------------|---|
|          |               |                             |                        |                    |              |             |                   |                   |                                       | Frequency                             | Nucleotide(s) | Frequency      | Nucleotide(s) |   |
| O103     | AY771223      | 13343                       |                        | Deletion           |              |             | intergenic        | Deletion          |                                       |                                       | A             | 16.70%         |               |   |
|          | AY771223      | 13534                       |                        | C -> A             |              |             | intergenic        | transversion      |                                       | 91.70%                                | C             | 8.30%          | A             |   |
|          | AY771223      | 13646                       |                        | A -> T             |              |             | intergenic        | transversion      |                                       |                                       | A             | 100.00%        | T             |   |
|          | AY771223      | 13673                       |                        | G -> A             |              |             | intergenic        | transition        |                                       | 91.70%                                | G             | 8.30%          | A             |   |
|          | AY532664      | 145                         | 39                     | T -> C             | GGT -> GGC   |             |                   | <i>rmlB</i>       | transition                            | putative dTDP-glucose 4,6-dehydratase | 95.80%        | T              | 4.20%         | C |
|          | AY532664      | 208                         | 102                    | G -> A             | TTG -> TTA   |             |                   | <i>rmlB</i>       | transition                            | putative dTDP-glucose 4,6-dehydratase | 25.00%        | G              | 75.00%        | A |
|          | AY532664      | 229                         | 123                    | G -> A             | GAG -> GAA   |             |                   | <i>rmlB</i>       | transition                            | putative dTDP-glucose 4,6-dehydratase | 25.00%        | G              | 75.00%        | A |
|          | AY532664      | 238                         | 132                    | T -> A             | GCT -> GCA   |             |                   | <i>rmlB</i>       | transversion                          | putative dTDP-glucose 4,6-dehydratase | 29.20%        | T              | 70.80%        | A |
| AY532664 | 250           | 144                         | T -> C                 | GAT -> GAC         |              |             | <i>rmlB</i>       | transition        | putative dTDP-glucose 4,6-dehydratase | 25.00%                                | T             | 75.00%         | C             |   |
| AY532664 | 254           | 148                         | G -> A                 | GAA -> AAA         |              | E -> K      | <i>rmlB</i>       | transition        | putative dTDP-glucose 4,6-dehydratase | 29.20%                                | G             | 70.80%         | A             |   |
| AY532664 | 290           | 184                         | T -> G                 | TCT -> GCT         |              | S -> A      | <i>rmlB</i>       | transversion      | putative dTDP-glucose 4,6-dehydratase | 25.00%                                | T             | 75.00%         | G             |   |
| AY532664 | 294           | 188                         | T -> C                 | GTT -> GCT         |              | V -> A      | <i>rmlB</i>       | transition        | putative dTDP-glucose 4,6-dehydratase | 25.00%                                | T             | 75.00%         | C             |   |
| AY532664 | 304           | 198                         | G -> A                 | GCG -> GCA         |              |             | <i>rmlB</i>       | transition        | putative dTDP-glucose 4,6-dehydratase | 95.80%                                | G             | 4.20%          | A             |   |
| AY532664 | 331           | 225                         | T -> G                 | GAT -> GAG         |              | D -> E      | <i>rmlB</i>       | transversion      | putative dTDP-glucose 4,6-dehydratase | 95.80%                                | T             | 4.20%          | G             |   |
| AY532664 | 364           | 258                         | G -> T                 | GTG -> GTT         |              |             | <i>rmlB</i>       | transversion      | putative dTDP-glucose 4,6-dehydratase | 95.80%                                | G             | 4.20%          | T             |   |
| AY532664 | 367           | 261                         | T -> C                 | GAT -> GAC         |              |             | <i>rmlB</i>       | transition        | putative dTDP-glucose 4,6-dehydratase | 95.80%                                | T             | 4.20%          | C             |   |
| AY532664 | 382           | 276                         | C -> T                 | GGC -> GGT         |              |             | <i>rmlB</i>       | transition        | putative dTDP-glucose 4,6-dehydratase | 95.80%                                | C             | 4.20%          | T             |   |
| AY532664 | 418           | 312                         | T -> A                 | ACT -> ACA         |              |             | <i>rmlB</i>       | transversion      | putative dTDP-glucose 4,6-dehydratase | 95.80%                                | T             | 4.20%          | A             |   |
| AY532664 | 436           | 330                         | G -> C                 | GCG -> GCC         |              |             | <i>rmlB</i>       | transversion      | putative dTDP-glucose 4,6-dehydratase | 25.00%                                | G             | 75.00%         | C             |   |
| AY532664 | 464           | 358                         | G -> A                 | GGC -> AGC         |              | G -> S      | <i>rmlB</i>       | transition        | putative dTDP-glucose 4,6-dehydratase | 25.00%                                | G             | 75.00%         | A             |   |
| AY532664 | 465           | 359                         | G -> A                 | GGC -> GAC         |              | G -> D      | <i>rmlB</i>       | transition        | putative dTDP-glucose 4,6-dehydratase | 95.80%                                | G             | 4.20%          | A             |   |
| AY532664 | 514           | 408                         | C -> A                 | GTC -> GTA         |              |             | <i>rmlB</i>       | transversion      | putative dTDP-glucose 4,6-dehydratase | 29.20%                                | C             | 70.80%         | A             |   |
| AY532664 | 520           | 414                         | C -> T                 | GGC -> GGT         |              |             | <i>rmlB</i>       | transition        | putative dTDP-glucose 4,6-dehydratase | 25.00%                                | C             | 75.00%         | T             |   |
| AY532664 | 524           | 418                         | C -> T                 | CTG -> TTG         |              |             | <i>rmlB</i>       | transition        | putative dTDP-glucose 4,6-dehydratase | 25.00%                                | C             | 75.00%         | T             |   |
| AY532664 | 535           | 429                         | T -> A                 | CCT -> CCA         |              |             | <i>rmlB</i>       | transversion      | putative dTDP-glucose 4,6-dehydratase | 95.80%                                | T             | 4.20%          | A             |   |
| AY532664 | 538           | 432                         | C -> T                 | GAC -> GAT         |              |             | <i>rmlB</i>       | transition        | putative dTDP-glucose 4,6-dehydratase | 95.80%                                | C             | 4.20%          | T             |   |
| AY532664 | 541           | 435                         | A -> G                 | GAA -> GAG         |              |             | <i>rmlB</i>       | transition        | putative dTDP-glucose 4,6-dehydratase | 29.20%                                | A             | 70.80%         | G             |   |
| AY532664 | 552           | 446                         | CA -> AC               | ACA -> AAC         |              | T -> N      | <i>rmlB</i>       | Substitution      | putative dTDP-glucose 4,6-dehydratase |                                       | CA            | 4.20%          | AC            |   |
| AY532664 | 566           | 460                         | C -> T                 | CTC -> TTC         |              | L -> F      | <i>rmlB</i>       | transition        | putative dTDP-glucose 4,6-dehydratase | 25.00%                                | C             | 75.00%         | T             |   |
| AY532664 | 568           | 462                         | C -> A                 | CTC -> CTA         |              |             | <i>rmlB</i>       | transversion      | putative dTDP-glucose 4,6-dehydratase | 25.00%                                | C             | 75.00%         | A             |   |
| AY532664 | 580           | 474                         | G -> A                 | ACG -> ACA         |              |             | <i>rmlB</i>       | transition        | putative dTDP-glucose 4,6-dehydratase | 29.20%                                | G             | 70.80%         | A             |   |
| AY532664 | 601           | 495                         | T -> C                 | AGT -> AGC         |              |             | <i>rmlB</i>       | transition        | putative dTDP-glucose 4,6-dehydratase | 25.00%                                | T             | 75.00%         | C             |   |
| AY532664 | 604           | 498                         | T -> A                 | CCT -> CCA         |              |             | <i>rmlB</i>       | transversion      | putative dTDP-glucose 4,6-dehydratase | 95.80%                                | T             | 4.20%          | A             |   |
| AY532664 | 610           | 504                         | C -> T                 | TCC -> TCT         |              |             | <i>rmlB</i>       | transition        | putative dTDP-glucose 4,6-dehydratase | 95.80%                                | C             | 4.20%          | T             |   |
| AY532664 | 625           | 519                         | C -> T                 | TCC -> TCT         |              |             | <i>rmlB</i>       | transition        | putative dTDP-glucose 4,6-dehydratase | 29.20%                                | C             | 70.80%         | T             |   |
| AY532664 | 646           | 540                         | T -> G                 | GCT -> GCG         |              |             | <i>rmlB</i>       | transversion      | putative dTDP-glucose 4,6-dehydratase | 25.00%                                | T             | 75.00%         | G             |   |
| AY532664 | 655           | 549                         | T -> A                 | CGT -> CGA         |              |             | <i>rmlB</i>       | transversion      | putative dTDP-glucose 4,6-dehydratase | 95.80%                                | T             | 4.20%          | A             |   |
| AY532664 | 673           | 567                         | T -> C                 | ACT -> ACC         |              |             | <i>rmlB</i>       | transition        | putative dTDP-glucose 4,6-dehydratase | 25.00%                                | T             | 75.00%         | C             |   |
| AY532664 | 685           | 579                         | C -> T                 | AAC -> AAT         |              |             | <i>rmlB</i>       | transition        | putative dTDP-glucose 4,6-dehydratase | 95.80%                                | C             | 4.20%          | T             |   |
| AY532664 | 688           | 582                         | T -> C                 | TGT -> TGC         |              |             | <i>rmlB</i>       | transition        | putative dTDP-glucose 4,6-dehydratase | 95.80%                                | T             | 4.20%          | C             |   |
| AY532664 | 691           | 585                         | G -> T                 | TCG -> TCT         |              |             | <i>rmlB</i>       | transversion      | putative dTDP-glucose 4,6-dehydratase | 95.80%                                | G             | 4.20%          | T             |   |
| AY532664 | 694           | 588                         | T -> C                 | AAT -> AAC         |              |             | <i>rmlB</i>       | transition        | putative dTDP-glucose 4,6-dehydratase | 95.80%                                | T             | 4.20%          | C             |   |
| AY532664 | 697           | 591                         | C -> T                 | AAC -> AAT         |              |             | <i>rmlB</i>       | transition        | putative dTDP-glucose 4,6-dehydratase | 95.80%                                | C             | 4.20%          | T             |   |
| AY532664 | 700           | 594                         | C -> T                 | TAC -> TAT         |              |             | <i>rmlB</i>       | transition        | putative dTDP-glucose 4,6-dehydratase | 95.80%                                | C             | 4.20%          | T             |   |
| AY532664 | 706           | 600                         | G -> T                 | CCG -> CCT         |              |             | <i>rmlB</i>       | transversion      | putative dTDP-glucose 4,6-dehydratase | 25.00%                                | G             | 75.00%         | T             |   |
| AY532664 | 712           | 606                         | T -> C                 | CAT -> CAC         |              |             | <i>rmlB</i>       | transition        | putative dTDP-glucose 4,6-dehydratase | 29.20%                                | T             | 70.80%         | C             |   |
| AY532664 | 715           | 609                         | C -> T                 | TTG -> TTT         |              |             | <i>rmlB</i>       | transition        | putative dTDP-glucose 4,6-dehydratase | 29.20%                                | C             | 70.80%         | T             |   |
| AY532664 | 733           | 627                         | CT -> AC               | CCC,TTG -> CCA,CTG |              |             | <i>rmlB</i>       | Substitution      | putative dTDP-glucose 4,6-dehydratase |                                       | CT            | 70.8% -> 75.0% | AC            |   |
| AY532664 | 736           | 630                         | G -> A                 | TTG -> TTA         |              |             | <i>rmlB</i>       | transition        | putative dTDP-glucose 4,6-dehydratase | 29.20%                                | G             | 70.80%         | A             |   |
| AY532664 | 739           | 633                         | T -> A                 | GTT -> GTA         |              |             | <i>rmlB</i>       | transversion      | putative dTDP-glucose 4,6-dehydratase | 29.20%                                | T             | 70.80%         | A             |   |
| AY532664 | 745           | 639                         | C -> T                 | CTC -> CTT         |              |             | <i>rmlB</i>       | transition        | putative dTDP-glucose 4,6-dehydratase | 25.00%                                | C             | 75.00%         | T             |   |
| AY532664 | 751           | 645                         | T -> A                 | GCT -> GCA         |              |             | <i>rmlB</i>       | transversion      | putative dTDP-glucose 4,6-dehydratase | 95.80%                                | T             | 4.20%          | A             |   |
| AY532664 | 763           | 657                         | A -> G                 | AAA -> AAG         |              |             | <i>rmlB</i>       | transition        | putative dTDP-glucose 4,6-dehydratase | 29.20%                                | A             | 70.80%         | G             |   |
| AY532664 | 765           | 659                         | G -> C                 | GGA -> GCA         |              | G -> A      | <i>rmlB</i>       | transversion      | putative dTDP-glucose 4,6-dehydratase | 25.00%                                | G             | 75.00%         | C             |   |
| AY532664 | 806           | 700                         | C -> T                 | CTG -> TTG         |              |             | <i>rmlB</i>       | transition        | putative dTDP-glucose 4,6-dehydratase | 95.80%                                | C             | 4.20%          | T             |   |
| AY532664 | 826           | 720                         | G -> A                 | GCG -> GCA         |              |             | <i>rmlB</i>       | transition        | putative dTDP-glucose 4,6-dehydratase | 29.20%                                | G             | 70.80%         | A             |   |
| AY532664 | 886           | 780                         | A -> G                 | GGA -> GGG         |              |             | <i>rmlB</i>       | transition        | putative dTDP-glucose 4,6-dehydratase | 95.80%                                | A             | 4.20%          | G             |   |
| AY532664 | 907           | 801                         | C -> A                 | ATC -> ATA         |              |             | <i>rmlB</i>       | transversion      | putative dTDP-glucose 4,6-dehydratase | 95.80%                                | C             | 4.20%          | A             |   |
| AY532664 | 935           | 829                         | T -> C                 | TTG -> CTG         |              |             | <i>rmlB</i>       | transition        | putative dTDP-glucose 4,6-dehydratase | 95.80%                                | T             | 4.20%          | C             |   |
| AY532664 | 949           | 843                         | C -> A                 | GTC -> GTA         |              |             | <i>rmlB</i>       | transversion      | putative dTDP-glucose 4,6-dehydratase | 25.00%                                | C             | 75.00%         | A             |   |
| AY532664 | 967           | 861                         | C -> T                 | TAC -> TAT         |              |             | <i>rmlB</i>       | transition        | putative dTDP-glucose 4,6-dehydratase | 95.80%                                | C             | 4.20%          | T             |   |
| AY532664 | 970           | 864                         | T -> C                 | CGT -> CGC         |              |             | <i>rmlB</i>       | transition        | putative dTDP-glucose 4,6-dehydratase | 29.20%                                | T             | 70.80%         | C             |   |
| AY532664 | 979           | 873                         | T -> C                 | ATT -> ATC         |              |             | <i>rmlB</i>       | transition        | putative dTDP-glucose 4,6-dehydratase | 95.80%                                | T             | 4.20%          | C             |   |

Supplemental Table 3. Nucleotide polymorphism allele frequencies of O-antigen operon from serogroups.

| Serotype | Sequence Name | Reference sequence position | Gene sequence position | Change | Codon Change | A.A. Change | gene       | Polymorphism Type | product                                           | Reference Frequency | Reference Nucleotide(s) | Variant   |               |
|----------|---------------|-----------------------------|------------------------|--------|--------------|-------------|------------|-------------------|---------------------------------------------------|---------------------|-------------------------|-----------|---------------|
|          |               |                             |                        |        |              |             |            |                   |                                                   |                     |                         | Frequency | Nucleotide(s) |
| AY532664 | 997           | 891                         |                        | C -> T | CGC -> CGT   |             | rmlB       | transition        | putative dTDP-glucose 4,6-dehydratase             | 25.00%              | C                       | 75.00%    | T             |
| AY532664 | 1021          | 915                         |                        | G -> C | GCG -> GCC   |             | rmlB       | transversion      | putative dTDP-glucose 4,6-dehydratase             | 25.00%              | G                       | 75.00%    | C             |
| AY532664 | 1043          | 937                         |                        | C -> T | CGC -> TGC   | R -> C      | rmlB       | transition        | putative dTDP-glucose 4,6-dehydratase             | 95.80%              | C                       | 4.20%     | T             |
| AY532664 | 1090          | 984                         |                        | G -> T | CGG -> CGT   |             | rmlB       | transversion      | putative dTDP-glucose 4,6-dehydratase             | 25.00%              | G                       | 75.00%    | T             |
| AY532664 | 1093          | 987                         |                        | G -> A | AAG -> AAA   |             | rmlB       | transition        | putative dTDP-glucose 4,6-dehydratase             | 25.00%              | G                       | 75.00%    | A             |
| AY532664 | 1132          | 1026                        |                        | A -> G | CGA -> CCG   |             | rmlB       | transition        | putative dTDP-glucose 4,6-dehydratase             | 29.20%              | A                       | 70.80%    | G             |
| AY532664 | 1174          | 1068                        |                        | G -> A | GTG -> GTA   |             | rmlB       | transition        | putative dTDP-glucose 4,6-dehydratase             | 29.20%              | G                       | 70.80%    | A             |
| AY532664 | 1200          |                             |                        | C -> T |              |             | intergenic | transition        |                                                   | 29.20%              | C                       | 70.80%    | T             |
| AY532664 | 1212          |                             |                        | G -> A |              |             | intergenic | transition        |                                                   | 29.20%              | G                       | 70.80%    | A             |
| AY532664 | 1215          |                             |                        | T -> A |              |             | intergenic | transversion      |                                                   | 29.20%              | T                       | 70.80%    | A             |
| AY532664 | 1296          |                             |                        | G -> A |              |             | intergenic | transition        |                                                   | 95.80%              | G                       | 4.20%     | A             |
| AY532664 | 1356          |                             |                        | A -> G |              |             | intergenic | transition        |                                                   | 95.80%              | A                       | 4.20%     | G             |
| AY532664 | 1488          |                             |                        | T -> C |              |             | intergenic | transition        |                                                   | 25.00%              | T                       | 75.00%    | C             |
| AY532664 | 1515          |                             |                        | T -> C |              |             | intergenic | transition        |                                                   | 95.80%              | T                       | 4.20%     | C             |
| AY532664 | 1617          |                             |                        | G -> A |              |             | intergenic | transition        |                                                   | 95.80%              | G                       | 4.20%     | A             |
| AY532664 | 1629          |                             |                        | A -> G |              |             | intergenic | transition        |                                                   | 29.20%              | A                       | 70.80%    | G             |
| AY532664 | 1899          |                             |                        | T -> C |              |             | intergenic | transition        |                                                   | 95.80%              | T                       | 4.20%     | C             |
| AY532664 | 2037          |                             |                        | T -> C |              |             | intergenic | transition        |                                                   | 95.80%              | T                       | 4.20%     | C             |
| AY532664 | 2071          | 27                          |                        | C -> G | CAC -> CAG   | H -> Q      | wbtA       | transversion      | putative dTDP-6-deoxy-3,4-keto-hexulose isomerase | 95.80%              | C                       | 4.20%     | G             |
| AY532664 | 2110          | 66                          |                        | T -> G | GTT -> GTG   |             | wbtA       | transversion      | putative dTDP-6-deoxy-3,4-keto-hexulose isomerase | 95.80%              | T                       | 4.20%     | G             |
| AY532664 | 2375          | 331                         |                        | T -> C | TTG -> CTG   |             | wbtA       | transition        | putative dTDP-6-deoxy-3,4-keto-hexulose isomerase | 29.20%              | T                       | 70.80%    | C             |
| AY532664 | 2432          | 388                         |                        | C -> A | CGG -> AGG   |             | wbtA       | transversion      | putative dTDP-6-deoxy-3,4-keto-hexulose isomerase | 29.20%              | C                       | 70.80%    | A             |
| AY532664 | 2440          | 396                         |                        | G -> A | ATG -> ATA   | M -> I      | wbtA       | transition        | putative dTDP-6-deoxy-3,4-keto-hexulose isomerase | 25.00%              | G                       | 75.00%    | A             |
| AY532664 | 2500          |                             |                        | A -> G |              |             | intergenic | transition        |                                                   | 95.80%              | A                       | 4.20%     | G             |
| AY532664 | 2510          |                             |                        | A -> G |              |             | intergenic | transition        |                                                   | 95.80%              | A                       | 4.20%     | G             |
| AY532664 | 2529          |                             |                        | G -> A |              |             | intergenic | transition        |                                                   | 25.00%              | G                       | 75.00%    | A             |
| AY532664 | 2678          |                             |                        | C -> T |              |             | intergenic | transition        |                                                   | 95.80%              | C                       | 4.20%     | T             |
| AY532664 | 2738          |                             |                        | A -> T |              |             | intergenic | transversion      |                                                   | 95.80%              | A                       | 4.20%     | T             |
| AY532664 | 2858          |                             |                        | A -> G |              |             | intergenic | transition        |                                                   | 95.80%              | A                       | 4.20%     | G             |
| AY532664 | 2957          |                             |                        | A -> G |              |             | intergenic | transition        |                                                   | 95.80%              | A                       | 4.20%     | G             |
| AY532664 | 2977          | 3                           |                        | G -> A | TTG -> TTA   |             | wbtC       | transition        | putative aminotransferase                         | 95.80%              | G                       | 4.20%     | A             |
| AY532664 | 2990          | 16                          |                        | A -> G | ATG -> GTG   | M -> V      | wbtC       | transition        | putative aminotransferase                         | 91.70%              | A                       | 8.30%     | G             |
| AY532664 | 3035          | 61                          |                        | A -> G | ATG -> GTG   | M -> V      | wbtC       | transition        | putative aminotransferase                         | 29.20%              | A                       | 70.80%    | G             |
| AY532664 | 3085          | 111                         |                        | T -> A | ATT -> ATA   |             | wbtC       | transversion      | putative aminotransferase                         | 95.80%              | T                       | 4.20%     | A             |
| AY532664 | 3092          | 118                         |                        | A -> G | ACG -> GCG   | T -> A      | wbtC       | transition        | putative aminotransferase                         | 95.80%              | A                       | 4.20%     | G             |
| AY532664 | 3266          | 292                         |                        | G -> A | GTT -> ATT   | V -> I      | wbtC       | transition        | putative aminotransferase                         | 95.80%              | G                       | 4.20%     | A             |
| AY532664 | 3409          | 435                         |                        | A -> C | ATA -> ATC   |             | wbtC       | transversion      | putative aminotransferase                         | 95.80%              | A                       | 4.20%     | C             |
| AY532664 | 3475          | 501                         |                        | T -> A | GTT -> GCA   |             | wbtC       | transversion      | putative aminotransferase                         | 95.80%              | T                       | 4.20%     | A             |
| AY532664 | 3496          | 522                         |                        | T -> C | ATT -> ATC   |             | wbtC       | transition        | putative aminotransferase                         | 25.00%              | T                       | 75.00%    | C             |
| AY532664 | 3532          | 558                         |                        | T -> A | GCT -> GCA   |             | wbtC       | transversion      | putative aminotransferase                         | 95.80%              | T                       | 4.20%     | A             |
| AY532664 | 3552          | 578                         |                        | G -> T | GGA -> GTA   | G -> V      | wbtC       | transversion      | putative aminotransferase                         | 95.80%              | G                       | 4.20%     | T             |
| AY532664 | 3580          | 606                         |                        | A -> T | GCA -> GCT   |             | wbtC       | transversion      | putative aminotransferase                         | 95.80%              | A                       | 4.20%     | T             |
| AY532664 | 3643          | 669                         |                        | T -> A | GGT -> GGA   |             | wbtC       | transversion      | putative aminotransferase                         | 95.80%              | T                       | 4.20%     | A             |
| AY532664 | 3694          | 720                         |                        | T -> C | GAT -> GAC   |             | wbtC       | transition        | putative aminotransferase                         | 95.80%              | T                       | 4.20%     | C             |
| AY532664 | 3934          | 960                         |                        | A -> G | CCA -> CCG   |             | wbtC       | transition        | putative aminotransferase                         | 95.80%              | A                       | 4.20%     | G             |
| AY532664 | 3971          | 997                         |                        | A -> G | AGT -> GGT   | S -> G      | wbtC       | transition        | putative aminotransferase                         | 95.80%              | A                       | 4.20%     | G             |
| AY532664 | 4269          |                             |                        | A -> G |              |             | intergenic | transition        |                                                   | 95.80%              | A                       | 4.20%     | G             |
| AY532664 | 4313          |                             |                        | A -> G |              |             | intergenic | transition        |                                                   | 95.80%              | A                       | 4.20%     | G             |
| AY532664 | 4464          |                             |                        | C -> T |              |             | intergenic | transition        |                                                   | 95.80%              | C                       | 4.20%     | T             |
| AY532664 | 4557          |                             |                        | C -> T |              |             | intergenic | transition        |                                                   | 25.00%              | C                       | 75.00%    | T             |
| AY532664 | 4734          |                             |                        | C -> T |              |             | intergenic | transition        |                                                   | 29.20%              | C                       | 70.80%    | T             |
| AY532664 | 4820          |                             |                        | C -> T |              |             | intergenic | transition        |                                                   | 95.80%              | C                       | 4.20%     | T             |
| AY532664 | 4840          |                             |                        | G -> T |              |             | intergenic | transversion      |                                                   | 95.80%              | G                       | 4.20%     | T             |
| AY532664 | 4975          |                             |                        | A -> G |              |             | intergenic | transition        |                                                   | 95.80%              | A                       | 4.20%     | G             |
| AY532664 | 5030          |                             |                        | G -> C |              |             | intergenic | transversion      |                                                   | 95.80%              | G                       | 4.20%     | C             |
| AY532664 | 5193          |                             |                        | G -> A |              |             | intergenic | transition        |                                                   | 95.80%              | G                       | 4.20%     | A             |
| AY532664 | 5196          |                             |                        | T -> G |              |             | intergenic | transversion      |                                                   | 29.20%              | T                       | 70.80%    | G             |
| AY532664 | 5420          | 68                          |                        | A -> G | AAT -> AGT   | N -> S      | wbtD       | transition        | putative glycosyltransferase                      | 95.80%              | A                       | 4.20%     | G             |
| AY532664 | 5598          | 246                         |                        | T -> A | AAT -> AAA   | N -> K      | wbtD       | transversion      | putative glycosyltransferase                      | 95.80%              | T                       | 4.20%     | A             |
| AY532664 | 5880          | 528                         |                        | T -> C | TAT -> TAC   |             | wbtD       | transition        | putative glycosyltransferase                      | 95.80%              | T                       | 4.20%     | C             |
| AY532664 | 5884          | 532                         |                        | A -> G | ATT -> GTT   | I -> V      | wbtD       | transition        | putative glycosyltransferase                      | 95.80%              | A                       | 4.20%     | G             |
| AY532664 | 5937          | 585                         |                        | T -> C | GTT -> GTC   |             | wbtD       | transition        | putative glycosyltransferase                      | 95.80%              | T                       | 4.20%     | C             |
| AY532664 | 5974          | 622                         |                        | T -> C | TAT -> CAT   | Y -> H      | wbtD       | transition        | putative glycosyltransferase                      | 95.80%              | T                       | 4.20%     | C             |
| AY532664 | 6147          | 795                         |                        | A -> T | GTA -> GTT   |             | wbtD       | transversion      | putative glycosyltransferase                      | 95.80%              | A                       | 4.20%     | T             |
| AY532664 | 6175          | 823                         |                        | T -> C | TAT -> CAT   | Y -> H      | wbtD       | transition        | putative glycosyltransferase                      | 95.80%              | T                       | 4.20%     | C             |

Supplemental Table 3. Nucleotide polymorphism allele frequencies of O-antigen operon from serogroups.

| Serotype | Sequence Name | Reference sequence position | Gene sequence position | Change   | Codon Change | A.A.   |             | Polymorphism |                                | Reference Frequency | Reference Nucleotide(s) | Variant Frequency | Variant Nucleotide(s) |
|----------|---------------|-----------------------------|------------------------|----------|--------------|--------|-------------|--------------|--------------------------------|---------------------|-------------------------|-------------------|-----------------------|
|          |               |                             |                        |          |              | Change | gene        | Type         | product                        |                     |                         |                   |                       |
|          | AY532664      | 6215                        | 863                    | G -> A   | GGT -> GAT   | G -> D | <i>wbtD</i> | transition   | putative glycosyltransferase   | 95.80%              | G                       | 4.20%             | A                     |
|          | AY532664      | 6253                        | 901                    | AT -> GC | ATA -> GCA   | I -> A | <i>wbtD</i> | Substitution | putative glycosyltransferase   | 95.80%              | AT                      | 4.20%             | GC                    |
|          | AY532664      | 6289                        | 937                    | C -> T   | CAT -> TAT   | H -> Y | <i>wbtD</i> | transition   | putative glycosyltransferase   | 33.30%              | C                       | 66.70%            | T                     |
|          | AY532664      | 6292                        | 940                    | A -> G   | ATT -> GTT   | I -> V | <i>wbtD</i> | transition   | putative glycosyltransferase   | 95.80%              | A                       | 4.20%             | G                     |
|          | AY532664      | 6327                        | 975                    | A -> G   | AAA -> AAG   |        | <i>wbtD</i> | transition   | putative glycosyltransferase   | 95.80%              | A                       | 4.20%             | G                     |
|          | AY532664      | 6347                        | 6                      | A -> G   | AAA -> AAG   |        | <i>wbtE</i> | transition   | putative glycosyltransferase   | 95.80%              | A                       | 4.20%             | G                     |
|          | AY532664      | 6458                        | 117                    | A -> G   | GTA -> GTG   |        | <i>wbtE</i> | transition   | putative glycosyltransferase   | 95.80%              | A                       | 4.20%             | G                     |
|          | AY532664      | 6556                        | 215                    | G -> A   | AGC -> AAC   | S -> N | <i>wbtE</i> | transition   | putative glycosyltransferase   | 95.80%              | G                       | 4.20%             | A                     |
|          | AY532664      | 6606                        | 265                    | A -> G   | ATT -> GTT   | I -> V | <i>wbtE</i> | transition   | putative glycosyltransferase   | 95.80%              | A                       | 4.20%             | G                     |
|          | AY532664      | 6665                        | 324                    | C -> A   | ATC -> ATA   |        | <i>wbtE</i> | transversion | putative glycosyltransferase   | 95.80%              | C                       | 4.20%             | A                     |
|          | AY532664      | 6957                        | 616                    | A -> G   | AAT -> GAT   | N -> D | <i>wbtE</i> | transition   | putative glycosyltransferase   | 95.80%              | A                       | 4.20%             | G                     |
|          | AY532664      | 6968                        | 627                    | G -> A   | ACG -> ACA   |        | <i>wbtE</i> | transition   | putative glycosyltransferase   | 95.80%              | G                       | 4.20%             | A                     |
|          | AY532664      | 7082                        | 741                    | T -> C   | TAT -> TAC   |        | <i>wbtE</i> | transition   | putative glycosyltransferase   | 29.20%              | T                       | 70.80%            | C                     |
|          | AY532664      | 7109                        | 768                    | G -> A   | TTG -> TTA   |        | <i>wbtE</i> | transition   | putative glycosyltransferase   | 95.80%              | G                       | 4.20%             | A                     |
|          | AY532664      | 7160                        | 819                    | A -> T   | CGA -> CGT   |        | <i>wbtE</i> | transversion | putative glycosyltransferase   | 95.80%              | A                       | 4.20%             | T                     |
|          | AY532664      | 7166                        | 825                    | C -> T   | TAC -> TAT   |        | <i>wbtE</i> | transition   | putative glycosyltransferase   | 25.00%              | C                       | 75.00%            | T                     |
|          | AY532664      | 7294                        |                        | T -> C   |              |        | intergenic  | transition   |                                | 95.80%              | T                       | 4.20%             | C                     |
|          | AY532664      | 7300                        |                        | A -> G   |              |        | intergenic  | transition   |                                | 25.00%              | A                       | 75.00%            | G                     |
|          | AY532664      | 7374                        |                        | T -> A   |              |        | intergenic  | transversion |                                | 29.20%              | T                       | 70.80%            | A                     |
|          | AY532664      | 7418                        |                        | T -> G   |              |        | intergenic  | transversion |                                | 91.70%              | T                       | 8.30%             | G                     |
|          | AY532664      | 7428                        |                        | C -> T   |              |        | intergenic  | transition   |                                | 95.80%              | C                       | 4.20%             | T                     |
|          | AY532664      | 7435                        |                        | A -> G   |              |        | intergenic  | transition   |                                | 25.00%              | A                       | 75.00%            | G                     |
|          | AY532664      | 7481                        |                        | G -> A   |              |        | intergenic  | transition   |                                | 95.80%              | G                       | 4.20%             | A                     |
|          | AY532664      | 7492                        |                        | C -> T   |              |        | intergenic  | transition   |                                | 95.80%              | C                       | 4.20%             | T                     |
|          | AY532664      | 7578                        |                        | T -> G   |              |        | intergenic  | transversion |                                | 95.80%              | T                       | 4.20%             | G                     |
|          | AY532664      | 7591                        |                        | A -> T   |              |        | intergenic  | transversion |                                | 95.80%              | A                       | 4.20%             | T                     |
|          | AY532664      | 7701                        |                        | T -> C   |              |        | intergenic  | transition   |                                | 29.20%              | T                       | 70.80%            | C                     |
|          | AY532664      | 7719                        |                        | C -> T   |              |        | intergenic  | transition   |                                | 95.80%              | C                       | 4.20%             | T                     |
|          | AY532664      | 7795                        |                        | T -> C   |              |        | intergenic  | transition   |                                | 95.80%              | T                       | 4.20%             | C                     |
|          | AY532664      | 7882                        |                        | G -> A   |              |        | intergenic  | transition   |                                | 95.80%              | G                       | 4.20%             | A                     |
|          | AY532664      | 7922                        |                        | T -> A   |              |        | intergenic  | transversion |                                | 25.00%              | T                       | 75.00%            | A                     |
|          | AY532664      | 7944                        |                        | G -> T   |              |        | intergenic  | transversion |                                | 95.80%              | G                       | 4.20%             | T                     |
|          | AY532664      | 8065                        |                        | T -> C   |              |        | intergenic  | transition   |                                | 95.80%              | T                       | 4.20%             | C                     |
|          | AY532664      | 8078                        |                        | T -> A   |              |        | intergenic  | transversion |                                | 29.20%              | T                       | 70.80%            | A                     |
|          | AY532664      | 8116                        |                        | C -> T   |              |        | intergenic  | transition   |                                | 29.20%              | C                       | 70.80%            | T                     |
|          | AY532664      | 8224                        |                        | A -> G   |              |        | intergenic  | transition   |                                | 95.80%              | A                       | 4.20%             | G                     |
|          | AY532664      | 8256                        |                        | A -> G   |              |        | intergenic  | transition   |                                | 79.20%              | A                       | 20.80%            | G                     |
|          | AY532664      | 8312                        |                        | A -> G   |              |        | intergenic  | transition   |                                | 95.80%              | A                       | 4.20%             | G                     |
|          | AY532664      | 8358                        |                        | G -> T   |              |        | intergenic  | transversion |                                | 95.80%              | G                       | 4.20%             | T                     |
|          | AY532664      | 8370                        |                        | G -> A   |              |        | intergenic  | transition   |                                | 29.20%              | G                       | 70.80%            | A                     |
|          | AY532664      | 8607                        | 225                    | G -> A   | GTG -> GTA   |        | <i>wbtF</i> | transition   | putative glycosyltransferase   | 95.80%              | G                       | 4.20%             | A                     |
|          | AY532664      | 8621                        | 239                    | A -> C   | TAT -> TCT   | Y -> S | <i>wbtF</i> | transversion | putative glycosyltransferase   | 95.80%              | A                       | 4.20%             | C                     |
|          | AY532664      | 8792                        | 410                    | CT -> TG | GCT -> GTG   | A -> V | <i>wbtF</i> | Substitution | putative glycosyltransferase   |                     | CT                      | 4.20%             | TG                    |
|          | AY532664      | 8871                        | 489                    | T -> C   | GTT -> GTC   |        | <i>wbtF</i> | transition   | putative glycosyltransferase   | 95.80%              | T                       | 4.20%             | C                     |
|          | AY532664      | 8892                        | 510                    | T -> A   | GAT -> GAA   | D -> E | <i>wbtF</i> | transversion | putative glycosyltransferase   | 95.80%              | T                       | 4.20%             | A                     |
|          | AY532664      | 8937                        | 555                    | T -> C   | AGT -> AGC   |        | <i>wbtF</i> | transition   | putative glycosyltransferase   | 95.80%              | T                       | 4.20%             | C                     |
|          | AY532664      | 9222                        | 840                    | A -> T   | GTA -> GTT   |        | <i>wbtF</i> | transversion | putative glycosyltransferase   | 95.80%              | A                       | 4.20%             | T                     |
|          | AY532664      | 9368                        | 986                    | A -> T   | CAC -> CTC   | H -> L | <i>wbtF</i> | transversion | putative glycosyltransferase   | 95.80%              | A                       | 4.20%             | T                     |
|          | AY532664      | 9494                        |                        | Deletion |              |        | intergenic  | Deletion     |                                |                     | A                       | 4.20%             |                       |
|          | AY532664      | 9528                        |                        | G -> A   |              |        | intergenic  | transition   |                                | 25.00%              | G                       | 75.00%            | A                     |
|          | AY532664      | 9540                        |                        | T -> G   |              |        | intergenic  | transversion |                                | 95.80%              | T                       | 4.20%             | G                     |
|          | AY532664      | 9545                        |                        | T -> C   |              |        | intergenic  | transition   |                                | 29.20%              | T                       | 70.80%            | C                     |
|          | AY532664      | 9580                        |                        | G -> A   |              |        | intergenic  | transition   |                                | 95.80%              | G                       | 4.20%             | A                     |
|          | AY532664      | 9613                        |                        | T -> C   |              |        | intergenic  | transition   |                                | 8.30%               | T                       | 91.70%            | C                     |
|          | AY532664      | 9634                        |                        | A -> G   |              |        | intergenic  | transition   |                                | 95.80%              | A                       | 4.20%             | G                     |
|          | AY532664      | 9645                        |                        | G -> A   |              |        | intergenic  | transition   |                                | 95.80%              | A                       | 4.20%             | G                     |
|          | AY532664      | 9882                        | 223                    | T -> C   | TTG -> CTG   |        | <i>wbtG</i> | transition   | putative galactosyltransferase | 25.00%              | T                       | 75.00%            | C                     |
|          | AY532664      | 9944                        | 285                    | C -> T   | GTC -> GTT   |        | <i>wbtG</i> | transition   | putative galactosyltransferase | 29.20%              | C                       | 70.80%            | T                     |
|          | AY532664      | 9951                        | 292                    | G -> A   | GGT -> AGT   | G -> S | <i>wbtG</i> | transition   | putative galactosyltransferase | 95.80%              | G                       | 4.20%             | A                     |
|          | AY532664      | 10094                       | 435                    | G -> A   | ATG -> ATA   | M -> I | <i>wbtG</i> | transition   | putative galactosyltransferase | 95.80%              | G                       | 4.20%             | A                     |
|          | AY532664      | 10127                       | 468                    | C -> T   | CTC -> CTT   |        | <i>wbtG</i> | transition   | putative galactosyltransferase | 95.80%              | C                       | 4.20%             | T                     |
|          | AY532664      | 10180                       | 521                    | A -> G   | GAT -> GGT   | D -> G | <i>wbtG</i> | transition   | putative galactosyltransferase | 95.80%              | A                       | 4.20%             | G                     |
|          | AY532664      | 10292                       | 633                    | C -> A   | GGC -> GGA   |        | <i>wbtG</i> | transversion | putative galactosyltransferase | 95.80%              | C                       | 4.20%             | A                     |
|          | AY532664      | 10355                       | 696                    | T -> C   | AGT -> AGC   |        | <i>wbtG</i> | transition   | putative galactosyltransferase | 95.80%              | T                       | 4.20%             | C                     |
|          | AY532664      | 10638                       | 979                    | C -> A   | CAA -> AAA   | Q -> K | <i>wbtG</i> | transversion | putative galactosyltransferase | 95.80%              | C                       | 4.20%             | A                     |

Supplemental Table 3. Nucleotide polymorphism allele frequencies of O-antigen operon from serogroups.

| Serotype | Sequence Name | Reference sequence position | Gene sequence position | Change     | Codon Change | A.A. Change | Polymorphism |                                         |                                    | Reference Frequency | Reference Nucleotide(s) | Variant Frequency | Variant Nucleotide(s) |
|----------|---------------|-----------------------------|------------------------|------------|--------------|-------------|--------------|-----------------------------------------|------------------------------------|---------------------|-------------------------|-------------------|-----------------------|
|          |               |                             |                        |            |              |             | gene         | Type                                    | product                            |                     |                         |                   |                       |
| O111     | AY532664      | 10715                       | 1056                   | G -> A     | AGG -> AGA   |             | <i>wbtG</i>  | transition                              | putative galactosyltransferase     | 25.00%              | G                       | 75.00%            | A                     |
|          | AY532664      | 10818                       |                        | C -> T     |              |             | intergenic   | transition                              |                                    | 25.00%              | C                       | 75.00%            | T                     |
|          | AY532664      | 10935                       | 76                     | G -> A     | GAA -> AAA   | E -> K      | <i>galE</i>  | transition                              | putative UDP-galactose-4-epimerase | 95.80%              | G                       | 4.20%             | A                     |
|          | AY532664      | 10952                       | 93                     | T -> C     | GAT -> GAC   |             | <i>galE</i>  | transition                              | putative UDP-galactose-4-epimerase | 95.80%              | T                       | 4.20%             | C                     |
|          | AY532664      | 11099                       | 240                    | T -> C     | TTT -> TTC   |             | <i>galE</i>  | transition                              | putative UDP-galactose-4-epimerase | 95.80%              | T                       | 4.20%             | C                     |
|          | AY532664      | 11106                       | 247                    | C -> T     | CTG -> TTG   |             | <i>galE</i>  | transition                              | putative UDP-galactose-4-epimerase | 95.80%              | C                       | 4.20%             | T                     |
|          | AY532664      | 11255                       | 396                    | G -> A     | GAG -> GAA   |             | <i>galE</i>  | transition                              | putative UDP-galactose-4-epimerase | 95.80%              | G                       | 4.20%             | A                     |
|          | AY532664      | 11333                       | 474                    | A -> C     | AAA -> AAC   | K -> N      | <i>galE</i>  | transversion                            | putative UDP-galactose-4-epimerase | 25.00%              | A                       | 75.00%            | C                     |
|          | AY532664      | 11366                       | 507                    | T -> C     | TTT -> TTC   |             | <i>galE</i>  | transition                              | putative UDP-galactose-4-epimerase | 95.80%              | T                       | 4.20%             | C                     |
|          | AY532664      | 11405                       | 546                    | C -> T     | GGC -> GGT   |             | <i>galE</i>  | transition                              | putative UDP-galactose-4-epimerase | 95.80%              | C                       | 4.20%             | T                     |
|          | AY532664      | 11636                       | 777                    | C -> T     | TAC -> TAT   |             | <i>galE</i>  | transition                              | putative UDP-galactose-4-epimerase | 95.80%              | C                       | 4.20%             | T                     |
|          | AY532664      | 11762                       | 903                    | C -> T     | TCC -> TCT   |             | <i>galE</i>  | transition                              | putative UDP-galactose-4-epimerase | 95.80%              | C                       | 4.20%             | T                     |
|          | AY532664      | 11899                       |                        | C -> G     |              |             | intergenic   | transversion                            |                                    | 25.00%              | C                       | 75.00%            | G                     |
|          | AF078736      | 425                         |                        | G -> A     |              |             | intergenic   | transition                              |                                    | 97.90%              | G                       | 2.10%             | A                     |
|          | AF078736      | 478                         |                        | T -> G     |              |             | intergenic   | transversion                            |                                    | 93.80%              | T                       | 6.30%             | G                     |
|          | AF078736      | 492                         |                        | G -> T     |              |             | intergenic   | transversion                            |                                    | 43.80%              | G                       | 56.30%            | T                     |
|          | AF078736      | 948                         | 210                    | Deletion   | GTT -> GTA   |             | <i>wbdH</i>  | Deletion                                | putative glycosyl transferase      |                     | T                       | 2.10%             |                       |
|          | AF078736      | 1022                        | 284                    | A -> C     | AAA -> ACA   | K -> T      | <i>wbdH</i>  | transversion                            | putative glycosyl transferase      | 37.50%              | A                       | 62.50%            | C                     |
|          | AF078736      | 1453                        | 715                    | T -> C     | TTC -> CTC   | F -> L      | <i>wbdH</i>  | transition                              | putative glycosyl transferase      | 97.90%              | T                       | 2.10%             | C                     |
|          | AF078736      | 1744                        | 1006                   | G -> A     | GTC -> ATC   | V -> I      | <i>wbdH</i>  | transition                              | putative glycosyl transferase      | 43.80%              | G                       | 56.30%            | A                     |
|          | AF078736      | 1957                        |                        | C -> A     |              |             |              | transversion                            | intergenic                         | 97.90%              | C                       | 2.10%             | A                     |
|          | AF078736      | 1963                        |                        | G -> A     |              |             |              | transition                              | intergenic                         | 95.80%              | G                       | 4.20%             | A                     |
|          | AF078736      | 1994                        | 12                     | G -> A     |              |             | <i>gmd</i>   | transition                              | GDP-D-mannose dehydratase          | 91.70%              | G                       | 8.30%             | A                     |
|          | AF078736      | 2594                        | 612                    | G -> A     | GTG -> GTA   |             | <i>gmd</i>   | transition                              | GDP-D-mannose dehydratase          | 97.90%              | G                       | 2.10%             | A                     |
|          | AF078736      | 2621                        | 639                    | T -> G     | GAT -> GAG   | D -> E      | <i>gmd</i>   | transversion                            | GDP-D-mannose dehydratase          | 27.10%              | T                       | 72.90%            | G                     |
|          | AF078736      | 3121                        |                        | A -> G     |              |             | intergenic   | transition                              |                                    | 97.90%              | A                       | 2.10%             | G                     |
|          | AF078736      | 3133                        |                        | T -> C     |              |             | intergenic   | transition                              |                                    | 97.90%              | T                       | 2.10%             | C                     |
|          | AF078736      | 3149                        |                        | A -> G     |              |             | intergenic   | transition                              |                                    | 93.80%              | A                       | 6.30%             | G                     |
|          | AF078736      | 3155                        |                        | Deletion   |              |             | intergenic   | Deletion                                |                                    |                     | A                       | 4.20%             |                       |
|          | AF078736      | 3157                        |                        | T -> A     |              |             | intergenic   | transversion                            |                                    | 97.90%              | T                       | 2.10%             | A                     |
|          | AF078736      | 3163                        |                        | Deletion   |              |             | intergenic   | Deletion                                |                                    |                     | TT                      | 95.8% -> 100.0%   |                       |
|          | AF078736      | 3167                        |                        | G -> T     |              |             | intergenic   | transversion                            |                                    | 95.80%              | G                       | 4.20%             | T                     |
|          | AF078736      | 3170                        |                        | A -> G     |              |             | intergenic   | transition                              |                                    | 97.90%              | A                       | 2.10%             | G                     |
| AF078736 | 3728          | 72                          | A -> C                 | GTA -> GTC |              | <i>manC</i> | transversion | mannose-1-phosphate guanylyltransferase | 37.50%                             | A                   | 62.50%                  | C                 |                       |
| AF078736 | 4682          | 1026                        | T -> A                 | GAT -> GAA | D -> E       | <i>manC</i> | transversion | mannose-1-phosphate guanylyltransferase | 83.30%                             | T                   | 16.70%                  | A                 |                       |
| AF078736 | 5688          | 575                         | G -> A                 | TGC -> TAC | C -> Y       | <i>manB</i> | transition   | phosphomannomutase                      | 93.80%                             | G                   | 6.30%                   | A                 |                       |
| AF078736 | 5805          | 692                         | G -> A                 | AGT -> AAT | S -> N       | <i>manB</i> | transition   | phosphomannomutase                      | 97.90%                             | G                   | 2.10%                   | A                 |                       |
| AF078736 | 6273          | 1160                        | A -> G                 | CAA -> CGA | Q -> R       | <i>manB</i> | transition   | phosphomannomutase                      | 97.90%                             | A                   | 2.10%                   | G                 |                       |
| AF078736 | 6453          | 1340                        | C -> A                 | ACA -> AAA | T -> K       | <i>manB</i> | transversion | phosphomannomutase                      | 95.80%                             | C                   | 4.20%                   | A                 |                       |
| AF078736 | 7045          | 525                         | A -> G                 | TCA -> TCG |              | <i>wbdJ</i> | transition   | WbdJ                                    | 97.90%                             | A                   | 2.10%                   | G                 |                       |
| AF078736 | 7216          | 696                         | A -> G                 | GTA -> GTG |              | <i>wbdJ</i> | transition   | WbdJ                                    | 97.90%                             | A                   | 2.10%                   | G                 |                       |
| AF078736 | 7882          | 442                         | A -> G                 | ATA -> GTA | I -> V       | <i>wbdK</i> | transition   | WbdK                                    | 31.30%                             | A                   | 68.80%                  | G                 |                       |
| AF078736 | 8041          | 601                         | G -> A                 | GAT -> AAT | D -> N       | <i>wbdK</i> | transition   | WbdK                                    | 97.90%                             | G                   | 2.10%                   | A                 |                       |
| AF078736 | 8127          | 687                         | C -> T                 | GGC -> GGT |              | <i>wbdK</i> | transition   | WbdK                                    | 43.80%                             | C                   | 56.30%                  | T                 |                       |
| AF078736 | 8366          | 926                         | A -> C                 | AAG -> ACG | K -> T       | <i>wbdK</i> | transversion | WbdK                                    | 97.90%                             | A                   | 2.10%                   | C                 |                       |
| AF078736 | 8892          | 247                         | T -> G                 | TTA -> GTA | L -> V       | <i>wzx</i>  | transversion | putative O unit flippase                | 97.90%                             | T                   | 2.10%                   | G                 |                       |
| AF078736 | 8906          | 261                         | T -> C                 | AAT -> AAC |              | <i>wzx</i>  | transition   | putative O unit flippase                | 97.90%                             | T                   | 2.10%                   | C                 |                       |
| AF078736 | 8973          | 328                         | C -> T                 | CIT -> TTT | L -> F       | <i>wzx</i>  | transition   | putative O unit flippase                | 31.30%                             | C                   | 68.80%                  | T                 |                       |
| AF078736 | 8985          | 340                         | A -> G                 | ATT -> GTT | I -> V       | <i>wzx</i>  | transition   | putative O unit flippase                | 97.90%                             | A                   | 2.10%                   | G                 |                       |
| AF078736 | 9009          | 364                         | A -> G                 | AAT -> GAT | N -> D       | <i>wzx</i>  | transition   | putative O unit flippase                | 97.90%                             | A                   | 2.10%                   | G                 |                       |
| AF078736 | 9078          | 433                         | G -> A                 | GGT -> AGT | G -> S       | <i>wzx</i>  | transition   | putative O unit flippase                | 37.50%                             | G                   | 62.50%                  | A                 |                       |
| AF078736 | 9660          | 1015                        | A -> G                 | ATT -> GTT | I -> V       | <i>wzx</i>  | transition   | putative O unit flippase                | 95.80%                             | A                   | 4.20%                   | G                 |                       |
| AF078736 | 9666          | 1021                        | G -> A                 | GCT -> ACT | A -> T       | <i>wzx</i>  | transition   | putative O unit flippase                | 95.80%                             | G                   | 4.20%                   | A                 |                       |
| AF078736 | 9773          | 1128                        | A -> T                 | GCA -> GCT |              | <i>wzx</i>  | transversion | putative O unit flippase                | 43.80%                             | A                   | 56.30%                  | T                 |                       |
| AF078736 | 10212         |                             | G -> A                 |            |              | intergenic  | transition   |                                         | 2.10%                              | G                   | 97.90%                  | A                 |                       |
| AF078736 | 10440         |                             | A -> G                 |            |              | intergenic  | transition   |                                         | 93.80%                             | A                   | 6.30%                   | G                 |                       |
| AF078736 | 10851         |                             | A -> G                 |            |              | intergenic  | transition   |                                         | 95.80%                             | A                   | 4.20%                   | G                 |                       |
| AF078736 | 11870         | 50                          | A -> T                 | CAC -> CTC | H -> L       | <i>wbdM</i> | transversion | putative glycosyl transferase           | 31.30%                             | A                   | 68.80%                  | T                 |                       |
| AF078736 | 12153         | 333                         | C -> T                 | CAC -> CAT |              | <i>wbdM</i> | transition   | putative glycosyl transferase           | 97.90%                             | C                   | 2.10%                   | T                 |                       |
| AF078736 | 12155         | 335                         | A -> G                 | AAC -> AGC | N -> S       | <i>wbdM</i> | transition   | putative glycosyl transferase           | 33.30%                             | A                   | 66.70%                  | G                 |                       |
| AF078736 | 12201         | 381                         | T -> C                 | AGT -> AGC |              | <i>wbdM</i> | transition   | putative glycosyl transferase           | 97.90%                             | T                   | 2.10%                   | C                 |                       |
| AF078736 | 12295         | 475                         | A -> G                 | ATT -> GTT | I -> V       | <i>wbdM</i> | transition   | putative glycosyl transferase           | 97.90%                             | A                   | 2.10%                   | G                 |                       |
| AF078736 | 12381         | 561                         | T -> C                 | AGT -> AGC |              | <i>wbdM</i> | transition   | putative glycosyl transferase           | 83.30%                             | T                   | 16.70%                  | C                 |                       |

Supplemental Table 3. Nucleotide polymorphism allele frequencies of O-antigen operon from serogroups.

| Serotype | Sequence Name | Reference sequence position | Gene sequence position | Change     | Codon Change | A.A.   |             | Polymorphism |                               | Reference Frequency                                       | Reference Nucleotide(s) | Variant Frequency | Variant Nucleotide(s) |   |
|----------|---------------|-----------------------------|------------------------|------------|--------------|--------|-------------|--------------|-------------------------------|-----------------------------------------------------------|-------------------------|-------------------|-----------------------|---|
|          |               |                             |                        |            |              | Change | gene        | Type         | product                       |                                                           |                         |                   |                       |   |
| O121     | AF078736      | 12564                       | 744                    | G -> T     | GTG -> GTT   |        |             | <i>wbdM</i>  | transversion                  | putative glycosyl transferase                             | 97.90%                  | G                 | 2.10%                 | T |
|          | AF078736      | 12585                       | 765                    | G -> A     | GGG -> GGA   |        |             | <i>wbdM</i>  | transition                    | putative glycosyl transferase                             | 97.90%                  | G                 | 2.10%                 | A |
|          | AF078736      | 13093                       |                        | G -> A     |              |        |             | intergenic   | transition                    |                                                           | 97.90%                  | G                 | 2.10%                 | A |
|          | AF078736      | 13883                       | 760                    | C -> T     | CTG -> TTG   |        |             | <i>gnd</i>   | transition                    | 6-phosphogluconate dehydrogenase                          | 97.90%                  | C                 | 2.10%                 | T |
|          | AY208937      | 1609                        | 161                    | T -> A     | TTT -> TAT   | F -> Y |             | <i>wbqB</i>  | transversion                  | putative UDP-glucose-4-epimerase                          | 92.30%                  | T                 | 7.70%                 | A |
|          | AY208937      | 1730                        | 282                    | T -> C     | GTT -> GTC   |        |             | <i>wbqB</i>  | transition                    | putative UDP-glucose-4-epimerase                          | 76.90%                  | T                 | 23.10%                | C |
|          | AY208937      | 2015                        | 567                    | C -> T     | TAC -> TAT   |        |             | <i>wbqB</i>  | transition                    | putative UDP-glucose-4-epimerase                          | 92.30%                  | C                 | 7.70%                 | T |
|          | AY208937      | 3412                        | 912                    | C -> G     | CGC -> CGG   |        |             | <i>rmlB</i>  | transversion                  | putative dTDP-glucose-4,6-dehydratase                     | 92.30%                  | C                 | 7.70%                 | G |
|          | AY208937      | 3868                        |                        | A -> G     |              |        |             |              | transition                    |                                                           | 92.30%                  | A                 | 7.70%                 | G |
|          | AY208937      | 4658                        | 204                    | A -> G     | GTA -> GTG   |        |             | <i>vioA</i>  | transition                    | putative dTDP-4-amino-4,6-dideoxyglucose aminotransferase | 76.90%                  | A                 | 23.10%                | G |
|          | AY208937      | 4671                        | 217                    | G -> A     | GTT -> ATT   | V -> I |             | <i>vioA</i>  | transition                    | putative dTDP-4-amino-4,6-dideoxyglucose aminotransferase | 76.90%                  | G                 | 23.10%                | A |
|          | AY208937      | 4767                        | 313                    | T -> C     | TCC -> CCC   | S -> P |             | <i>vioA</i>  | transition                    | putative dTDP-4-amino-4,6-dideoxyglucose aminotransferase | 61.50%                  | T                 | 38.50%                | C |
|          | AY208937      | 5255                        | 801                    | A -> T     | ATA -> ATT   |        |             | <i>vioA</i>  | transversion                  | putative dTDP-4-amino-4,6-dideoxyglucose aminotransferase | 92.30%                  | A                 | 7.70%                 | T |
|          | AY208937      | 5303                        | 849                    | C -> T     | TTC -> TTT   |        |             | <i>vioA</i>  | transition                    | putative dTDP-4-amino-4,6-dideoxyglucose aminotransferase | 92.30%                  | C                 | 7.70%                 | T |
|          | AY208937      | 5964                        |                        | K -> T     |              |        |             |              | SNP                           |                                                           |                         | K                 | 100.00%               | T |
|          | AY208937      | 6104                        |                        | G -> A     |              |        |             |              | transition                    |                                                           | 76.90%                  | G                 | 23.10%                | A |
|          | AY208937      | 6247                        |                        | A -> G     |              |        |             |              | transition                    |                                                           | 92.30%                  | A                 | 7.70%                 | G |
|          | AY208937      | 6350                        | 90                     | A -> G     | ATA -> ATG   | I -> M |             | <i>wbqD</i>  | transition                    | putative acetyltransferase                                | 92.30%                  | A                 | 7.70%                 | G |
|          | AY208937      | 6689                        |                        | C -> T     |              |        |             |              | transition                    |                                                           | 92.30%                  | C                 | 7.70%                 | T |
|          | AY208937      | 7212                        | 420                    | T -> C     | TTT -> TTC   |        |             | <i>wzx</i>   | transition                    | O antigen flippase                                        | 92.30%                  | T                 | 7.70%                 | C |
|          | AY208937      | 8603                        | 411                    | G -> A     | GGG -> GGA   |        |             | <i>wbqE</i>  | transition                    | putative glycosyl transferase                             | 76.90%                  | G                 | 23.10%                | A |
|          | AY208937      | 8615                        | 423                    | T -> C     | AGT -> AGC   |        |             | <i>wbqE</i>  | transition                    | putative glycosyl transferase                             | 92.30%                  | T                 | 7.70%                 | C |
|          | AY208937      | 8623                        | 431                    | A -> G     | AAT -> AGT   | N -> S |             | <i>wbqE</i>  | transition                    | putative glycosyl transferase                             | 92.30%                  | A                 | 7.70%                 | G |
|          | AY208937      | 8629                        | 437                    | T -> C     | GTC -> GCC   | V -> A |             | <i>wbqE</i>  | transition                    | putative glycosyl transferase                             | 61.50%                  | T                 | 38.50%                | C |
|          | AY208937      | 8792                        | 600                    | T -> C     | TAT -> TAC   |        |             | <i>wbqE</i>  | transition                    | putative glycosyl transferase                             | 92.30%                  | T                 | 7.70%                 | C |
|          | AY208937      | 8939                        | 747                    | G -> A     | TTG -> TTA   |        |             | <i>wbqE</i>  | transition                    | putative glycosyl transferase                             | 92.30%                  | G                 | 7.70%                 | A |
|          | AY208937      | 9167                        | 82                     | A -> G     | AGC -> GGC   | S -> G |             | <i>wbqF</i>  | transition                    | putative acetyltransferase                                | 92.30%                  | A                 | 7.70%                 | G |
|          | AY208937      | 9172                        | 87                     | T -> C     | CAT -> CAC   |        |             | <i>wbqF</i>  | transition                    | putative acetyltransferase                                | 92.30%                  | T                 | 7.70%                 | C |
|          | AY208937      | 9821                        | 183                    | C -> T     | TAC -> TAT   |        |             | <i>wzy</i>   | transition                    | O antigen polymerase                                      | 92.30%                  | C                 | 7.70%                 | T |
|          | AY208937      | 9980                        | 342                    | G -> A     | TCG -> TCA   |        |             | <i>wzy</i>   | transition                    | O antigen polymerase                                      | 92.30%                  | G                 | 100.00%               | A |
|          | AY208937      | 10404                       | 766                    | T -> A     | TTA -> ATA   | L -> I |             | <i>wzy</i>   | transversion                  | O antigen polymerase                                      | 92.30%                  | T                 | 7.70%                 | A |
|          | AY208937      | 10457                       | 819                    | T -> G     | ATT -> ATG   | I -> M |             | <i>wzy</i>   | transversion                  | O antigen polymerase                                      | 76.90%                  | T                 | 23.10%                | G |
|          | AY208937      | 10467                       | 829                    | C -> T     | CTT -> TTT   | L -> F |             | <i>wzy</i>   | transition                    | O antigen polymerase                                      | 76.90%                  | C                 | 23.10%                | T |
|          | AY208937      | 11901                       | 1065                   | C -> T     | TTT -> TTT   |        |             | <i>wbqG</i>  | transition                    | putative asparagine synthase                              | 92.30%                  | C                 | 7.70%                 | T |
|          | AY208937      | 12045                       | 1209                   | G -> A     | GCG -> GCA   |        |             | <i>wbqG</i>  | transition                    | putative asparagine synthase                              | 92.30%                  | G                 | 7.70%                 | A |
|          | AY208937      | 12246                       | 1410                   | T -> C     | TCT -> TCC   |        |             | <i>wbqG</i>  | transition                    | putative asparagine synthase                              | 92.30%                  | T                 | 7.70%                 | C |
|          | AY208937      | 12526                       | 1690                   | G -> A     | GTA -> ATA   | V -> I |             | <i>wbqG</i>  | transition                    | putative asparagine synthase                              | 76.90%                  | G                 | 23.10%                | A |
|          | AY208937      | 12546                       | 1710                   | A -> G     | TTA -> TTG   |        |             | <i>wbqG</i>  | transition                    | putative asparagine synthase                              | 76.90%                  | A                 | 23.10%                | G |
|          | AY208937      | 12860                       |                        | T -> C     |              |        |             |              | transition                    |                                                           | 76.90%                  | T                 | 23.10%                | C |
|          | AY208937      | 12872                       |                        | A -> G     |              |        |             |              | transition                    |                                                           | 92.30%                  | A                 | 7.70%                 | G |
| AY208937 | 13199         |                             | T -> G                 |            |              |        |             | transversion |                               | 92.30%                                                    | T                       | 7.70%             | G                     |   |
| AY208937 | 13880         | 39                          | T -> C                 | TTT -> TTC |              |        | <i>wbqI</i> | transition   | putative glycosyl transferase | 92.30%                                                    | T                       | 7.70%             | C                     |   |
| AY208937 | 14050         | 209                         | C -> T                 | ACT -> ATT | T -> I       |        | <i>wbqI</i> | transition   | putative glycosyl transferase | 92.30%                                                    | T                       | 7.70%             | C                     |   |
| AY208937 | 14423         | 582                         | A -> G                 | AAA -> AAG |              |        | <i>wbqI</i> | transition   | putative glycosyl transferase | 61.50%                                                    | A                       | 38.50%            | G                     |   |
| AY208937 | 14605         | 764                         | T -> C                 | GTT -> GCT | V -> A       |        | <i>wbqI</i> | transition   | putative glycosyl transferase | 92.30%                                                    | T                       | 7.70%             | C                     |   |
| AY208937 | 14615         | 774                         | C -> T                 | TGC -> TGT |              |        | <i>wbqI</i> | transition   | putative glycosyl transferase | 92.30%                                                    | C                       | 7.70%             | T                     |   |
| AY208937 | 14930         | 1089                        | G -> A                 | CAG -> CAA |              |        | <i>wbqI</i> | transition   | putative glycosyl transferase | 92.30%                                                    | G                       | 7.70%             | A                     |   |
| O145     | AY863412      | 2026                        | 230                    | C -> T     | TCG -> TTG   | S -> L |             | <i>nnaC</i>  | transition                    | CMP-NeuNAc synthetase                                     | 85.70%                  | C                 | 14.30%                | T |
|          | AY863412      | 2481                        | 684                    | Deletion   |              |        |             | <i>nnaC</i>  | insertion                     | CMP-NeuNAc synthetase                                     |                         |                   | 28.60%                | A |
|          | AY863412      | 2483                        | 687                    | Deletion   |              |        |             | <i>nnaC</i>  | deletion                      | CMP-NeuNAc synthetase                                     |                         | T                 | 14.30%                |   |
|          | AY863412      | 5308                        | 939                    | A -> T     | ATA -> ATT   |        |             | <i>wzx</i>   | transversion                  | O antigen flippase                                        | 85.70%                  | A                 | 14.30%                | T |
|          | AY863412      | 5652                        | 37                     | C -> A     | CTT -> ATT   | L -> I |             | <i>wzy</i>   | transversion                  | O antigen polymerase                                      | 71.40%                  | C                 | 28.60%                | A |
|          | AY863412      | 9277                        | 150                    | T -> C     | GCT -> GCC   |        |             | <i>wbeD</i>  | transition                    | glutamine amidotransferase                                | 85.70%                  | T                 | 14.30%                | C |
|          | AY863412      | 9318                        | 191                    | T -> C     | CTG -> CCG   | L -> P |             | <i>wbeD</i>  | transition                    | glutamine amidotransferase                                | 85.70%                  | T                 | 14.30%                | C |
|          | AY863412      | 14364                       |                        | A -> G     |              |        |             | intergenic   | transition                    |                                                           | 85.70%                  | A                 | 14.30%                | G |
